# Supplementary material for: Chemodivergent mechanosynthesis of cyclopentenyl and pyrrolinyl spirobarbiturates from unsaturated barbiturates and enamino esters
Source: Royal Society of Chemistry journal article supplement (doi:10.1039/d3cc06327e), 2024-01-01
Supplement: d3cc06327e1.pdf [file d3cc06327e1.pdf]

## Electronic Supporting Information

### Chemodivergent mechanosynthesis of cyclopentenyl and pyrrolinyl spirobarbiturates from unsaturated barbiturates and enamino esters

Ming-Jun Li,<sup>#</sup> Ming-Ming Lu,<sup>#</sup> Peng Xu, Si-Qi Chen, Luan-Ting Wu, Ze Zhang\* and  
Hui Xu\*

*School of Chemical and Environmental Engineering, Anhui Polytechnic University,  
Wuhu 241000, P. R. China; E-mail: zhangze@ustc.edu.cn, hxu@ahpu.edu.cn*

*<sup>#</sup>The authors contributed equally to this work*

#### Table of contents

|                                                                                 |     |
|---------------------------------------------------------------------------------|-----|
| 1. General information                                                          | S2  |
| 2. Synthetic procedures for the synthesis of <b>3</b> , <b>4</b> and <b>6aa</b> | S2  |
| 3. Characterization data for <b>3</b> , <b>4</b> and <b>6aa</b>                 | S5  |
| 4. Single-crystal X-ray crystallography of <b>3ma</b> and <b>4oa</b>            | S30 |
| 5. References                                                                   | S34 |
| 6. Copies of NMR spectra for <b>3</b> , <b>4</b> and <b>6aa</b>                 | S35 |

## 1. General information

All reagents were obtained from commercial sources and used without further purification. NMR spectra were recorded on a 500 MHz NMR spectrometer (500 MHz for  $^1\text{H}$  NMR and 125 MHz for  $^{13}\text{C}$  NMR).  $^1\text{H}$  NMR chemical shifts were determined relative to internal TMS at  $\delta$  0.0 ppm.  $^{13}\text{C}$  NMR chemical shifts were determined relative to  $\text{CDCl}_3$  at  $\delta$  77.16 ppm. Data for  $^1\text{H}$  NMR and  $^{13}\text{C}$  NMR are reported as follows: chemical shift ( $\delta$ , ppm) and multiplicity (s = singlet, d = doublet, t = triplet, q = quartet, m = multiplet and bs = broad singlet). All melting points were determined on a XT-4 binocular microscope melting point apparatus. High-resolution mass spectra (HRMS) were measured with ESI-TOF in the positive mode. Unsaturated barbiturates **1**<sup>1</sup> and enamino esters **2**<sup>2</sup> were prepared according to the reported protocols.

## 2. Synthetic procedures for the synthesis of 3, 4 and 6aa

### 2.1 General procedure for the synthesis of cyclopentenyl spirobarbiturates 3

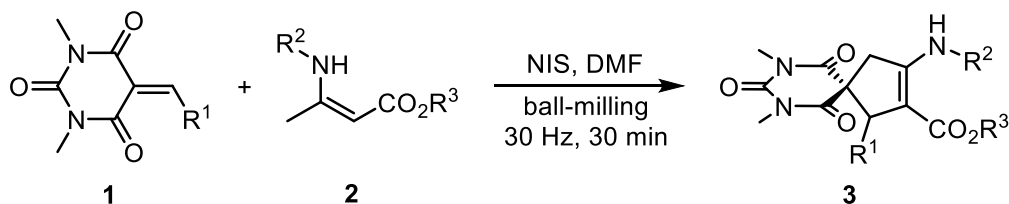

A mixture of unsaturated barbiturates **1** (0.2 mmol), enamino esters **2** (0.24 mmol), NIS (0.24 mmol) and DMF (30  $\mu\text{L}$ ) together with four stainless balls (6 mm in diameter) was introduced into a stainless steel jar (5 mL). The reaction vessel along with another identical empty vessel was closed and fixed on the vibration arms of a Retsch MM400 mixer mill, and was vibrated vigorously at a rate of 1800 rounds per minute (30 Hz) at room temperature for 30 min. After completion of the reaction, the resulting mixture was extracted with ethyl acetate, and the combined solution was evaporated to remove the solvent in vacuo. Then, the residue was separated by flash column chromatography on silica gel with ethyl acetate/petroleum ether as the eluent to afford cyclopentenyl spirobarbiturates **3**.

## 2.2 General procedure for the synthesis of pyrrolinly spirobarbiturates 4

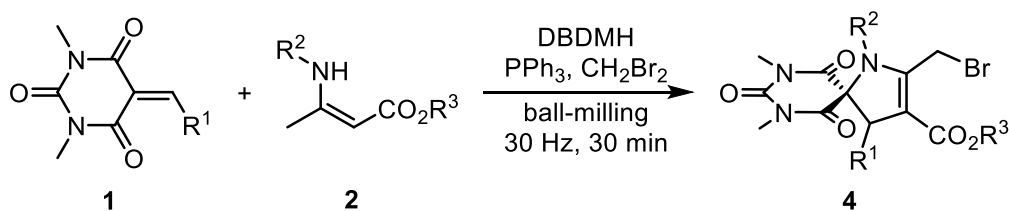

A mixture of unsaturated barbiturates **1** (0.2 mmol), enamino esters **2** (0.24 mmol), DBDMH (0.2 mmol), PPh<sub>3</sub> (0.2 mmol) and CH<sub>2</sub>Br<sub>2</sub> (30  $\mu$ L) together with four stainless balls (6 mm in diameter) was introduced into a stainless steel jar (5 mL). The reaction vessel along with another identical empty vessel was closed and fixed on the vibration arms of a Retsch MM400 mixer mill, and was vibrated vigorously at a rate of 1800 rounds per minute (30 Hz) at room temperature for 30 min. After completion of the reaction, the resulting mixture was extracted with ethyl acetate, and the combined solution was evaporated to remove the solvent in vacuo. Then, the residue was separated by flash column chromatography on silica gel with ethyl acetate/petroleum ether as the eluent to afford pyrrolinly spirobarbiturates **4**.

## 2.3 Procedure for the gram-scale synthesis of 3aa

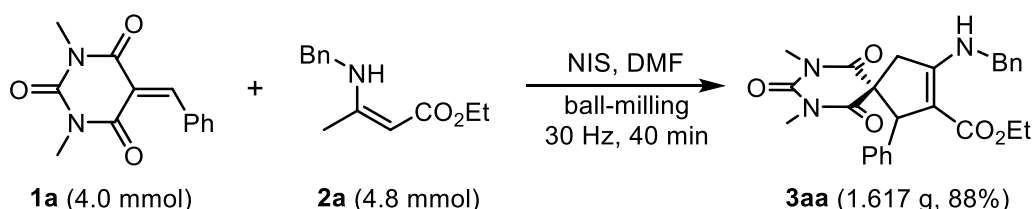

A mixture of unsaturated barbiturate **1a** (0.976 g, 4.0 mmol), enamino ester **2a** (1.051 g, 4.8 mmol), NIS (1.080 g, 4.8 mmol) and DMF (0.6 mL) together with a stainless ball (12 mm in diameter) was introduced into a stainless steel jar (25 mL). The reaction vessel along with another identical empty vessel was closed and fixed on the vibration arms of a Retsch MM400 mixer mill, and was vibrated vigorously at a rate of 1800 rounds per minute (30 Hz) at room temperature for 40 min. After completion of the reaction, the resulting mixture was extracted with ethyl acetate, and the combined solution was evaporated to remove the solvent in vacuo. Then, the residue was separated by flash column chromatography on silica gel with ethyl acetate/petroleum

ether (1/4, v/v) as the eluent to afford **3aa** in 88% yield (1.617 g).

## 2.4 Procedure for the gram-scale synthesis of **4aa**

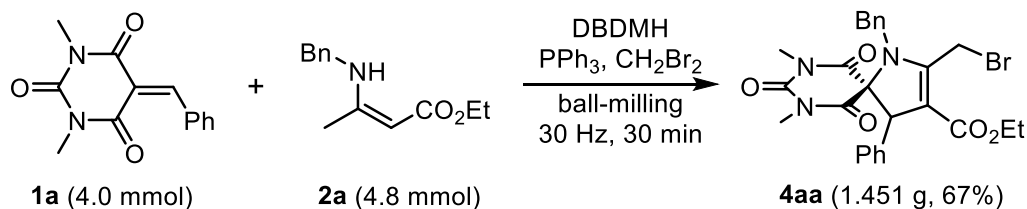

A mixture of unsaturated barbiturate **1a** (0.976 g, 4.0 mmol), enamine ester **2a** (1.051 g, 4.8 mmol), DBDMH (1.144 g, 4.0 mmol), PPh<sub>3</sub> (1.048 g, 4.0 mmol), and CH<sub>2</sub>Br<sub>2</sub> (0.6 mL) together with a stainless ball (12 mm in diameter) was introduced into a stainless steel jar (25 mL). The reaction vessel along with another identical empty vessel was closed and fixed on the vibration arms of a Retsch MM400 mixer mill, and was vibrated vigorously at a rate of 1800 rounds per minute (30 Hz) at room temperature for 40 min. After completion of the reaction, the resulting mixture was extracted with ethyl acetate, and the combined solution was evaporated to remove the solvent in vacuo. Then, the residue was separated by flash column chromatography on silica gel with ethyl acetate/petroleum ether (1/6, v/v) as the eluent to afford **4aa** in 67% yield (1.451 g).

## 2.5 Procedure for the synthesis of **6aa**

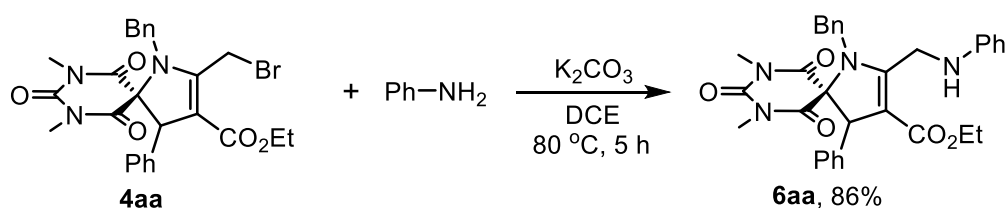

In a 25 mL of glass tube, a mixture of **4aa** (108.1 mg, 0.2 mmol), aniline (37.2 mg, 0.4 mmol), K<sub>2</sub>CO<sub>3</sub> (27.6 mg, 0.2 mmol), and DCE (2 mL) was stirred and heated in an oil bath at 80 °C for 5 h. After cooling, the reaction mixture was filtered under reduced pressure, and then, the solution was concentrated in vacuo. The residue was separated by column chromatography on silica gel with ethyl acetate/petroleum ether (1:4) as the eluent to afford substitution product **6aa** (95.2 mg, 86% yield).

### 3. Characterization data for 3, 4 and 6aa

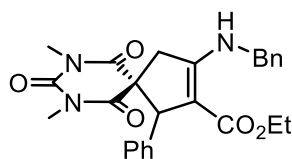

**Ethyl 3-(benzylamino)-7,9-dimethyl-6,8,10-trioxo-1-phenyl-7,9-diazaspiro[4.5]dec-2-ene-2-carboxylate (3aa).** White solid, 91% yield (84.3 mg), mp 157–159 °C;  $^1\text{H}$  NMR (500 MHz,  $\text{CDCl}_3$ )  $\delta$  8.03 (bs, 1H), 7.44–7.37 (m, 4H), 7.34–7.29 (m, 1H), 7.26–7.19 (m, 3H), 7.01 (bs, 2H), 4.56 (d,  $J$  = 6.3 Hz, 2H), 4.47 (s, 1H), 3.93–3.86 (m, 1H), 3.82–3.74 (m, 1H), 3.49 (d,  $J$  = 16.8 Hz, 1H), 3.39 (d,  $J$  = 16.8 Hz, 1H), 3.37 (s, 3H), 2.56 (s, 3H), 0.79 (t,  $J$  = 7.0 Hz, 3H);  $^{13}\text{C}$  NMR (125 MHz,  $\text{CDCl}_3$ )  $\delta$  171.2, 168.7, 167.1, 163.0, 151.2, 139.6, 138.3, 129.0 (2C), 128.1 (2C), 128.0 (2C), 127.9, 127.8, 127.1 (2C), 91.5, 63.1, 60.6, 58.7, 48.6, 35.4, 29.4, 28.4, 14.1; HRMS (ESI-TOF) calcd for  $\text{C}_{26}\text{H}_{28}\text{N}_3\text{O}_5$   $[\text{M} + \text{H}]^+$  462.2029, found 462.2036.

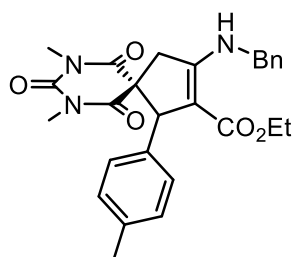

**Ethyl 3-(benzylamino)-7,9-dimethyl-6,8,10-trioxo-1-(p-tolyl)-7,9-diazaspiro[4.5]dec-2-ene-2-carboxylate (3ba).** White solid, 89% yield (84.8 mg), mp 139–141 °C;  $^1\text{H}$  NMR (500 MHz,  $\text{CDCl}_3$ )  $\delta$  8.00 (bs, 1H), 7.43–7.36 (m, 4H), 7.33–7.28 (m, 1H), 7.03 (d,  $J$  = 7.9 Hz, 2H), 6.88 (d,  $J$  = 6.5 Hz, 2H), 4.55 (d,  $J$  = 6.3 Hz, 2H), 4.43 (s, 1H), 3.93–3.77 (m, 2H), 3.48 (d,  $J$  = 16.8 Hz, 1H), 3.36 (s, 3H), 3.35 (d,  $J$  = 16.8 Hz, 1H), 2.58 (s, 3H), 2.29 (s, 3H), 0.82 (t,  $J$  = 7.0 Hz, 3H);  $^{13}\text{C}$  NMR (125 MHz,  $\text{CDCl}_3$ )  $\delta$  171.3, 168.8, 167.1, 162.9, 151.2, 138.4, 137.5, 136.4, 129.0 (2C), 128.7 (2C), 127.8 (2C), 127.7, 127.1 (2C), 91.6, 62.8, 60.6, 58.7, 48.6, 35.2, 29.3, 28.4, 21.2, 14.1; HRMS (ESI-TOF) calcd for  $\text{C}_{27}\text{H}_{30}\text{N}_3\text{O}_5$   $[\text{M} + \text{H}]^+$  476.2185, found 476.2182.

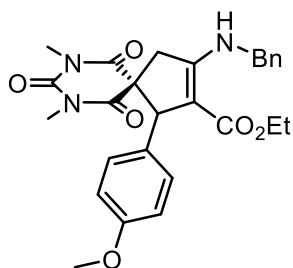

**Ethyl 3-(benzylamino)-1-(4-methoxyphenyl)-7,9-dimethyl-6,8,10-trioxo-7,9-diazaspiro[4.5]dec-2-ene-2-carboxylate (3ca).** White solid, 84% yield (82.2 mg), mp 141–143 °C;  $^1\text{H}$  NMR (500 MHz,  $\text{CDCl}_3$ )  $\delta$  8.00 (bs, 1H), 7.43–7.36 (m, 4H), 7.34–7.28 (m, 1H), 6.92 (d,  $J$  = 7.2 Hz, 2H), 6.77 (d,  $J$  = 8.7 Hz, 2H), 4.55 (d,  $J$  = 6.3 Hz, 2H), 4.42 (s, 1H), 3.94–3.86 (m, 1H), 3.85–3.78 (m, 1H), 3.78–3.75 (m, 3H), 3.49 (d,  $J$  = 16.8 Hz, 1H), 3.35 (d,  $J$  = 16.8 Hz, 1H), 3.37 (s, 3H), 2.63 (s, 3H), 0.84 (t,  $J$  = 7.1 Hz, 3H);  $^{13}\text{C}$  NMR (125 MHz,  $\text{CDCl}_3$ )  $\delta$  171.3, 168.8, 167.1, 162.8, 159.3, 151.3, 138.4, 131.6, 129.1 (2C), 129.0 (2C), 127.8, 127.1 (2C), 113.5 (2C), 91.8, 62.6, 60.6, 58.7, 55.4, 48.6, 35.2, 29.3, 28.6, 14.2; HRMS (ESI-TOF) calcd for  $\text{C}_{27}\text{H}_{30}\text{N}_3\text{O}_6$   $[\text{M} + \text{H}]^+$  492.2135, found 492.2139.

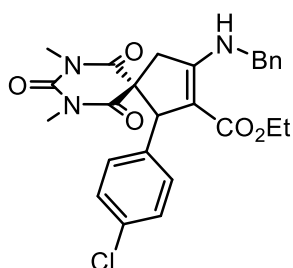

**Ethyl 3-(benzylamino)-1-(4-chlorophenyl)-7,9-dimethyl-6,8,10-trioxo-7,9-diazaspiro[4.5]dec-2-ene-2-carboxylate (3da).** White solid, 92% yield (91.1 mg), mp 156–158 °C;  $^1\text{H}$  NMR (500 MHz,  $\text{CDCl}_3$ )  $\delta$  8.02 (bs, 1H), 7.42–7.36 (m, 4H), 7.34–7.29 (m, 1H), 7.22 (d,  $J$  = 8.7 Hz, 2H), 6.96 (d,  $J$  = 7.4 Hz, 2H), 4.55 (d,  $J$  = 6.3 Hz, 2H), 4.43 (s, 1H), 3.93–3.86 (m, 1H), 3.84–3.77 (m, 1H), 3.49 (d,  $J$  = 16.8 Hz, 1H), 3.374 (d,  $J$  = 16.8 Hz, 1H), 3.372 (s, 3H), 2.64 (s, 3H), 0.83 (t,  $J$  = 7.1 Hz, 3H);  $^{13}\text{C}$  NMR (125 MHz,  $\text{CDCl}_3$ )  $\delta$  171.1, 168.6, 166.9, 163.1, 151.1, 138.3, 138.2, 133.7, 129.4 (2C), 129.1 (2C), 128.3 (2C), 127.9, 127.1 (2C), 91.3, 62.3, 60.3, 58.8, 48.6, 35.5, 29.4, 28.6, 14.2; HRMS (ESI-TOF) calcd for  $\text{C}_{26}\text{H}_{27}\text{ClN}_3\text{O}_5$   $[\text{M} + \text{H}]^+$  496.1639, found 496.1643.

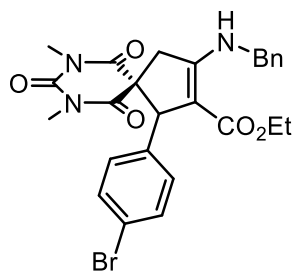

**Ethyl 3-(benzylamino)-1-(4-bromophenyl)-7,9-dimethyl-6,8,10-trioxo-7,9-diazaspiro[4.5]dec-2-ene-2-carboxylate (3ea).** White solid, 91% yield (97.9 mg), mp 151–153 °C;  $^1\text{H}$  NMR (500 MHz,  $\text{CDCl}_3$ )  $\delta$  8.02 (bs, 1H), 7.43–7.34 (m, 6H), 7.33–7.28 (m, 1H), 6.90 (d,  $J = 7.4$  Hz, 2H), 4.55 (d,  $J = 6.3$  Hz, 2H), 4.41 (s, 1H), 3.93–3.86 (m, 1H), 3.85–3.77 (m, 1H), 3.49 (d,  $J = 16.8$  Hz, 1H), 3.370 (d,  $J = 16.8$  Hz, 1H), 3.368 (s, 3H), 2.63 (s, 3H), 0.84 (t,  $J = 7.1$  Hz, 3H);  $^{13}\text{C}$  NMR (125 MHz,  $\text{CDCl}_3$ )  $\delta$  171.0, 168.5, 166.8, 163.2, 151.0, 138.8, 138.2, 131.2 (2C), 129.7 (2C), 129.0 (2C), 127.8, 127.1 (2C), 121.8, 91.2, 62.3, 60.2, 58.8, 48.6, 35.5, 29.4, 28.5, 14.2; HRMS (ESI-TOF) calcd for  $\text{C}_{26}\text{H}_{27}\text{BrN}_3\text{O}_5$   $[\text{M} + \text{H}]^+$  540.1134, found 540.1143.

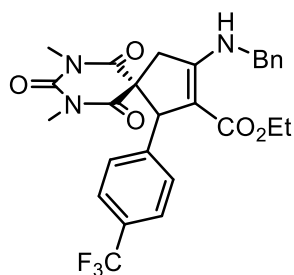

**Ethyl 3-(benzylamino)-7,9-dimethyl-6,8,10-trioxo-1-(4-(trifluoromethyl)phenyl)-7,9-diazaspiro[4.5]dec-2-ene-2-carboxylate (3fa).** White solid, 83% yield (88.0 mg), mp 149–151 °C;  $^1\text{H}$  NMR (500 MHz,  $\text{CDCl}_3$ )  $\delta$  8.05 (bs, 1H), 7.51 (d,  $J = 8.1$  Hz, 2H), 7.44–7.36 (m, 4H), 7.34–7.29 (m, 1H), 7.15 (d,  $J = 7.1$  Hz, 2H), 4.56 (d,  $J = 6.3$  Hz, 2H), 4.51 (s, 1H), 3.93–3.85 (m, 1H), 3.82–3.75 (m, 1H), 3.51 (d,  $J = 16.8$  Hz, 1H), 3.41 (d,  $J = 16.8$  Hz, 1H), 3.38 (s, 3H), 2.55 (s, 3H), 0.79 (t,  $J = 6.8$  Hz, 3H);  $^{13}\text{C}$  NMR (125 MHz,  $\text{CDCl}_3$ )  $\delta$  170.9, 168.4, 166.7, 163.3, 150.9, 144.0, 138.1, 130.2 (q,  $J = 32.5$  Hz), 129.0 (2C), 128.5 (2C), 127.9, 127.1 (2C), 125.0 (q,  $J = 2.8$  Hz, 2C), 124.1 (q,  $J = 272.1$  Hz), 91.0, 62.4, 60.2, 58.8, 48.6, 35.7, 29.4, 28.4, 14.0; HRMS (ESI-TOF) calcd for  $\text{C}_{27}\text{H}_{27}\text{F}_3\text{N}_3\text{O}_5$   $[\text{M} + \text{H}]^+$  530.1903, found 530.1914.

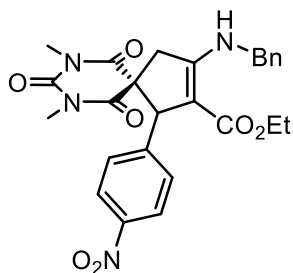

**Ethyl 3-(benzylamino)-7,9-dimethyl-1-(4-nitrophenyl)-6,8,10-trioxo-7,9-diazaspiro[4.5]dec-2-ene-2-carboxylate (3ga).** White solid, 76% yield (77.4 mg), mp 159–161 °C;  $^1\text{H}$  NMR (500 MHz,  $\text{CDCl}_3$ )  $\delta$  8.12 (t,  $J$  = 8.7 Hz, 2H), 8.07 (bs, 1H), 7.46–7.36 (m, 4H), 7.35–7.30 (m, 1H), 7.22 (d,  $J$  = 7.5 Hz, 2H), 4.57 (d,  $J$  = 6.3 Hz, 2H), 4.54 (s, 1H), 3.92–3.77 (m, 2H), 3.53 (d,  $J$  = 16.9 Hz, 1H), 3.41 (d,  $J$  = 16.9 Hz, 1H), 3.39 (s, 3H), 2.62 (s, 3H), 0.81 (t,  $J$  = 6.8 Hz, 3H);  $^{13}\text{C}$  NMR (125 MHz,  $\text{CDCl}_3$ )  $\delta$  170.7, 168.2, 166.5, 163.5, 150.8, 147.5 (2C), 138.0, 129.08 (2C), 129.07 (2C), 127.9, 127.1 (2C), 123.3 (2C), 90.9, 61.9, 60.1, 58.9, 48.7, 35.8, 29.5, 28.5, 14.1; HRMS (ESI-TOF) calcd for  $\text{C}_{26}\text{H}_{27}\text{N}_4\text{O}_7$   $[\text{M} + \text{H}]^+$  507.1880, found 507.1871.

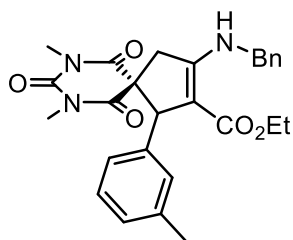

**Ethyl 3-(benzylamino)-7,9-dimethyl-6,8,10-trioxo-1-(*m*-tolyl)-7,9-diazaspiro[4.5]dec-2-ene-2-carboxylate (3ha).** White solid, 91% yield (86.5 mg), mp 141–143 °C;  $^1\text{H}$  NMR (500 MHz,  $\text{CDCl}_3$ )  $\delta$  8.02 (bs, 1H), 7.43–7.37 (m, 4H), 7.34–7.28 (m, 1H), 7.11 (t,  $J$  = 7.6 Hz, 1H), 7.02 (d,  $J$  = 7.5 Hz, 1H), 6.79 (bs, 2H), 4.56 (d,  $J$  = 6.3 Hz, 2H), 4.43 (s, 1H), 3.96–3.88 (m, 1H), 3.83–3.74 (m, 1H), 3.47 (d,  $J$  = 16.7 Hz, 1H), 3.38 (d,  $J$  = 16.7 Hz, 1H), 3.37 (s, 3H), 2.57 (s, 3H), 2.29 (s, 3H), 0.82 (t,  $J$  = 7.0 Hz, 3H);  $^{13}\text{C}$  NMR (125 MHz,  $\text{CDCl}_3$ )  $\delta$  171.2, 168.7, 167.1, 163.0, 151.2, 139.4, 138.4, 137.7, 129.0 (2C), 128.6 (2C), 128.0, 127.8, 127.1 (2C), 125.1, 91.4, 63.1, 60.7, 58.6, 48.6, 35.3, 29.3, 28.4, 21.4, 14.2; HRMS (ESI-TOF) calcd for  $\text{C}_{27}\text{H}_{30}\text{N}_3\text{O}_5$   $[\text{M} + \text{H}]^+$  476.2186, found 476.2191.

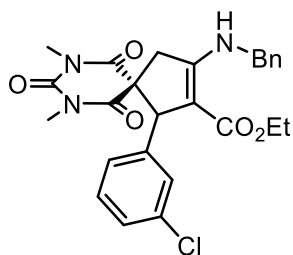

**Ethyl 3-(benzylamino)-1-(3-chlorophenyl)-7,9-dimethyl-6,8,10-trioxo-7,9-diazaspiro[4.5]dec-2-ene-2-carboxylate (3ia).** White solid, 88% yield (87.7 mg), mp 146–148 °C;  $^1\text{H}$  NMR (500 MHz,  $\text{CDCl}_3$ )  $\delta$  8.05 (bs, 1H), 7.44–7.36 (m, 4H), 7.34–7.29 (m, 1H), 7.23–7.15 (m, 2H), 7.02 (s, 1H), 6.90 (bs, 1H), 4.55 (d,  $J = 6.3$  Hz, 2H), 4.42 (s, 1H), 3.97–3.89 (m, 1H), 3.84–3.76 (m, 1H), 3.48 (d,  $J = 16.8$  Hz, 1H), 3.37 (s, 3H), 3.36 (d,  $J = 16.8$  Hz, 1H), 2.66 (s, 3H), 0.84 (t,  $J = 6.9$  Hz, 3H);  $^{13}\text{C}$  NMR (125 MHz,  $\text{CDCl}_3$ )  $\delta$  170.9, 168.4, 166.8, 163.4, 151.0, 141.8, 138.1, 134.2, 129.3, 129.0 (2C), 128.1 (2C), 127.8, 127.1 (2C), 126.2, 90.9, 62.3, 60.4, 58.8, 48.6, 35.4, 29.4, 28.5, 14.2; HRMS (ESI-TOF) calcd for  $\text{C}_{26}\text{H}_{27}\text{ClN}_3\text{O}_5$   $[\text{M} + \text{H}]^+$  496.1639, found 496.1644.

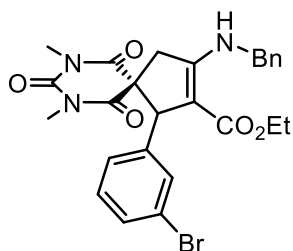

**Ethyl 3-(benzylamino)-1-(3-bromophenyl)-7,9-dimethyl-6,8,10-trioxo-7,9-diazaspiro[4.5]dec-2-ene-2-carboxylate (3ja).** White solid, 85% yield (91.8 mg), mp 136–138 °C;  $^1\text{H}$  NMR (500 MHz,  $\text{CDCl}_3$ )  $\delta$  8.05 (bs, 1H), 7.43–7.35 (m, 5H), 7.34–7.29 (m, 1H), 7.17 (s, 1H), 7.12 (t,  $J = 7.8$  Hz, 1H), 6.95 (bs, 1H), 4.55 (d,  $J = 6.3$  Hz, 2H), 4.41 (s, 1H), 3.98–3.90 (m, 1H), 3.84–3.76 (m, 1H), 3.47 (d,  $J = 16.8$  Hz, 1H), 3.37 (s, 3H), 3.36 (d,  $J = 16.8$  Hz, 1H), 2.66 (s, 3H), 0.84 (t,  $J = 7.0$  Hz, 3H);  $^{13}\text{C}$  NMR (125 MHz,  $\text{CDCl}_3$ )  $\delta$  170.9, 168.4, 166.8, 163.4, 151.0, 142.1, 138.1, 131.0 (2C), 129.6, 129.0 (2C), 127.8, 127.1 (2C), 126.7, 122.3, 90.8, 62.3, 60.4, 58.8, 48.6, 35.4, 29.4, 28.6, 14.2; HRMS (ESI-TOF) calcd for  $\text{C}_{26}\text{H}_{27}\text{BrN}_3\text{O}_5$   $[\text{M} + \text{H}]^+$  540.1134, found 540.1138.

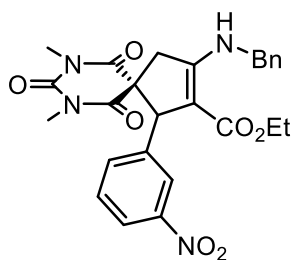

**Ethyl 3-(benzylamino)-7,9-dimethyl-1-(3-nitrophenyl)-6,8,10-trioxo-7,9-diazaspiro[4.5]dec-2-ene-2-carboxylate (3ka).** White solid, 73% yield (73.7 mg), mp 156–158 °C;  $^1\text{H}$  NMR (500 MHz,  $\text{CDCl}_3$ )  $\delta$  8.15–8.08 (m, 1H), 8.08 (bs, 1H), 7.91 (s, 1H), 7.48–7.35 (m, 6H), 7.35–7.30 (m, 1H), 4.58 (d,  $J$  = 6.3 Hz, 2H), 4.55 (s, 1H), 3.94–3.77 (m, 2H), 3.52 (d,  $J$  = 16.8 Hz, 1H), 3.39 (s, 3H), 3.38 (d,  $J$  = 16.8 Hz, 1H), 2.62 (s, 3H), 0.82 (t,  $J$  = 6.1 Hz, 3H);  $^{13}\text{C}$  NMR (125 MHz,  $\text{CDCl}_3$ )  $\delta$  170.7, 168.2, 166.5, 163.7, 150.8, 148.1, 142.2, 138.0, 134.1, 129.1 (2C), 129.0, 127.9, 127.0 (2C), 123.0 (2C), 90.6, 61.9, 60.1, 58.9, 48.7, 35.6, 29.5, 28.6, 14.2; HRMS (ESI-TOF) calcd for  $\text{C}_{26}\text{H}_{27}\text{N}_4\text{O}_7$   $[\text{M} + \text{H}]^+$  507.1880, found 507.1883.

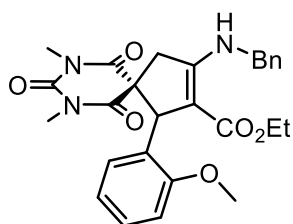

**Ethyl 3-(benzylamino)-1-(2-methoxyphenyl)-7,9-dimethyl-6,8,10-trioxo-7,9-diazaspiro[4.5]dec-2-ene-2-carboxylate (3la).** White solid, 82% yield (80.8 mg), mp 203–205 °C;  $^1\text{H}$  NMR (500 MHz,  $\text{CDCl}_3$ )  $\delta$  7.97 (bs, 1H), 7.42–7.36 (m, 4H), 7.33–7.28 (m, 1H), 7.16 (td,  $J$  = 7.8, 1.6 Hz, 1H), 7.04 (dd,  $J$  = 7.6, 1.4 Hz, 1H), 6.85 (t,  $J$  = 7.5 Hz, 1H), 6.78 (d,  $J$  = 8.2 Hz, 1H), 5.14 (s, 1H), 4.54 (d,  $J$  = 6.3 Hz, 2H), 3.96–3.89 (m, 1H), 3.81–3.74 (m, 1H), 3.74–3.71 (m, 3H), 3.54 (d,  $J$  = 16.9 Hz, 1H), 3.36 (s, 3H), 3.33 (d,  $J$  = 16.9 Hz, 1H), 2.60 (s, 3H), 0.80 (t,  $J$  = 7.0 Hz, 3H);  $^{13}\text{C}$  NMR (125 MHz,  $\text{CDCl}_3$ )  $\delta$  171.7, 169.1, 167.0, 162.7, 156.6, 151.5, 138.5, 129.5, 129.0 (2C), 128.6, 127.9, 127.7, 127.1 (2C), 120.5, 109.4, 91.5, 59.3, 58.6, 55.8, 53.8, 48.6, 36.2, 29.2, 28.3, 14.1; HRMS (ESI-TOF) calcd for  $\text{C}_{27}\text{H}_{30}\text{N}_3\text{O}_6$   $[\text{M} + \text{H}]^+$  492.2135, found 492.2133.

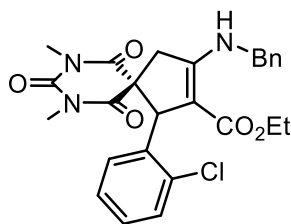

**Ethyl 3-(benzylamino)-1-(2-chlorophenyl)-7,9-dimethyl-6,8,10-trioxo-7,9-diazaspiro[4.5]dec-2-ene-2-carboxylate (3ma).** White solid, 87% yield (86.0 mg), mp 173–175 °C;  $^1\text{H}$  NMR (500 MHz,  $\text{CDCl}_3$ )  $\delta$  7.98 (bs, 1H), 7.43–7.37 (m, 4H), 7.34–7.28 (m, 2H), 7.19–7.11 (m, 3H), 5.18 (s, 1H), 4.55 (d,  $J$  = 6.3 Hz, 2H), 3.90–3.83 (m, 1H), 3.82–3.75 (m, 1H), 3.55 (d,  $J$  = 16.8 Hz, 1H), 3.36 (d,  $J$  = 16.8 Hz, 1H), 3.34 (s, 3H), 2.66 (s, 3H), 0.80 (t,  $J$  = 7.0 Hz, 3H);  $^{13}\text{C}$  NMR (125 MHz,  $\text{CDCl}_3$ )  $\delta$  171.0, 168.8, 166.8, 163.0, 151.1, 138.3, 137.3, 133.7, 130.4, 129.02 (2C), 128.96, 128.8, 127.8, 127.1 (2C), 126.7, 92.0, 59.4, 58.7, 57.0, 48.6, 36.2, 29.4, 28.5, 14.0; HRMS (ESI-TOF) calcd for  $\text{C}_{26}\text{H}_{27}\text{ClN}_3\text{O}_5$   $[\text{M} + \text{H}]^+$  496.1639, found 496.1648.

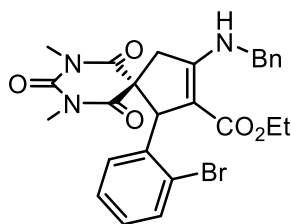

**Ethyl 3-(benzylamino)-1-(2-bromophenyl)-7,9-dimethyl-6,8,10-trioxo-7,9-diazaspiro[4.5]dec-2-ene-2-carboxylate (3na).** White solid, 86% yield (92.9 mg), mp 167–169 °C;  $^1\text{H}$  NMR (500 MHz,  $\text{CDCl}_3$ )  $\delta$  7.97 (bs, 1H), 7.48 (d,  $J$  = 7.9 Hz, 1H), 7.43–7.36 (m, 4H), 7.34–7.29 (m, 1H), 7.20 (t,  $J$  = 7.4 Hz, 1H), 7.11 (dd,  $J$  = 7.8, 1.5 Hz, 1H), 7.06 (td,  $J$  = 7.6, 1.6 Hz, 1H), 5.17 (s, 1H), 4.55 (dd,  $J$  = 6.3, 2.1 Hz, 2H), 3.89–3.76 (m, 2H), 3.57 (d,  $J$  = 16.8 Hz, 1H), 3.35 (s, 3H), 3.34 (d,  $J$  = 16.8 Hz, 1H), 2.66 (s, 3H), 0.81 (t,  $J$  = 7.0 Hz, 3H);  $^{13}\text{C}$  NMR (125 MHz,  $\text{CDCl}_3$ )  $\delta$  170.9, 168.8, 166.7, 162.9, 151.1, 139.0, 138.3, 132.3, 130.6, 129.1, 129.0 (2C), 127.8, 127.2, 127.1 (2C), 124.6, 92.6, 59.8, 59.4, 58.7, 48.6, 36.2, 29.4, 28.5, 14.0; HRMS (ESI-TOF) calcd for  $\text{C}_{26}\text{H}_{27}\text{BrN}_3\text{O}_5$   $[\text{M} + \text{H}]^+$  540.1134, found 540.1131.

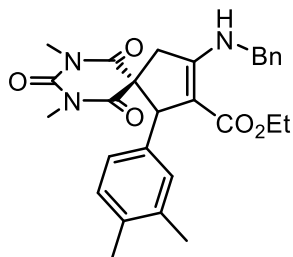

**Ethyl 3-(benzylamino)-1-(3,4-dimethylphenyl)-7,9-dimethyl-6,8,10-trioxo-7,9-diazaspiro[4.5]dec-2-ene-2-carboxylate (30a).** White solid, 90% yield (88.1 mg), mp 131–133 °C;  $^1\text{H}$  NMR (500 MHz,  $\text{CDCl}_3$ )  $\delta$  7.99 (bs, 1H), 7.43–7.37 (m, 4H), 7.34–7.28 (m, 1H), 6.98 (d,  $J = 7.7$  Hz, 1H), 6.78–6.66 (m, 2H), 4.55 (d,  $J = 6.3$  Hz, 2H), 4.41 (s, 1H), 3.95–3.87 (m, 1H), 3.86–3.79 (m, 1H), 3.47 (d,  $J = 16.8$  Hz, 1H), 3.37 (s, 3H), 3.34 (d,  $J = 16.8$  Hz, 1H), 2.58 (s, 3H), 2.20 (s, 3H), 2.19 (s, 3H), 0.85 (t,  $J = 6.9$  Hz, 3H);  $^{13}\text{C}$  NMR (125 MHz,  $\text{CDCl}_3$ )  $\delta$  171.3, 168.8, 167.2, 162.9, 151.3, 138.4, 136.7, 136.2, 136.1, 129.3, 129.0 (3C), 127.7, 127.1 (2C), 125.4, 91.6, 62.8, 60.8, 58.7, 48.6, 35.2, 29.3, 28.5, 19.8, 19.5, 14.2; HRMS (ESI-TOF) calcd for  $\text{C}_{28}\text{H}_{32}\text{N}_3\text{O}_5$   $[\text{M} + \text{H}]^+$  490.2342, found 490.2345.

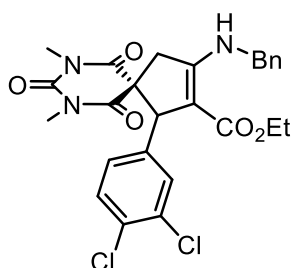

**Ethyl 3-(benzylamino)-1-(3,4-dichlorophenyl)-7,9-dimethyl-6,8,10-trioxo-7,9-diazaspiro[4.5]dec-2-ene-2-carboxylate (3pa).** White solid, 88% yield (93.7 mg), mp 167–169 °C;  $^1\text{H}$  NMR (500 MHz,  $\text{CDCl}_3$ )  $\delta$  8.05 (bs, 1H), 7.44–7.35 (m, 4H), 7.35–7.29 (m, 2H), 7.12 (s, 1H), 6.87 (d,  $J = 5.9$  Hz, 1H), 4.55 (d,  $J = 6.3$  Hz, 2H), 4.39 (s, 1H), 3.96–3.89 (m, 1H), 3.87–3.79 (m, 1H), 3.48 (d,  $J = 16.9$  Hz, 1H), 3.37 (s, 3H), 3.34 (d,  $J = 16.9$  Hz, 1H), 2.71 (s, 3H), 0.88 (t,  $J = 6.9$  Hz, 3H);  $^{13}\text{C}$  NMR (125 MHz,  $\text{CDCl}_3$ )  $\delta$  170.8, 168.3, 166.7, 163.4, 150.9, 140.2, 138.0, 132.4, 131.8, 130.0, 129.9, 129.0 (2C), 127.9, 127.4, 127.1 (2C), 90.7, 61.6, 60.2, 58.9, 48.6, 35.4, 29.4, 28.6, 14.2; HRMS (ESI-TOF) calcd for  $\text{C}_{26}\text{H}_{26}\text{Cl}_2\text{N}_3\text{O}_5$   $[\text{M} + \text{H}]^+$  530.1250, found 530.1258.

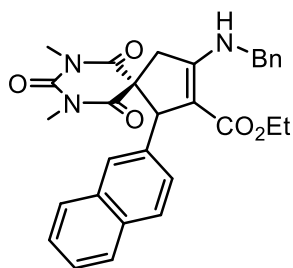

**Ethyl 3-(benzylamino)-7,9-dimethyl-1-(naphthalen-2-yl)-6,8,10-trioxo-7,9-diazaspiro[4.5]dec-2-ene-2-carboxylate (3qa).** White solid, 83% yield (85.2 mg), mp 170–172 °C;  $^1\text{H}$  NMR (500 MHz,  $\text{CDCl}_3$ )  $\delta$  8.09 (bs, 1H), 7.80–7.74 (m, 2H), 7.72 (d,  $J = 8.5$  Hz, 1H), 7.51–7.38 (m, 7H), 7.35–7.29 (m, 1H), 7.14 (bs, 1H), 4.64 (s, 1H), 4.59 (d,  $J = 6.3$  Hz, 2H), 3.86–3.74 (m, 2H), 3.56 (d,  $J = 16.8$  Hz, 1H), 3.41 (d,  $J = 16.8$  Hz, 1H), 3.40 (s, 3H), 2.36 (s, 3H), 0.71 (t,  $J = 6.9$  Hz, 3H);  $^{13}\text{C}$  NMR (125 MHz,  $\text{CDCl}_3$ )  $\delta$  171.2, 168.6, 167.1, 163.2, 151.1, 138.3, 137.1, 133.1, 133.0, 129.0 (2C), 127.9, 127.8, 127.68, 127.65, 127.1 (2C), 127.0, 126.2, 126.0 (2C), 91.5, 63.0, 60.6, 58.7, 48.6, 35.4, 29.4, 28.4, 14.1; HRMS (ESI-TOF) calcd for  $\text{C}_{30}\text{H}_{30}\text{N}_3\text{O}_5$   $[\text{M} + \text{H}]^+$  512.2186, found 512.2181.

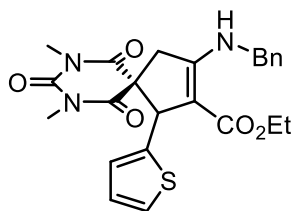

**Ethyl 3-(benzylamino)-7,9-dimethyl-6,8,10-trioxo-1-(thiophen-2-yl)-7,9-diazaspiro[4.5]dec-2-ene-2-carboxylate (3ra).** White solid, 51% yield (47.3 mg), mp e–148 °C;  $^1\text{H}$  NMR (500 MHz,  $\text{CDCl}_3$ )  $\delta$  8.03 (bs, 1H), 7.42–7.36 (m, 4H), 7.33–7.28 (m, 1H), 7.16 (d,  $J = 5.0$  Hz, 1H), 6.92–6.88 (m, 1H), 6.73 (d,  $J = 3.0$  Hz, 1H), 4.73 (s, 1H), 4.55 (d,  $J = 6.3$  Hz, 2H), 4.01–3.94 (m, 1H), 3.89–3.81 (m, 1H), 3.54 (d,  $J = 16.8$  Hz, 1H), 3.37 (s, 3H), 3.29 (d,  $J = 16.8$  Hz, 1H), 2.83 (s, 3H), 0.90 (t,  $J = 6.9$  Hz, 3H);  $^{13}\text{C}$  NMR (125 MHz,  $\text{CDCl}_3$ )  $\delta$  170.8, 168.3, 166.9, 162.9, 151.2, 144.2, 138.2, 129.0 (2C), 127.7, 127.0 (2C), 126.7, 125.5, 125.0, 92.1, 60.7, 58.8, 56.9, 48.5, 34.8, 29.4, 28.8, 14.2; HRMS (ESI-TOF) calcd for  $\text{C}_{24}\text{H}_{26}\text{N}_3\text{O}_5\text{S}$   $[\text{M} + \text{H}]^+$  468.1593, found 468.1594.

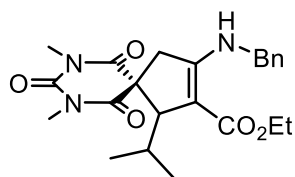

**Ethyl 3-(benzylamino)-1-isopropyl-7,9-dimethyl-6,8,10-trioxo-7,9-diazaspiro[4.5]dec-2-ene-2-carboxylate (3sa).** White solid, 46% yield (39.5 mg), mp 80–82 °C;  $^1\text{H}$  NMR (500 MHz,  $\text{CDCl}_3$ )  $\delta$  8.12 (bs, 1H), 7.39–7.32 (m, 4H), 7.30–7.24 (m, 1H), 4.52 (dd,  $J = 15.6, 6.6$  Hz, 1H), 4.47 (dd,  $J = 15.6, 6.3$  Hz, 1H), 4.18–4.11 (m, 1H), 4.04–3.97 (m, 1H), 3.47 (d,  $J = 16.7$  Hz, 1H), 3.30 (s, 3H), 3.29 (s, 3H), 3.23 (t,  $J = 5.9$  Hz, 1H), 2.90 (d,  $J = 16.7$  Hz, 1H), 1.74–1.66 (m, 1H), 1.21 (t,  $J = 7.1$  Hz, 3H), 0.94 (d,  $J = 7.0$  Hz, 3H), 0.82 (d,  $J = 6.7$  Hz, 3H);  $^{13}\text{C}$  NMR (125 MHz,  $\text{CDCl}_3$ )  $\delta$  171.2, 169.4, 167.9, 163.8, 151.6, 138.5, 128.8 (2C), 127.6, 126.9 (2C), 89.8, 60.73, 60.69, 58.8, 48.5, 34.9, 32.9, 29.4, 29.2, 22.7, 18.3, 14.5; HRMS (ESI-TOF) calcd for  $\text{C}_{23}\text{H}_{30}\text{N}_3\text{O}_5$   $[\text{M} + \text{H}]^+$  428.2185, found 428.2188.

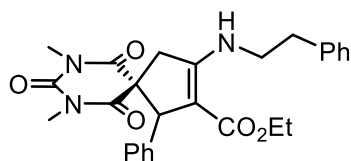

**Ethyl 7,9-dimethyl-6,8,10-trioxo-3-(phenethylamino)-1-phenyl-7,9-diazaspiro[4.5]dec-2-ene-2-carboxylate (3ab).** White solid, 89% yield (84.4 mg), mp 97–99 °C;  $^1\text{H}$  NMR (500 MHz,  $\text{CDCl}_3$ )  $\delta$  7.71 (bs, 1H), 7.35 (t,  $J = 7.4$  Hz, 2H), 7.29–7.18 (m, 6H), 7.00–6.93 (m, 2H), 4.42 (s, 1H), 3.92–3.85 (m, 1H), 3.81–3.73 (m, 1H), 3.61–3.55 (m, 2H), 3.40 (d,  $J = 16.7$  Hz, 1H), 3.37 (s, 3H), 3.31 (d,  $J = 16.7$  Hz, 1H), 3.02–2.92 (m, 2H), 2.57 (s, 3H), 0.78 (t,  $J = 7.0$  Hz, 3H);  $^{13}\text{C}$  NMR (125 MHz,  $\text{CDCl}_3$ )  $\delta$  171.2, 168.7, 166.9, 162.8, 151.2, 139.6, 138.4, 128.9 (2C), 128.8 (2C), 128.1 (2C), 128.0 (2C), 127.9, 126.8, 91.0, 63.0, 60.5, 58.6, 46.4, 37.6, 35.1, 29.3, 28.4, 14.1; HRMS (ESI-TOF) calcd for  $\text{C}_{27}\text{H}_{30}\text{N}_3\text{O}_5$   $[\text{M} + \text{H}]^+$  476.2186, found 476.2192.

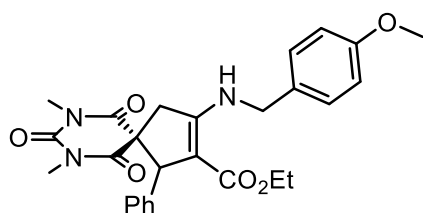

**Ethyl 3-((4-methoxybenzyl)amino)-7,9-dimethyl-6,8,10-trioxo-1-phenyl-7,9-**

**diazaspiro[4.5]dec-2-ene-2-carboxylate (3ac).** White solid, 90% yield (88.2 mg), mp 128–130 °C;  $^1\text{H}$  NMR (500 MHz,  $\text{CDCl}_3$ )  $\delta$  7.95 (bs, 1H), 7.31 (d,  $J = 8.6$  Hz, 2H), 7.25–7.19 (m, 3H), 7.01 (bs, 2H), 6.92 (d,  $J = 8.6$  Hz, 2H), 4.48 (d,  $J = 6.2$  Hz, 2H), 4.46 (s, 1H), 3.92–3.85 (m, 1H), 3.80 (d,  $J = 6.4$  Hz, 3H), 3.80–3.73 (m, 1H), 3.49 (d,  $J = 16.8$  Hz, 1H), 3.40 (d,  $J = 16.8$  Hz, 1H), 3.37 (s, 3H), 2.56 (s, 3H), 0.78 (t,  $J = 7.0$  Hz, 3H);  $^{13}\text{C}$  NMR (125 MHz,  $\text{CDCl}_3$ )  $\delta$  171.2, 168.7, 167.0, 163.0, 159.2, 151.1, 139.6, 130.3, 128.4 (2C), 128.1 (2C), 127.94 (2C), 127.87, 114.3 (2C), 91.2, 63.0, 60.6, 58.6, 55.4, 48.0, 35.4, 29.3, 28.4, 14.0; HRMS (ESI-TOF) calcd for  $\text{C}_{27}\text{H}_{30}\text{N}_3\text{O}_6$   $[\text{M} + \text{H}]^+$  492.2135, found 492.2129.

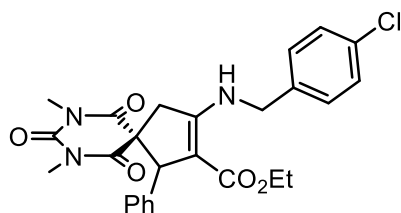

**Ethyl 3-((4-chlorobenzyl)amino)-7,9-dimethyl-6,8,10-trioxo-1-phenyl-7,9-diazaspiro[4.5]dec-2-ene-2-carboxylate (3ad).** White solid, 87% yield (86.5 mg), mp 130–132 °C;  $^1\text{H}$  NMR (500 MHz,  $\text{CDCl}_3$ )  $\delta$  8.02 (bs, 1H), 7.38 (d,  $J = 8.5$  Hz, 2H), 7.33 (d,  $J = 8.5$  Hz, 2H), 7.26–7.20 (m, 3H), 7.08–6.93 (m, 2H), 4.52 (d,  $J = 6.4$  Hz, 2H), 4.46 (s, 1H), 3.94–3.86 (m, 1H), 3.82–3.74 (m, 1H), 3.46 (d,  $J = 16.7$  Hz, 1H), 3.37 (s, 3H), 3.36 (d,  $J = 16.7$  Hz, 1H), 2.56 (s, 3H), 0.79 (t,  $J = 7.1$  Hz, 3H);  $^{13}\text{C}$  NMR (125 MHz,  $\text{CDCl}_3$ )  $\delta$  171.2, 168.7, 167.1, 162.9, 151.1, 139.4, 137.0, 133.6, 129.2 (2C), 128.4 (2C), 128.2 (2C), 128.0 (3C), 91.9, 63.1, 60.6, 58.8, 47.9, 35.4, 29.4, 28.5, 14.1; HRMS (ESI-TOF) calcd for  $\text{C}_{26}\text{H}_{27}\text{ClN}_3\text{O}_5$   $[\text{M} + \text{H}]^+$  496.1639, found 496.1647.

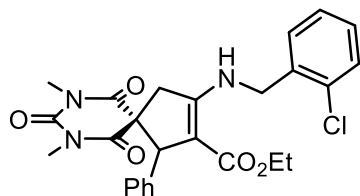

**Ethyl 3-((2-chlorobenzyl)amino)-7,9-dimethyl-6,8,10-trioxo-1-phenyl-7,9-diazaspiro[4.5]dec-2-ene-2-carboxylate (3ae).** White solid, 81% yield (80.4 mg), mp 146–148 °C;  $^1\text{H}$  NMR (500 MHz,  $\text{CDCl}_3$ )  $\delta$  8.08 (bs, 1H), 7.51 (d,  $J = 7.5$  Hz, 1H), 7.40 (d,  $J = 7.9$  Hz, 1H), 7.36 (t,  $J = 7.5$  Hz, 1H), 7.28 (d,  $J = 7.2$  Hz, 1H), 7.26–7.19

(m, 3H), 7.01 (bs, 2H), 4.63 (d,  $J = 6.7$  Hz, 2H), 4.47 (s, 1H), 3.95–3.87 (m, 1H), 3.83–3.76 (m, 1H), 3.49 (d,  $J = 16.8$  Hz, 1H), 3.38 (d,  $J = 16.8$  Hz, 1H), 3.37 (s, 3H), 2.55 (s, 3H), 0.80 (t,  $J = 7.0$  Hz, 3H);  $^{13}\text{C}$  NMR (125 MHz,  $\text{CDCl}_3$ )  $\delta$  171.2, 168.6, 167.1, 162.9, 151.1, 139.4, 136.0, 132.9, 129.7, 129.0, 128.6, 128.1 (2C), 127.9 (3C), 127.5, 91.9, 63.1, 60.5, 58.7, 46.3, 35.2, 29.3, 28.4, 14.1; HRMS (ESI-TOF) calcd for  $\text{C}_{26}\text{H}_{27}\text{ClN}_3\text{O}_5$   $[\text{M} + \text{H}]^+$  496.1639, found 496.1643.

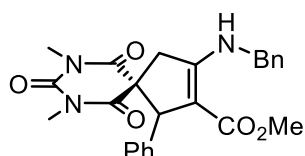

**Methyl** **3-(benzylamino)-7,9-dimethyl-6,8,10-trioxo-1-phenyl-7,9-diazaspiro[4.5]dec-2-ene-2-carboxylate (3af).** White solid, 92% yield (82.3 mg), mp 190–192 °C;  $^1\text{H}$  NMR (500 MHz,  $\text{CDCl}_3$ )  $\delta$  8.07 (bs, 1H), 7.44–7.36 (m, 4H), 7.34–7.28 (m, 1H), 7.27–7.20 (m, 3H), 7.01 (bs, 2H), 4.56 (d,  $J = 6.3$  Hz, 2H), 4.47 (s, 1H), 3.50 (d,  $J = 16.8$  Hz, 1H), 3.38 (s, 3H), 3.37 (s, 3H), 3.34 (d,  $J = 16.8$  Hz, 1H), 2.57 (s, 3H);  $^{13}\text{C}$  NMR (125 MHz,  $\text{CDCl}_3$ )  $\delta$  171.2, 168.6, 167.5, 163.4, 151.1, 139.3, 138.3, 129.0 (2C), 128.2 (2C), 128.0, 127.9 (2C), 127.8, 127.1 (2C), 91.1, 62.8, 60.6, 50.3, 48.6, 35.3, 29.3, 28.5; HRMS (ESI-TOF) calcd for  $\text{C}_{25}\text{H}_{26}\text{N}_3\text{O}_5$   $[\text{M} + \text{H}]^+$  448.1873, found 448.1879.

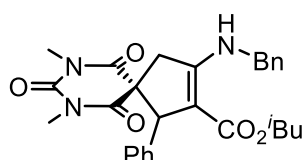

**Isobutyl** **3-(benzylamino)-7,9-dimethyl-6,8,10-trioxo-1-phenyl-7,9-diazaspiro[4.5]dec-2-ene-2-carboxylate (3ag).** White solid, 86% yield (84.1 mg), mp 160–162 °C;  $^1\text{H}$  NMR (500 MHz,  $\text{CDCl}_3$ )  $\delta$  8.09 (bs, 1H), 7.45–7.35 (m, 4H), 7.33–7.28 (m, 1H), 7.27–7.17 (m, 3H), 7.02 (bs, 2H), 4.55 (d,  $J = 6.3$  Hz, 2H), 4.47 (s, 1H), 3.72 (dd,  $J = 10.5, 6.4$  Hz, 1H), 3.49 (d,  $J = 17.1$  Hz, 1H), 3.50–3.44 (m, 1H), 3.39 (d,  $J = 17.1$  Hz, 1H), 3.37 (s, 3H), 2.55 (s, 3H), 1.48–1.38 (m, 1H), 0.43 (d,  $J = 6.7$  Hz, 6H);  $^{13}\text{C}$  NMR (125 MHz,  $\text{CDCl}_3$ )  $\delta$  171.3, 168.7, 167.2, 163.2, 151.1, 139.5, 138.3, 129.0 (2C), 128.2 (2C), 128.0 (3C), 127.7, 127.1 (2C), 91.3, 69.0, 63.1, 60.5, 48.5, 35.4, 29.3, 28.4, 27.6, 18.68, 18.66; HRMS (ESI-TOF) calcd for  $\text{C}_{28}\text{H}_{32}\text{N}_3\text{O}_5$   $[\text{M} + \text{H}]^+$

490.2342, found 490.2338.

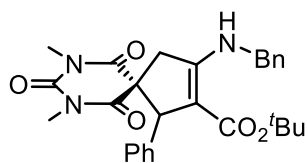

**tert-Butyl 3-(benzylamino)-7,9-dimethyl-6,8,10-trioxo-1-phenyl-7,9-diazaspiro[4.5]dec-2-ene-2-carboxylate (3ah).** White solid, 85% yield (83.0 mg), mp 143–145 °C;  $^1\text{H}$  NMR (500 MHz,  $\text{CDCl}_3$ )  $\delta$  7.97 (bs, 1H), 7.43–7.36 (m, 4H), 7.33–7.28 (m, 1H), 7.26–7.19 (m, 3H), 7.01 (bs, 2H), 4.53 (d,  $J = 6.4$  Hz, 2H), 4.42 (s, 1H), 3.45 (d,  $J = 17.7$  Hz, 1H), 3.41 (d,  $J = 17.7$  Hz, 1H), 3.37 (s, 3H), 2.53 (s, 3H), 1.03 (s, 9H);  $^{13}\text{C}$  NMR (125 MHz,  $\text{CDCl}_3$ )  $\delta$  171.3, 168.9, 166.9, 162.3, 151.1, 140.0, 138.5, 128.9 (2C), 128.0 (4C), 127.8, 127.7, 127.2 (2C), 92.7, 78.8, 63.6, 60.4, 48.5, 35.5, 29.3, 28.3, 28.1 (3C); HRMS (ESI-TOF) calcd for  $\text{C}_{28}\text{H}_{32}\text{N}_3\text{O}_5$   $[\text{M} + \text{H}]^+$  490.2342, found 490.2347.

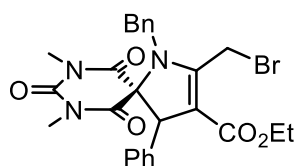

**Ethyl 1-benzyl-2-(bromomethyl)-7,9-dimethyl-6,8,10-trioxo-4-phenyl-1,7,9-triazaspiro[4.5]dec-2-ene-3-carboxylate (4aa).** White solid, 78% yield (84.5 mg), mp 133–135 °C;  $^1\text{H}$  NMR (500 MHz,  $\text{CDCl}_3$ )  $\delta$  7.46 (d,  $J = 7.2$  Hz, 2H), 7.34–7.22 (m, 6H), 7.15 (bs, 1H), 6.91 (bs, 1H), 4.66 (d,  $J = 9.4$  Hz, 1H), 4.61 (s, 1H), 4.58 (d,  $J = 14.5$  Hz, 1H), 4.53 (d,  $J = 9.4$  Hz, 1H), 4.48 (d,  $J = 14.5$  Hz, 1H), 4.02–3.94 (m, 1H), 3.89–3.81 (m, 1H), 3.23 (s, 3H), 2.56 (s, 3H), 0.86 (t,  $J = 7.1$  Hz, 3H);  $^{13}\text{C}$  NMR (125 MHz,  $\text{CDCl}_3$ )  $\delta$  168.5, 165.2, 164.4, 159.5, 150.0, 136.7, 134.8, 129.7 (2C), 128.6 (3C), 128.53 (2C), 128.50 (2C), 128.4, 100.7, 79.7, 61.1, 59.4, 50.7, 29.3, 28.4, 19.9, 14.0; HRMS (ESI-TOF) calcd for  $\text{C}_{26}\text{H}_{27}\text{BrN}_3\text{O}_5$   $[\text{M} + \text{H}]^+$  540.1134, found 540.1130.

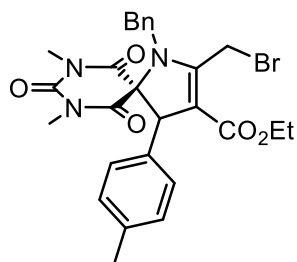

**Ethyl 1-benzyl-2-(bromomethyl)-7,9-dimethyl-6,8,10-trioxo-4-(p-tolyl)-1,7,9-triazaspiro[4.5]dec-2-ene-3-carboxylate (4ba).** White solid, 69% yield (76.9 mg), mp 66–68 °C;  $^1\text{H}$  NMR (500 MHz,  $\text{CDCl}_3$ )  $\delta$  7.47 (d,  $J$  = 6.9 Hz, 2H), 7.34–7.25 (m, 3H), 7.06 (bs, 3H), 6.80 (bs, 1H), 4.67 (d,  $J$  = 9.0 Hz, 1H), 4.58–4.45 (m, 4H), 4.01–3.94 (m, 1H), 3.92–3.84 (m, 1H), 3.23 (s, 3H), 2.59 (s, 3H), 2.29 (s, 3H), 0.90 (t,  $J$  = 7.1 Hz, 3H);  $^{13}\text{C}$  NMR (125 MHz,  $\text{CDCl}_3$ )  $\delta$  168.5, 165.3, 164.4, 159.2, 150.1, 138.1, 135.0, 133.6, 129.6 (2C), 129.0 (2C), 128.6 (2C), 128.5, 128.3 (2C), 101.0, 79.8, 60.8, 59.4, 50.7, 29.3, 28.4, 21.2, 20.0, 14.0; HRMS (ESI-TOF) calcd for  $\text{C}_{27}\text{H}_{29}\text{BrN}_3\text{O}_5$   $[\text{M} + \text{H}]^+$  554.1291, found 554.1285.

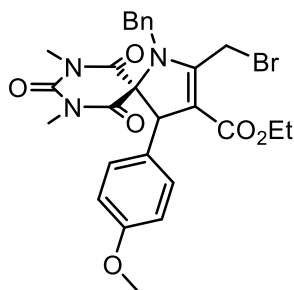

**Ethyl 1-benzyl-2-(bromomethyl)-4-(4-methoxyphenyl)-7,9-dimethyl-6,8,10-trioxo-1,7,9-triazaspiro[4.5]dec-2-ene-3-carboxylate (4ca).** White solid, 62% yield (70.6 mg), mp 66–68 °C;  $^1\text{H}$  NMR (500 MHz,  $\text{CDCl}_3$ )  $\delta$  7.46 (d,  $J$  = 7.2 Hz, 2H), 7.33–7.25 (m, 3H), 7.06 (bs, 1H), 6.80 (bs, 3H), 4.67 (d,  $J$  = 9.6 Hz, 1H), 4.58–4.46 (m, 2H), 4.02–3.94 (m, 1H), 3.91–3.84 (m, 1H), 3.77 (s, 3H), 3.22 (s, 3H), 2.63 (s, 3H), 0.92 (t,  $J$  = 7.1 Hz, 3H);  $^{13}\text{C}$  NMR (125 MHz,  $\text{CDCl}_3$ )  $\delta$  168.5, 165.4, 164.4, 159.6, 159.2, 150.1, 134.9, 129.7 (4C), 128.7, 128.6 (2C), 128.5, 113.7 (2C), 101.1, 79.7, 60.5, 59.4, 55.4, 50.7, 29.3, 28.5, 20.0, 14.1; HRMS (ESI-TOF) calcd for  $\text{C}_{27}\text{H}_{29}\text{BrN}_3\text{O}_6$   $[\text{M} + \text{H}]^+$  570.1240, found 570.1233.

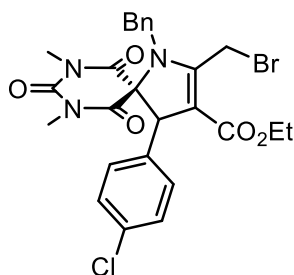

**Ethyl 1-benzyl-2-(bromomethyl)-4-(4-chlorophenyl)-7,9-dimethyl-6,8,10-trioxo-1,7,9-triazaspiro[4.5]dec-2-ene-3-carboxylate (4da).** White solid, 73% yield (84.5

mg), mp 132–134 °C;  $^1\text{H}$  NMR (500 MHz,  $\text{CDCl}_3$ )  $\delta$  7.43 (d,  $J$  = 6.8 Hz, 2H), 7.33–7.20 (m, 5H), 7.12 (bs, 1H), 6.86 (bs, 1H), 4.69 (d,  $J$  = 9.5 Hz, 1H), 4.57–4.48 (m, 4H), 4.02–3.94 (m, 1H), 3.92–3.84 (m, 1H), 3.21 (s, 3H), 2.64 (s, 3H), 0.92 (t,  $J$  = 7.1 Hz, 3H);  $^{13}\text{C}$  NMR (125 MHz,  $\text{CDCl}_3$ )  $\delta$  168.3, 165.1, 164.2, 159.7, 149.9, 135.4, 134.4, 134.3, 129.8 (4C), 128.6 (5C), 100.4, 79.1, 60.1, 59.6, 50.6, 29.3, 28.5, 19.7, 14.1; HRMS (ESI-TOF) calcd for  $\text{C}_{26}\text{H}_{26}\text{BrClN}_3\text{O}_5$   $[\text{M} + \text{H}]^+$  574.0744, found 574.0751.

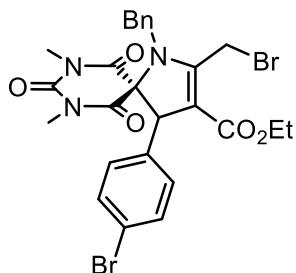

**Ethyl 1-benzyl-2-(bromomethyl)-4-(4-bromophenyl)-7,9-dimethyl-6,8,10-trioxo-1,7,9-triazaspiro[4.5]dec-2-ene-3-carboxylate (4ea).** White solid, 76% yield (94.3 mg), mp 73–75 °C;  $^1\text{H}$  NMR (500 MHz,  $\text{CDCl}_3$ )  $\delta$  7.47–7.34 (m, 4H), 7.33–7.25 (m, 3H), 7.03 (bs, 1H), 6.81 (bs, 1H), 4.69 (d,  $J$  = 10.1 Hz, 1H), 4.57–4.48 (m, 4H), 4.02–3.94 (m, 1H), 3.92–3.85 (m, 1H), 3.21 (s, 3H), 2.64 (s, 3H), 0.92 (t,  $J$  = 7.1 Hz, 3H);  $^{13}\text{C}$  NMR (125 MHz,  $\text{CDCl}_3$ )  $\delta$  168.3, 165.0, 164.1, 159.7, 149.9, 135.9, 134.4, 131.5 (2C), 130.2 (2C), 129.8 (2C), 128.7, 128.6 (2C), 122.5, 100.3, 79.0, 60.2, 59.6, 50.6, 29.3, 28.5, 19.7, 14.1; HRMS (ESI-TOF) calcd for  $\text{C}_{26}\text{H}_{26}\text{Br}_2\text{N}_3\text{O}_5$   $[\text{M} + \text{H}]^+$  620.0219, found 620.0215.

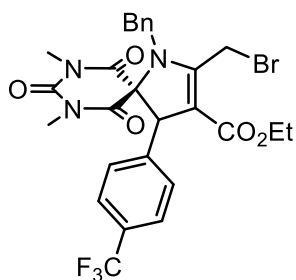

**Ethyl 1-benzyl-2-(bromomethyl)-7,9-dimethyl-6,8,10-trioxo-4-(4-(trifluoromethyl)phenyl)-1,7,9-triazaspiro[4.5]dec-2-ene-3-carboxylate (4fa).** White solid, 61% yield (74.1 mg), mp 66–68 °C;  $^1\text{H}$  NMR (500 MHz,  $\text{CDCl}_3$ )  $\delta$  7.54 (bs, 2H), 7.42 (d,  $J$  = 6.5 Hz, 2H), 7.34–7.24 (m, 4H), 7.07 (bs, 1H), 4.70 (s, 1H), 4.63 (s, 1H), 4.60–4.48 (m, 3H), 4.02–3.94 (m, 1H), 3.92–3.84 (m, 1H), 3.22 (s, 3H), 2.57

(s, 3H), 0.89 (t,  $J = 7.1$  Hz, 3H);  $^{13}\text{C}$  NMR (125 MHz,  $\text{CDCl}_3$ )  $\delta$  168.2, 164.9, 164.1, 160.0, 149.8, 141.0, 134.2, 130.6 (q,  $J = 26.0$  Hz), 130.0 (2C), 129.1 (2C), 128.8, 128.7 (2C), 125.3 (2C), 123.9 (q,  $J = 218.0$  Hz), 100.1, 78.9, 60.3, 59.6, 50.6, 29.4, 28.4, 19.7, 14.0; HRMS (ESI-TOF) calcd for  $\text{C}_{27}\text{H}_{26}\text{BrF}_3\text{N}_3\text{O}_5$   $[\text{M} + \text{H}]^+$  608.1008, found 608.1018.

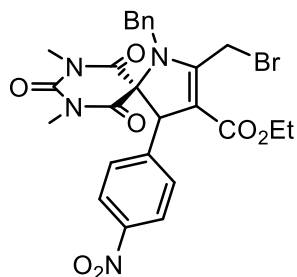

**Ethyl 1-benzyl-2-(bromomethyl)-7,9-dimethyl-4-(4-nitrophenyl)-6,8,10-trioxo-1,7,9-triazaspiro[4.5]dec-2-ene-3-carboxylate (4ga).** White solid, 58% yield (67.6 mg), mp 86–88 °C;  $^1\text{H}$  NMR (500 MHz,  $\text{CDCl}_3$ )  $\delta$  8.14 (bs, 2H), 7.50–7.28 (m, 6H), 7.14 (bs, 1H), 4.73 (d,  $J = 10.1$  Hz, 1H), 4.65 (s, 1H), 4.60–4.50 (m, 3H), 4.01–3.94 (m, 1H), 3.93–3.85 (m, 1H), 3.22 (s, 3H), 2.62 (s, 3H), 0.92 (t,  $J = 7.1$  Hz, 3H);  $^{13}\text{C}$  NMR (125 MHz,  $\text{CDCl}_3$ )  $\delta$  167.9, 164.7, 163.9, 160.2, 149.6, 147.7, 144.4, 133.9, 130.1 (2C), 129.6 (2C), 128.9, 128.7 (2C), 123.5 (2C), 99.9, 78.4, 59.8, 59.7, 50.5, 29.4, 28.5, 19.5, 14.1; HRMS (ESI-TOF) calcd for  $\text{C}_{26}\text{H}_{26}\text{BrN}_4\text{O}_7$   $[\text{M} + \text{H}]^+$  585.0985, found 585.0991.

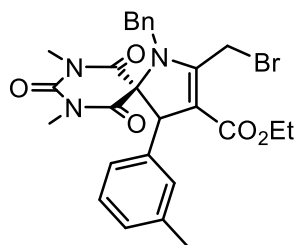

**Ethyl 1-benzyl-2-(bromomethyl)-7,9-dimethyl-6,8,10-trioxo-4-(m-tolyl)-1,7,9-triazaspiro[4.5]dec-2-ene-3-carboxylate (4ha).** White solid, 77% yield (85.7 mg), mp 61–64 °C;  $^1\text{H}$  NMR (500 MHz,  $\text{CDCl}_3$ )  $\delta$  7.46 (d,  $J = 7.0$  Hz, 2H), 7.33–7.25 (m, 3H), 7.15 (bs, 1H), 7.05 (d,  $J = 7.3$  Hz, 1H), 6.94 (bs, 1H), 6.70 (bs, 1H), 4.65 (d,  $J = 9.8$  Hz, 1H), 4.58 (d,  $J = 14.6$  Hz, 1H), 4.57 (s, 1H), 4.52 (d,  $J = 9.8$  Hz, 1H), 4.47 (d,  $J = 14.6$  Hz, 1H), 4.04–3.96 (m, 1H), 3.91–3.83 (m, 1H), 3.22 (s, 3H), 2.57 (s, 3H), 2.29 (s, 3H), 0.89 (t,  $J = 6.9$  Hz, 3H);  $^{13}\text{C}$  NMR (125 MHz,  $\text{CDCl}_3$ )  $\delta$  168.6, 165.2, 164.4, 159.4, 150.1, 138.0, 136.5, 134.9, 129.7 (2C), 129.1 (2C), 128.6 (2C), 128.5, 128.1, 125.6,

100.8, 79.9, 61.1, 59.4, 50.7, 29.2, 28.4, 21.4, 19.9, 14.0; HRMS (ESI-TOF) calcd for  $C_{27}H_{29}BrN_3O_5$   $[M + H]^+$  554.1291, found 554.1293.

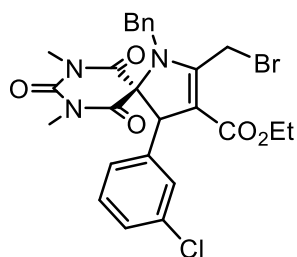

**Ethyl 1-benzyl-2-(bromomethyl)-4-(3-chlorophenyl)-7,9-dimethyl-6,8,10-trioxo-1,7,9-triazaspiro[4.5]dec-2-ene-3-carboxylate (4ia).** White solid, 79% yield (90.8 mg), mp 64–66 °C;  $^1H$  NMR (500 MHz,  $CDCl_3$ )  $\delta$  7.43 (d,  $J$  = 6.8 Hz, 2H), 7.34–7.04 (m, 6H), 6.98–6.70 (m, 1H), 4.72 (bs, 1H), 4.60–4.44 (m, 4H), 4.06–3.96 (m, 1H), 3.92–3.84 (m, 1H), 3.21 (s, 3H), 2.65 (s, 3H), 0.92 (t,  $J$  = 7.1 Hz, 3H);  $^{13}C$  NMR (125 MHz,  $CDCl_3$ )  $\delta$  168.2, 164.9, 164.1, 159.9, 149.8, 138.8, 134.4 (2C), 129.8 (2C), 129.4, 128.6 (5C), 126.7, 100.1, 79.2, 60.2, 59.6, 50.6, 29.3, 28.5, 19.7, 14.1; HRMS (ESI-TOF) calcd for  $C_{26}H_{26}BrClN_3O_5$   $[M + H]^+$  574.0744, found 574.0739.

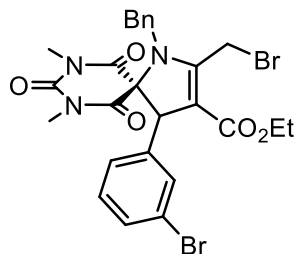

**Ethyl 1-benzyl-2-(bromomethyl)-4-(3-bromophenyl)-7,9-dimethyl-6,8,10-trioxo-1,7,9-triazaspiro[4.5]dec-2-ene-3-carboxylate (4ja).** White solid, 76% yield (93.6 mg), mp 65–67 °C;  $^1H$  NMR (500 MHz,  $CDCl_3$ )  $\delta$  7.43 (d,  $J$  = 7.0 Hz, 2H), 7.40 (d,  $J$  = 7.8 Hz, 1H), 7.34–7.24 (m, 4H), 7.20–6.78 (m, 2H), 4.72 (bs, 1H), 4.62–4.42 (m, 4H), 4.06–3.96 (m, 1H), 3.91–3.83 (m, 1H), 3.21 (s, 3H), 2.65 (s, 3H), 0.92 (t,  $J$  = 7.1 Hz, 3H);  $^{13}C$  NMR (125 MHz,  $CDCl_3$ )  $\delta$  168.1, 164.9, 164.1, 159.9, 149.8, 139.1, 134.4, 131.4 (2C), 129.8 (3C), 128.6 (3C), 127.1, 123.0, 100.0, 79.1, 60.2, 59.5, 50.5, 29.3, 28.5, 19.6, 14.0; HRMS (ESI-TOF) calcd for  $C_{26}H_{26}Br_2N_3O_5$   $[M + H]^+$  620.0219, found 620.0223.

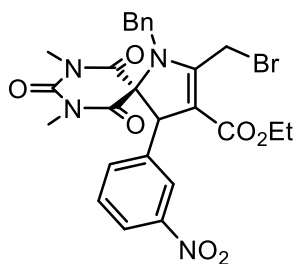

**Ethyl 1-benzyl-2-(bromomethyl)-7,9-dimethyl-4-(3-nitrophenyl)-6,8,10-trioxo-1,7,9-triazaspiro[4.5]dec-2-ene-3-carboxylate (4ka).** White solid, 61% yield (71.1 mg), mp 140–142 °C;  $^1\text{H}$  NMR (500 MHz,  $\text{CDCl}_3$ )  $\delta$  8.14 (dd,  $J = 9.2, 2.2$  Hz, 1H), 7.93 (bs, 1H), 7.48 (bs, 1H), 7.42 (d,  $J = 7.0$  Hz, 2H), 7.35–7.25 (m, 4H), 5.00–4.25 (m, 5H), 4.03–3.95 (m, 1H), 3.93–3.85 (m, 1H), 3.23 (s, 3H), 2.62 (s, 3H), 0.93 (t,  $J = 6.2$  Hz, 3H);  $^{13}\text{C}$  NMR (125 MHz,  $\text{CDCl}_3$ )  $\delta$  167.8, 164.8, 163.8, 160.3, 149.6, 148.2, 139.2, 134.5 (2C), 134.0, 129.9 (2C), 129.3, 128.8, 128.7 (2C), 123.4 (2C), 99.9, 78.5, 59.7, 50.4, 29.4, 28.5, 19.5, 14.1; HRMS (ESI-TOF) calcd for  $\text{C}_{26}\text{H}_{26}\text{BrN}_4\text{O}_7$   $[\text{M} + \text{H}]^+$  585.0985, found 585.0988.

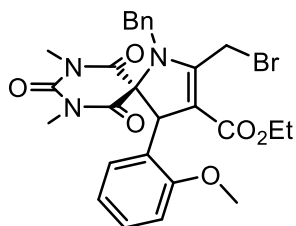

**Ethyl 1-benzyl-2-(bromomethyl)-4-(2-methoxyphenyl)-7,9-dimethyl-6,8,10-trioxo-1,7,9-triazaspiro[4.5]dec-2-ene-3-carboxylate (4la).** White solid, 67% yield (76.6 mg), mp 64–66 °C;  $^1\text{H}$  NMR (500 MHz,  $\text{CDCl}_3$ )  $\delta$  7.39 (d,  $J = 6.7$  Hz, 2H), 7.31–7.23 (m, 3H), 7.19 (td,  $J = 7.8, 1.4$  Hz, 1H), 7.09 (d,  $J = 7.6$  Hz, 1H), 6.90 (t,  $J = 7.5$  Hz, 1H), 6.75 (d,  $J = 8.3$  Hz, 1H), 5.16 (s, 1H), 4.78 (d,  $J = 9.7$  Hz, 1H), 4.56 (d,  $J = 14.3$  Hz, 1H), 4.53 (d,  $J = 9.7$  Hz, 1H), 4.48 (d,  $J = 14.3$  Hz, 1H), 4.05–3.98 (m, 1H), 3.90–3.83 (m, 1H), 3.65 (s, 3H), 3.16 (s, 3H), 2.57 (s, 3H), 0.90 (t,  $J = 7.1$  Hz, 3H);  $^{13}\text{C}$  NMR (125 MHz,  $\text{CDCl}_3$ )  $\delta$  168.7, 165.5, 164.5, 159.1, 156.4, 150.4, 134.4, 130.4, 130.0 (2C), 129.1, 128.49, 128.48 (2C), 125.3, 120.8, 109.4, 100.1, 77.9, 59.3, 55.7, 52.6, 50.4, 29.0, 28.1, 20.0, 14.0; HRMS (ESI-TOF) calcd for  $\text{C}_{27}\text{H}_{29}\text{BrN}_3\text{O}_6$   $[\text{M} + \text{H}]^+$  570.1240, found 570.1247.

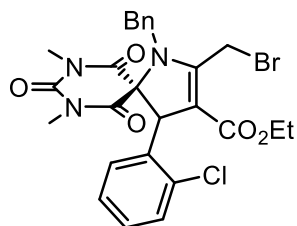

**Ethyl 1-benzyl-2-(bromomethyl)-4-(2-chlorophenyl)-7,9-dimethyl-6,8,10-trioxo-1,7,9-triazaspiro[4.5]dec-2-ene-3-carboxylate (4ma).** White solid, 75% yield (86.3 mg), mp 63–65 °C;  $^1\text{H}$  NMR (500 MHz,  $\text{CDCl}_3$ )  $\delta$  7.40 (d,  $J$  = 6.5 Hz, 2H), 7.32–7.26 (m, 4H), 7.24–7.21 (m, 2H), 7.20–7.16 (m, 1H), 5.23 (s, 1H), 4.74 (d,  $J$  = 9.6 Hz, 1H), 4.58 (d,  $J$  = 9.6 Hz, 1H), 4.56 (d,  $J$  = 14.3 Hz, 1H), 4.51 (d,  $J$  = 14.3 Hz, 1H), 3.99–3.91 (m, 1H), 3.88–3.81 (m, 1H), 3.16 (s, 3H), 2.64 (s, 3H), 0.86 (t,  $J$  = 7.1 Hz, 3H);  $^{13}\text{C}$  NMR (125 MHz,  $\text{CDCl}_3$ )  $\delta$  168.0, 165.2, 164.1, 159.6, 149.9, 134.8, 134.1, 133.5, 131.4, 130.1 (2C), 129.4, 128.8, 128.7, 128.6 (2C), 127.0, 100.6, 77.8, 59.4, 55.5, 50.4, 29.1, 28.3, 19.7, 13.9; HRMS (ESI-TOF) calcd for  $\text{C}_{26}\text{H}_{26}\text{BrClN}_3\text{O}_5$   $[\text{M} + \text{H}]^+$  574.0744, found 574.0748.

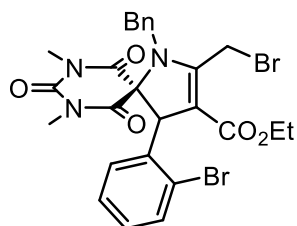

**Ethyl 1-benzyl-2-(bromomethyl)-4-(2-bromophenyl)-7,9-dimethyl-6,8,10-trioxo-1,7,9-triazaspiro[4.5]dec-2-ene-3-carboxylate (4na).** White solid, 80% yield (98.6 mg), mp 118–120 °C;  $^1\text{H}$  NMR (500 MHz,  $\text{CDCl}_3$ )  $\delta$  7.47 (d,  $J$  = 7.9 Hz, 1H), 7.41 (d,  $J$  = 6.8 Hz, 2H), 7.32–7.26 (m, 4H), 7.23 (dd,  $J$  = 7.7, 1.5 Hz, 1H), 7.10 (td,  $J$  = 7.6, 1.5 Hz, 1H), 5.22 (s, 1H), 4.75 (d,  $J$  = 9.9 Hz, 1H), 4.59–4.50 (m, 3H), 3.97–3.90 (m, 1H), 3.88–3.81 (m, 1H), 3.17 (s, 3H), 2.65 (s, 3H), 0.86 (t,  $J$  = 7.1 Hz, 3H);  $^{13}\text{C}$  NMR (125 MHz,  $\text{CDCl}_3$ )  $\delta$  167.9, 165.2, 164.1, 159.5, 150.0, 136.6, 134.2, 132.2, 131.7, 130.1 (2C), 129.7, 128.7, 128.6 (2C), 127.6, 124.3, 101.2, 77.8, 59.5, 58.2, 50.4, 29.1, 28.4, 19.7, 13.9; HRMS (ESI-TOF) calcd for  $\text{C}_{26}\text{H}_{26}\text{Br}_2\text{N}_3\text{O}_5$   $[\text{M} + \text{H}]^+$  620.0219, found 620.0225.

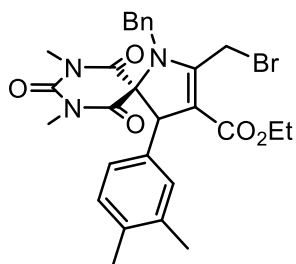

**Ethyl 1-benzyl-2-(bromomethyl)-4-(3,4-dimethylphenyl)-7,9-dimethyl-6,8,10-trioxo-1,7,9-triazaspiro[4.5]dec-2-ene-3-carboxylate (4oa).** White solid, 72% yield (81.7 mg), mp 152–154 °C;  $^1\text{H}$  NMR (500 MHz,  $\text{CDCl}_3$ )  $\delta$  7.47 (d,  $J$  = 7.1 Hz, 2H), 7.33–7.24 (m, 3H), 7.01 (bs, 1H), 6.86 (bs, 1H), 6.65 (bs, 1H), 4.67 (d,  $J$  = 7.9 Hz, 1H), 4.58–4.42 (m, 4H), 4.01–3.95 (m, 1H), 3.94–3.86 (m, 1H), 3.23 (s, 3H), 2.58 (s, 3H), 2.20 (s, 6H), 0.93 (t,  $J$  = 6.9 Hz, 3H);  $^{13}\text{C}$  NMR (125 MHz,  $\text{CDCl}_3$ )  $\delta$  168.6, 165.3, 164.5, 159.1, 150.1, 136.7, 135.1, 133.8, 129.5 (5C), 128.6 (2C), 128.4, 125.8, 101.0, 80.0, 60.8, 59.5, 50.7, 29.2, 28.4, 20.0, 19.8, 19.6, 14.1; HRMS (ESI-TOF) calcd for  $\text{C}_{28}\text{H}_{31}\text{BrN}_3\text{O}_5$   $[\text{M} + \text{H}]^+$  568.1447, found 568.1452.

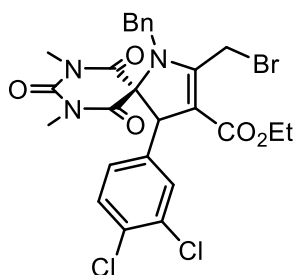

**Ethyl 1-benzyl-2-(bromomethyl)-4-(3,4-dichlorophenyl)-7,9-dimethyl-6,8,10-trioxo-1,7,9-triazaspiro[4.5]dec-2-ene-3-carboxylate (4pa).** White solid, 73% yield (89.1 mg), mp 130–132°C;  $^1\text{H}$  NMR (500 MHz,  $\text{CDCl}_3$ )  $\delta$  7.41 (d,  $J$  = 6.4 Hz, 2H), 7.39–7.27 (m, 4H), 7.24–6.66 (m, 2H), 4.75 (bs, 1H), 4.56–4.44 (m, 4H), 4.05–3.97 (m, 1H), 3.95–3.88 (m, 1H), 3.21 (s, 3H), 2.70 (s, 3H), 0.97 (t,  $J$  = 7.1 Hz, 3H);  $^{13}\text{C}$  NMR (125 MHz,  $\text{CDCl}_3$ )  $\delta$  168.0, 164.9, 164.0, 160.0, 149.8, 137.1, 134.2, 132.5, 130.6 (3C), 129.9 (2C), 128.8, 128.7 (2C), 127.9, 100.0, 78.7, 59.7, 59.5, 50.5, 29.4, 28.6, 19.6, 14.2; HRMS (ESI-TOF) calcd for  $\text{C}_{26}\text{H}_{25}\text{BrCl}_2\text{N}_3\text{O}_5$   $[\text{M} + \text{H}]^+$  608.0355, found 608.0351.

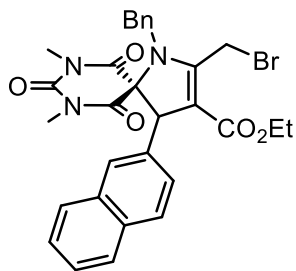

**Ethyl 1-benzyl-2-(bromomethyl)-7,9-dimethyl-4-(naphthalen-2-yl)-6,8,10-trioxo-1,7,9-triazaspiro[4.5]dec-2-ene-3-carboxylate (4qa).** White solid, 68% yield (79.9 mg), mp 85–87 °C;  $^1\text{H}$  NMR (500 MHz,  $\text{CDCl}_3$ )  $\delta$  7.86–7.68 (m, 3H), 7.64–7.36 (s, 5H), 7.34–7.26 (m, 3H), 7.23–6.86 (m, 1H), 4.82–4.71 (m, 2H), 4.65–4.46 (m, 3H), 3.96–3.81 (m, 2H), 3.26 (s, 3H), 2.37 (s, 3H), 0.81 (t,  $J = 7.0$  Hz, 3H);  $^{13}\text{C}$  NMR (125 MHz,  $\text{CDCl}_3$ )  $\delta$  168.4, 165.2, 164.4, 159.6, 150.0, 134.8, 133.1, 133.0, 129.8 (2C), 128.63 (2C), 128.56, 128.1 (2C), 127.7 (2C), 126.5, 126.4, 126.3, 125.9, 100.8, 79.7, 61.1, 59.5, 50.7, 29.3, 28.4, 19.9, 14.0; HRMS (ESI-TOF) calcd for  $\text{C}_{30}\text{H}_{29}\text{BrN}_3\text{O}_5$  [ $\text{M} + \text{H}$ ] $^+$  590.1291, found 590.1282.

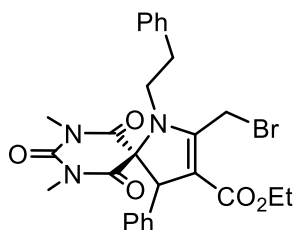

**Ethyl 2-(bromomethyl)-7,9-dimethyl-6,8,10-trioxo-1-phenethyl-4-phenyl-1,7,9-triazaspiro[4.5]dec-2-ene-3-carboxylate (4ab).** White solid, 71% yield (78.9 mg), mp 60–62 °C;  $^1\text{H}$  NMR (500 MHz,  $\text{CDCl}_3$ )  $\delta$  7.31–7.24 (m, 5H), 7.23–7.18 (s, 3H), 7.11 (bs, 1H), 6.94 (bs, 1H), 4.57 (d,  $J = 10.3$  Hz, 1H), 4.50 (s, 1H), 4.48 (d,  $J = 10.3$  Hz, 1H), 4.00–3.92 (m, 1H), 3.88–3.81 (m, 1H), 3.64–3.51 (m, 2H), 3.37 (s, 3H), 3.05–2.93 (m, 2H), 2.58 (s, 3H), 0.86 (t,  $J = 7.1$  Hz, 3H);  $^{13}\text{C}$  NMR (125 MHz,  $\text{CDCl}_3$ )  $\delta$  168.4, 165.2, 164.3, 159.9, 150.2, 138.5, 136.9, 129.0 (2C), 128.7 (2C), 128.5, 128.4 (4C), 126.9, 99.4, 80.8, 61.3, 59.3, 48.0, 36.0, 29.6, 28.6, 19.3, 14.0; HRMS (ESI-TOF) calcd for  $\text{C}_{27}\text{H}_{29}\text{BrN}_3\text{O}_5$  [ $\text{M} + \text{H}$ ] $^+$  554.1291, found 554.1298.

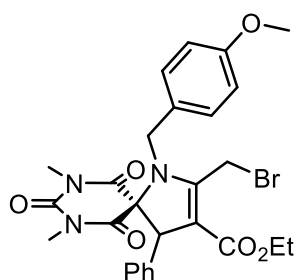

**Ethyl 2-(bromomethyl)-1-(4-methoxybenzyl)-7,9-dimethyl-6,8,10-trioxo-4-phenyl-1,7,9-triazaspiro[4.5]dec-2-ene-3-carboxylate (4ac).** White solid, 75% yield (85.8 mg), mp 63–65 °C;  $^1\text{H}$  NMR (500 MHz,  $\text{CDCl}_3$ )  $\delta$  7.32 (d,  $J = 8.3\text{ Hz}$ , 2H), 7.28–7.04 (m, 4H), 6.87 (bs, 1H), 6.81 (d,  $J = 8.3\text{ Hz}$ , 2H), 4.70 (d,  $J = 9.0\text{ Hz}$ , 1H), 4.63–4.57 (m, 2H), 4.55 (d,  $J = 14.0\text{ Hz}$ , 1H), 4.43 (d,  $J = 14.0\text{ Hz}$ , 1H), 4.01–3.93 (m, 1H), 3.89–3.81 (m, 1H), 3.77 (s, 3H), 3.21 (s, 3H), 2.55 (s, 3H), 0.86 (t,  $J = 7.0\text{ Hz}$ , 3H);  $^{13}\text{C}$  NMR (125 MHz,  $\text{CDCl}_3$ )  $\delta$  168.7, 165.2, 164.4, 159.8, 159.5, 150.0, 136.8, 131.5 (2C), 128.6 (4C), 128.4, 126.1, 113.8 (2C), 100.4, 79.2, 61.0, 59.4, 55.4, 49.9, 29.2, 28.3, 20.0, 14.0; HRMS (ESI-TOF) calcd for  $\text{C}_{27}\text{H}_{29}\text{BrN}_3\text{O}_6$   $[\text{M} + \text{H}]^+$  570.1240, found 570.1243.

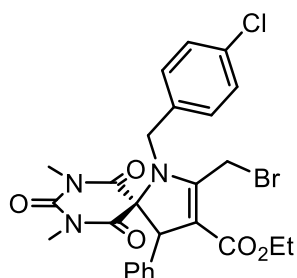

**Ethyl 2-(bromomethyl)-1-(4-chlorobenzyl)-7,9-dimethyl-6,8,10-trioxo-4-phenyl-1,7,9-triazaspiro[4.5]dec-2-ene-3-carboxylate (4ad).** White solid, 70% yield (80.9 mg), mp 172–174 °C;  $^1\text{H}$  NMR (500 MHz,  $\text{CDCl}_3$ )  $\delta$  7.49 (d,  $J = 8.3\text{ Hz}$ , 2H), 7.31 (d,  $J = 8.4\text{ Hz}$ , 2H), 7.30–7.24 (m, 3H), 7.12 (bs, 1H), 6.96 (bs, 1H), 4.62–4.54 (m, 2H), 4.52–4.41 (m, 3H), 4.01–3.93 (m, 1H), 3.89–3.81 (m, 1H), 3.30 (s, 3H), 2.59 (s, 3H), 0.87 (t,  $J = 7.1\text{ Hz}$ , 3H);  $^{13}\text{C}$  NMR (125 MHz,  $\text{CDCl}_3$ )  $\delta$  168.3, 165.3, 164.2, 159.2, 150.0, 136.6, 134.3, 134.1, 130.4 (2C), 128.9 (2C), 128.5, 128.4 (4C), 101.3, 80.5, 60.9, 59.5, 50.3, 29.4, 28.5, 19.8, 14.0; HRMS (ESI-TOF) calcd for  $\text{C}_{26}\text{H}_{26}\text{BrClN}_3\text{O}_5$   $[\text{M} + \text{H}]^+$  574.0744, found 574.0752.

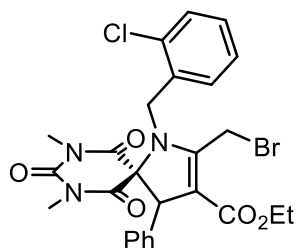

**Ethyl 2-(bromomethyl)-1-(2-chlorobenzyl)-7,9-dimethyl-6,8,10-trioxo-4-phenyl-1,7,9-triazaspiro[4.5]dec-2-ene-3-carboxylate (4ae).** White solid, 64% yield (73.8 mg), mp 158–159 °C;  $^1\text{H}$  NMR (500 MHz,  $\text{CDCl}_3$ )  $\delta$  7.61–7.56 (m, 1H), 7.36–7.33 (m, 1H), 7.30–6.85 (m, 7H), 4.74 (d,  $J = 10.3$  Hz, 1H), 4.66 (d,  $J = 16.3$  Hz, 1H), 4.64–4.57 (m, 3H), 4.03–3.95 (m, 1H), 3.90–3.83 (m, 1H), 3.22 (s, 3H), 2.57 (s, 3H), 0.88 (t,  $J = 7.1$  Hz, 3H);  $^{13}\text{C}$  NMR (125 MHz,  $\text{CDCl}_3$ )  $\delta$  167.9, 165.0, 164.2, 159.3, 150.1, 136.6, 134.3, 133.2, 130.5, 129.8, 129.6, 128.47 (2C), 128.45 (4C), 126.9, 100.7, 61.3, 59.5, 48.1, 29.3, 28.4, 19.4, 14.0; HRMS (ESI-TOF) calcd for  $\text{C}_{26}\text{H}_{26}\text{BrClN}_3\text{O}_5$   $[\text{M} + \text{H}]^+$  574.0744, found 574.0748.

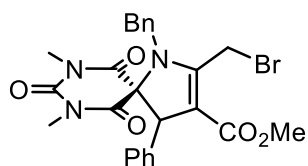

**Methyl 1-benzyl-2-(bromomethyl)-7,9-dimethyl-6,8,10-trioxo-4-phenyl-1,7,9-triazaspiro[4.5]dec-2-ene-3-carboxylate (4af).** White solid, 75% yield (78.8 mg), mp 77–79 °C;  $^1\text{H}$  NMR (500 MHz,  $\text{CDCl}_3$ )  $\delta$  7.45 (d,  $J = 6.9$  Hz, 2H), 7.35–7.22 (m, 6H), 7.14 (bs, 1H), 6.91 (bs, 1H), 4.68 (d,  $J = 9.7$  Hz, 1H), 4.60 (s, 1H), 4.56 (d,  $J = 14.6$  Hz, 1H), 4.52 (d,  $J = 9.7$  Hz, 1H), 4.50 (d,  $J = 14.6$  Hz, 1H), 3.45 (s, 3H), 3.22 (s, 3H), 2.56 (s, 3H);  $^{13}\text{C}$  NMR (125 MHz,  $\text{CDCl}_3$ )  $\delta$  168.4, 165.2, 164.9, 159.8, 150.0, 136.6, 134.7, 129.7 (2C), 128.63 (2C), 128.57, 128.52, 128.47 (4C), 100.3, 79.7, 60.9, 50.9, 50.7, 29.3, 28.4, 19.9; HRMS (ESI-TOF) calcd for  $\text{C}_{25}\text{H}_{25}\text{BrN}_3\text{O}_5$   $[\text{M} + \text{H}]^+$  526.0978, found 526.0975.

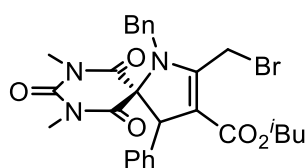

**Isobutyl 1-benzyl-2-(bromomethyl)-7,9-dimethyl-6,8,10-trioxo-4-phenyl-1,7,9-triazaspiro[4.5]dec-2-ene-3-carboxylate (4ag).** White solid, 76% yield (86.3 mg), mp 105–107 °C;  $^1\text{H}$  NMR (500 MHz,  $\text{CDCl}_3$ )  $\delta$  7.45 (d,  $J$  = 7.0 Hz, 2H), 7.35–7.12 (m, 7H), 6.90 (bs, 1H), 4.68 (d,  $J$  = 8.7 Hz, 1H), 4.63–4.53 (m, 3H), 4.48 (d,  $J$  = 14.5 Hz, 1H), 3.77 (dd,  $J$  = 10.7, 6.4 Hz, 1H), 3.56 (dd,  $J$  = 10.7, 6.0 Hz, 1H), 3.22 (s, 3H), 2.55 (s, 3H), 1.56–1.46 (m, 1H), 0.50 (dd,  $J$  = 6.8, 1.2 Hz, 6H);  $^{13}\text{C}$  NMR (125 MHz,  $\text{CDCl}_3$ )  $\delta$  168.6, 165.2, 164.5, 159.8, 150.0, 136.8, 134.7, 129.8 (2C), 128.6 (2C), 128.53 (5C), 128.48, 100.4, 79.6, 69.8, 61.1, 50.7, 29.3, 28.3, 27.6, 19.9, 18.8 (2C); HRMS (ESI-TOF) calcd for  $\text{C}_{28}\text{H}_{31}\text{BrN}_3\text{O}_5$   $[\text{M} + \text{H}]^+$  568.1447, found 568.1444.

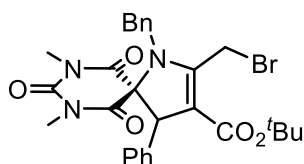

**tert-Butyl 1-benzyl-2-(bromomethyl)-7,9-dimethyl-6,8,10-trioxo-4-phenyl-1,7,9-triazaspiro[4.5]dec-2-ene-3-carboxylate (4ah).** White solid, 72% yield (81.5 mg), mp 104–106 °C;  $^1\text{H}$  NMR (500 MHz,  $\text{CDCl}_3$ )  $\delta$  7.46 (d,  $J$  = 7.1 Hz, 2H), 7.34–7.14 (m, 7H), 6.88 (bs, 1H), 4.64–4.52 (m, 4H), 4.46 (d,  $J$  = 14.5 Hz, 1H), 3.23 (s, 3H), 2.55 (s, 3H), 1.11 (s, 9H);  $^{13}\text{C}$  NMR (125 MHz,  $\text{CDCl}_3$ )  $\delta$  168.8, 165.3, 163.7, 158.6, 150.1, 137.1, 135.0, 129.7 (2C), 128.6 (5C), 128.5, 128.3 (2C), 102.2, 79.9, 79.6, 61.6, 50.8, 29.3, 28.3, 28.0 (3C), 20.1; HRMS (ESI-TOF) calcd for  $\text{C}_{28}\text{H}_{31}\text{BrN}_3\text{O}_5$   $[\text{M} + \text{H}]^+$  568.1447, found 568.1453.

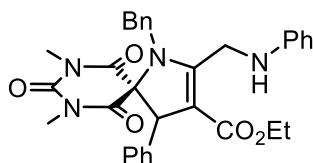

**Ethyl 1-benzyl-7,9-dimethyl-6,8,10-trioxo-4-phenyl-2-((phenylamino)methyl)-1,7,9-triazaspiro[4.5]dec-2-ene-3-carboxylate (6aa).** White solid, mp 107–109 °C;  $^1\text{H}$  NMR (500 MHz,  $\text{CDCl}_3$ )  $\delta$  7.38 (d,  $J$  = 6.3 Hz, 2H), 7.31–7.22 (m, 6H), 7.19 (t,  $J$  = 7.6 Hz, 2H), 7.11–6.94 (m, 2H), 6.76 (t,  $J$  = 7.0 Hz, 1H), 6.64 (d,  $J$  = 8.1 Hz, 2H), 4.62 (s, 1H), 4.53 (d,  $J$  = 14.7 Hz, 1H), 4.44 (d,  $J$  = 14.7 Hz, 1H), 4.41 (d,  $J$  = 12.4 Hz, 1H), 4.34 (d,  $J$  = 12.4 Hz, 1H), 4.16 (bs, 1H), 3.98–3.90 (m, 1H), 3.86–3.79 (m, 1H), 3.23

(s, 3H), 2.58 (s, 3H), 0.82 (t,  $J = 7.0$  Hz, 3H);  $^{13}\text{C}$  NMR (125 MHz,  $\text{CDCl}_3$ )  $\delta$  168.7, 165.4, 164.9, 162.4, 150.1, 147.9, 136.8, 135.4, 129.6 (2C), 129.3 (2C), 128.6 (2C), 128.5 (2C), 128.4 (2C), 128.3 (2C), 118.4, 113.9 (2C), 100.7, 80.5, 61.3, 59.3, 51.0, 39.5, 29.3, 28.4, 14.0; HRMS (ESI-TOF) calcd for  $\text{C}_{28}\text{H}_{31}\text{BrN}_3\text{O}_5$   $[\text{M} + \text{H}]^+$  553.2451, found 553.2454.

#### 4. Single-crystal X-ray crystallography of 3ma and 4oa

Single crystal of **3ma** were obtained by slow evaporation from a mixture of acetone/*n*-hexane at 5 °C. Single-crystal X-ray diffraction data were collected on a diffractometer (Bruker D8 Venture) equipped with a CCD area detector using graphite-monochromated MoK $\alpha$  radiation ( $\lambda = 0.71073$  Å) in the scan range  $5.086 < 2\theta < 49.996^\circ$ . Crystallographic data have been deposited in the Cambridge Crystallographic Data Centre as deposition number CCDC 2305863.

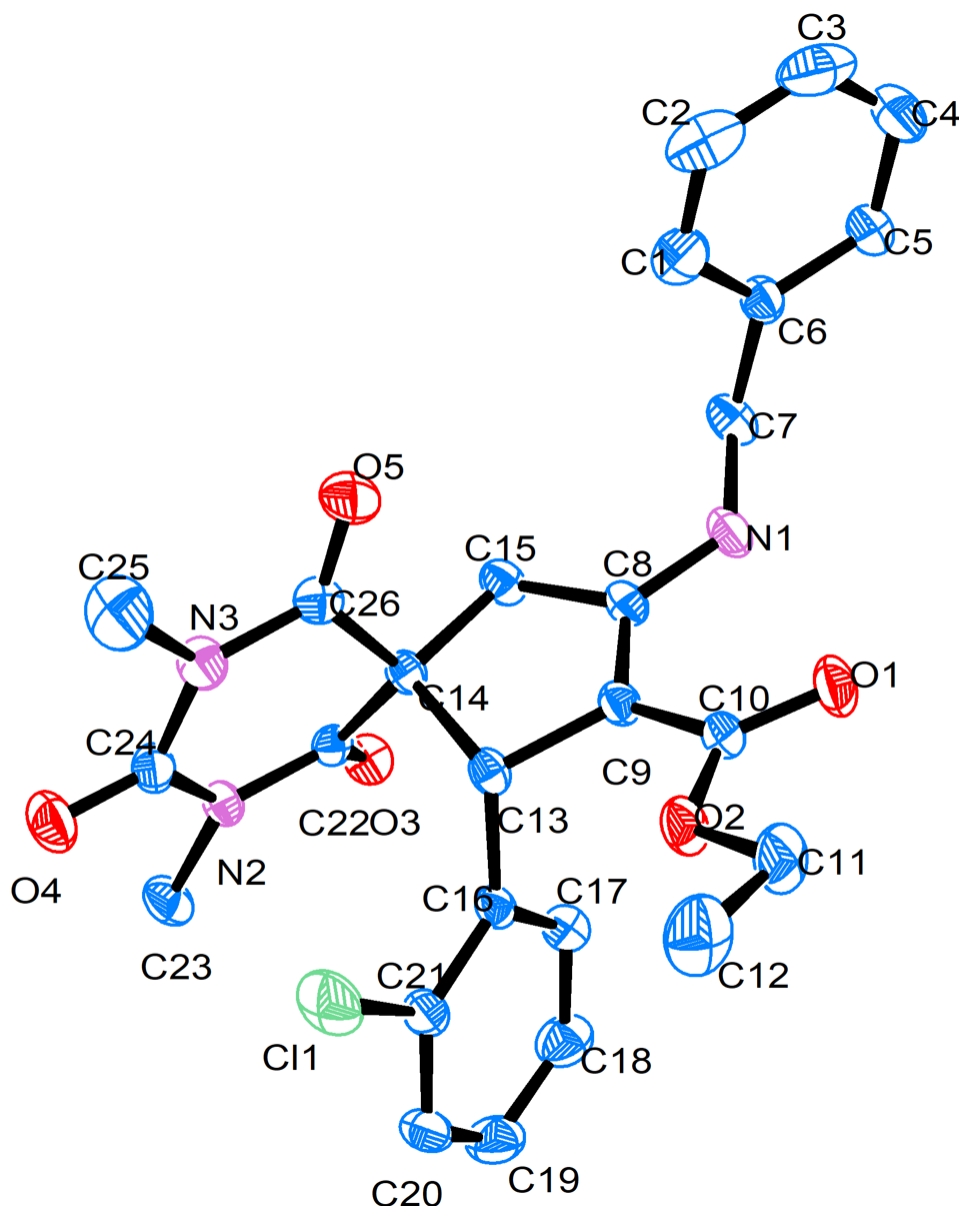

**Figure S1. ORTEP Diagrams of 3ma with 30% thermal ellipsoids**

**Table S1. Crystal data and structure refinement for 3ma**

|                                              |                                                                 |
|----------------------------------------------|-----------------------------------------------------------------|
| Identification code                          | CCDC 2305863                                                    |
| Empirical formula                            | C <sub>26</sub> H <sub>26</sub> ClN <sub>3</sub> O <sub>5</sub> |
| Formula weight                               | 495.95                                                          |
| Temperature/K                                | 296.15                                                          |
| Crystal system                               | triclinic                                                       |
| Space group                                  | P-1                                                             |
| a/Å                                          | 8.2719(11)                                                      |
| b/Å                                          | 10.9748(14)                                                     |
| c/Å                                          | 14.3779(18)                                                     |
| $\alpha$ /°                                  | 91.073(2)                                                       |
| $\beta$ /°                                   | 98.225(2)                                                       |
| $\gamma$ /°                                  | 110.945(2)                                                      |
| Volume/Å <sup>3</sup>                        | 1203.0(3)                                                       |
| Z                                            | 2                                                               |
| $\rho_{\text{calc}}/\text{cm}^3$             | 1.369                                                           |
| $\mu/\text{mm}^{-1}$                         | 0.202                                                           |
| F(000)                                       | 520.0                                                           |
| Crystal size/mm <sup>3</sup>                 | 0.26 × 0.24 × 0.21                                              |
| Radiation                                    | MoK $\alpha$ ( $\lambda$ = 0.71073)                             |
| 2 $\theta$ range for data collection/°       | 5.086 to 49.996                                                 |
| Index ranges                                 | -7 ≤ h ≤ 9, -13 ≤ k ≤ 12, -17 ≤ l ≤ 14                          |
| Reflections collected                        | 6128                                                            |
| Independent reflections                      | 4196 [ $R_{\text{int}}$ = 0.0147, $R_{\text{sigma}}$ = 0.0323]  |
| Data/restraints/parameters                   | 4196/1/319                                                      |
| Goodness-of-fit on F <sup>2</sup>            | 1.057                                                           |
| Final R indexes [ $I \geq 2\sigma(I)$ ]      | $R_1$ = 0.0474, $wR_2$ = 0.1220                                 |
| Final R indexes [all data]                   | $R_1$ = 0.0686, $wR_2$ = 0.1297                                 |
| Largest diff. peak/hole [e Å <sup>-3</sup> ] | 0.53/-0.41                                                      |

Single crystal of **4oa** were obtained by slow evaporation from a mixture of acetone/*n*-hexane at 5 °C. Single-crystal X-ray diffraction data were collected on a diffractometer (Bruker D8 Venture) equipped with a CCD area detector using graphite-monochromated MoK $\alpha$  radiation ( $\lambda = 0.71073$  Å) in the scan range  $4.48 < 2\theta < 50.00^\circ$ . Crystallographic data have been deposited in the Cambridge Crystallographic Data Centre as deposition number CCDC 2305868.

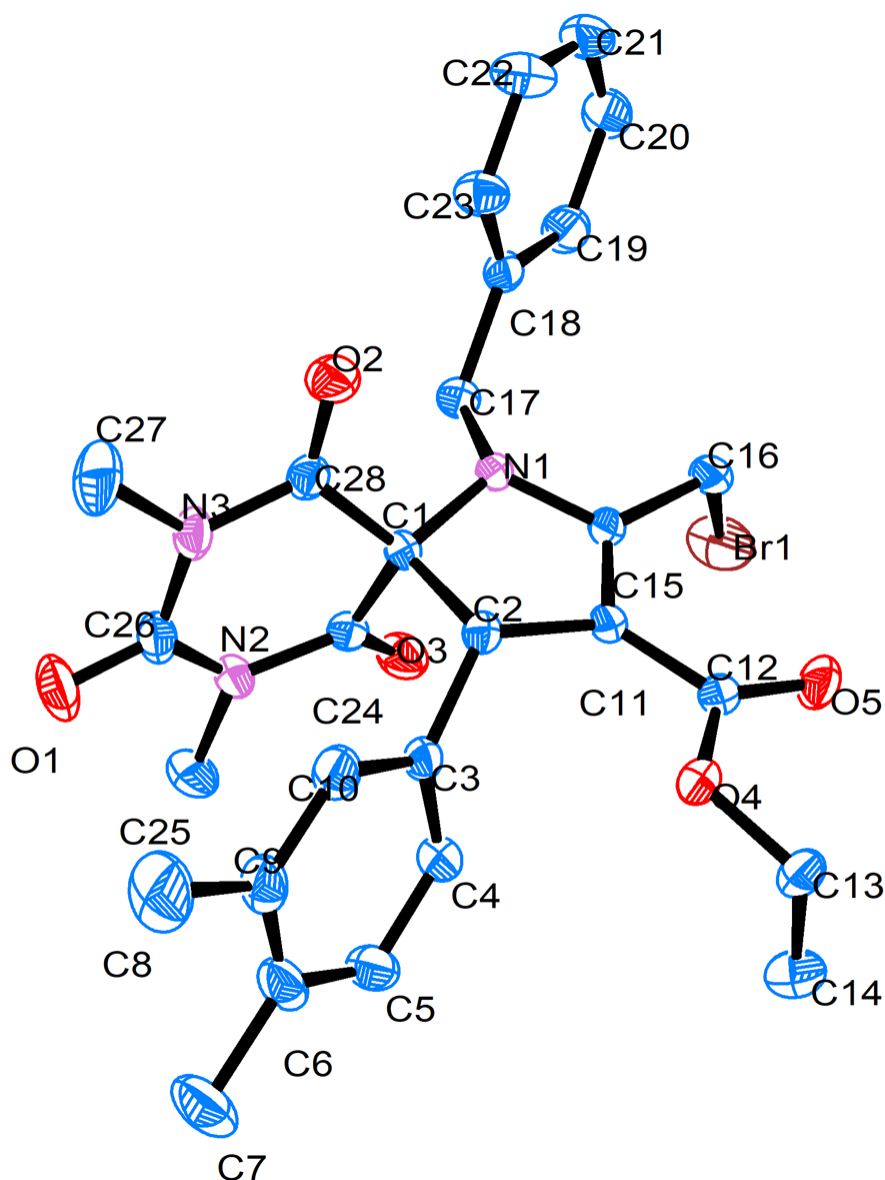

**Figure S2. ORTEP Diagrams of 4oa with 30% thermal ellipsoids**

**Table S2. Crystal data and structure refinement for 4oa**

|                                                |                                                                       |
|------------------------------------------------|-----------------------------------------------------------------------|
| Identification code                            | CCDC 2305868                                                          |
| Empirical formula                              | C <sub>28.01</sub> H <sub>30.01</sub> BrN <sub>3</sub> O <sub>5</sub> |
| Formula weight                                 | 568.65                                                                |
| Temperature/K                                  | 298.0                                                                 |
| Crystal system                                 | triclinic                                                             |
| Space group (number)                           | P-1 (2)                                                               |
| a/Å                                            | 11.0881(8)                                                            |
| b/Å                                            | 11.9277(9)                                                            |
| c/Å                                            | 12.1514(9)                                                            |
| $\alpha/^\circ$                                | 115.124(2)                                                            |
| $\beta/^\circ$                                 | 105.133(3)                                                            |
| $\gamma/^\circ$                                | 100.196(3)                                                            |
| Volume/Å <sup>3</sup>                          | 1326.22(17)                                                           |
| Z                                              | 2                                                                     |
| $\rho_{\text{calc}}/\text{cm}^3$               | 1.424                                                                 |
| $\mu/\text{mm}^{-1}$                           | 1.593                                                                 |
| F(000)                                         | 588                                                                   |
| Crystal size/mm <sup>3</sup>                   | 0.26×0.25×0.22                                                        |
| Crystal colour                                 | colourless                                                            |
| Crystal shape                                  | block                                                                 |
| Radiation                                      | MoK $\alpha$ ( $\lambda$ =0.71073 Å)                                  |
| 2 $\theta$ range for data collection/ $^\circ$ | 4.48 to 50.00 (0.84 Å)                                                |
| Index ranges                                   | -13 ≤ h ≤ 13, -14 ≤ k ≤ 14, -14 ≤ l ≤ 14                              |
| Reflections collected                          | 37795                                                                 |
| Independent reflections                        | 4666 [R <sub>int</sub> = 0.1052, R <sub>sigma</sub> = 0.0570]         |
| Data/Restraints/Parameters                     | 4666/0/347                                                            |
| Goodness-of-fit on F <sup>2</sup>              | 1.051                                                                 |
| Final R indexes [I>=2 $\sigma$ (I)]            | R <sub>1</sub> = 0.0415, wR <sub>2</sub> = 0.1067                     |
| Final R indexes [all data]                     | R <sub>1</sub> = 0.0609, wR <sub>2</sub> = 0.1144                     |
| Largest peak/hole [eÅ <sup>-3</sup> ]          | 0.29/-0.45                                                            |

## 5. References

- [1] R. Gu, K. Flidrova and J.-M. Lehn, *J. Am. Chem. Soc.*, 2018, **140**, 5560–5568.
- [2] J.-Y. Liu, G.-E. Cao, W. Xu, J. Cao and W.-L. Wang, *Appl. Organometal. Chem.*, 2010, **24**, 685–691.

## 6. Copies of NMR spectra for 3, 4 and 6aa

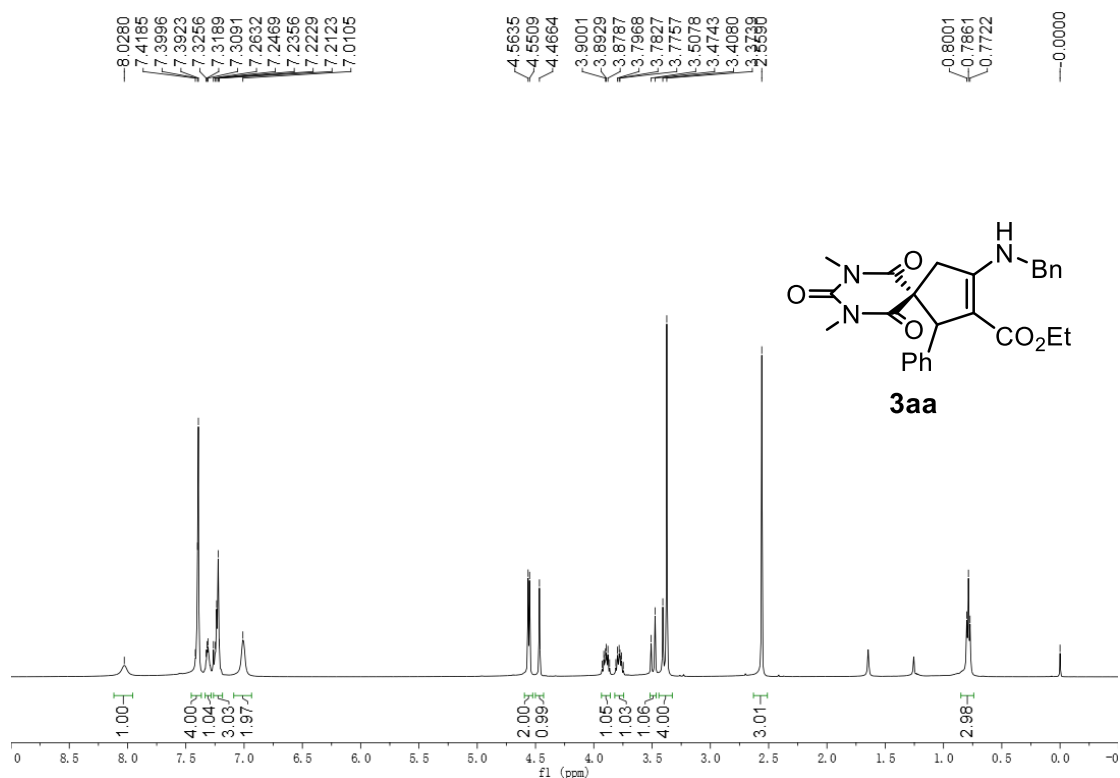

Figure S3. <sup>1</sup>H NMR (500 MHz, CDCl<sub>3</sub>) of compound 3aa

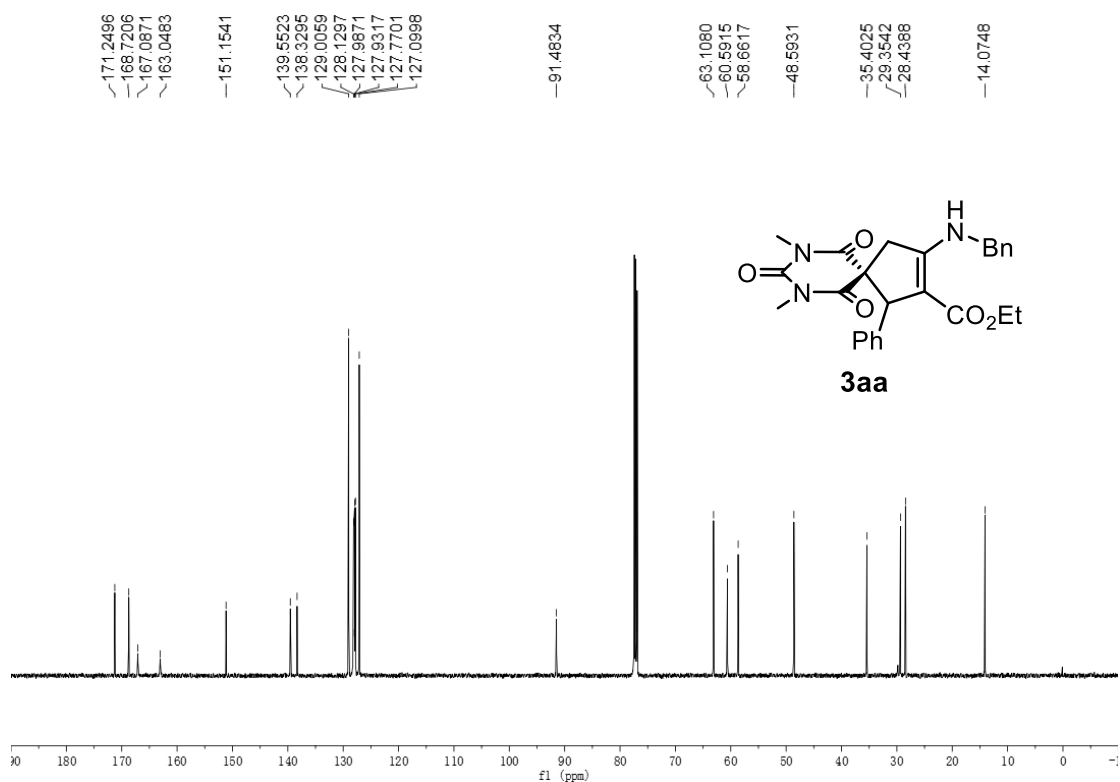

Figure S4. <sup>13</sup>C NMR (125 MHz, CDCl<sub>3</sub>) of compound 3aa

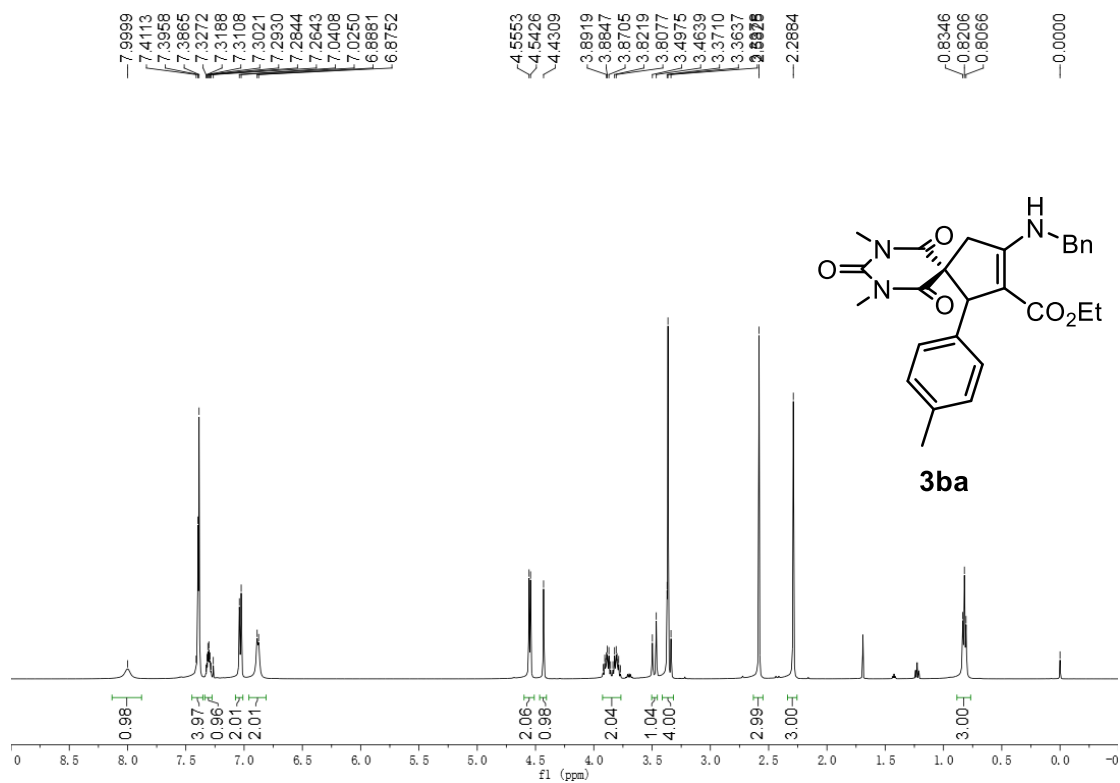

Figure S5. <sup>1</sup>H NMR (500 MHz, CDCl<sub>3</sub>) of compound 3ba

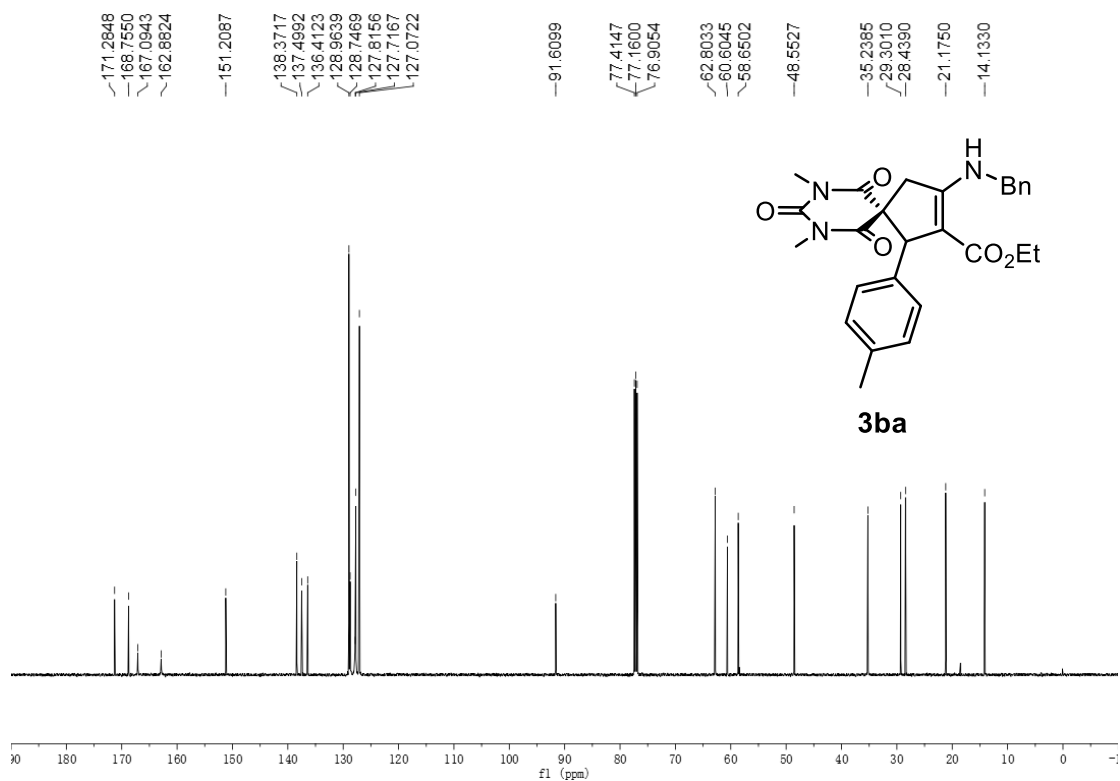

Figure S6. <sup>13</sup>C NMR (125 MHz, CDCl<sub>3</sub>) of compound 3ba

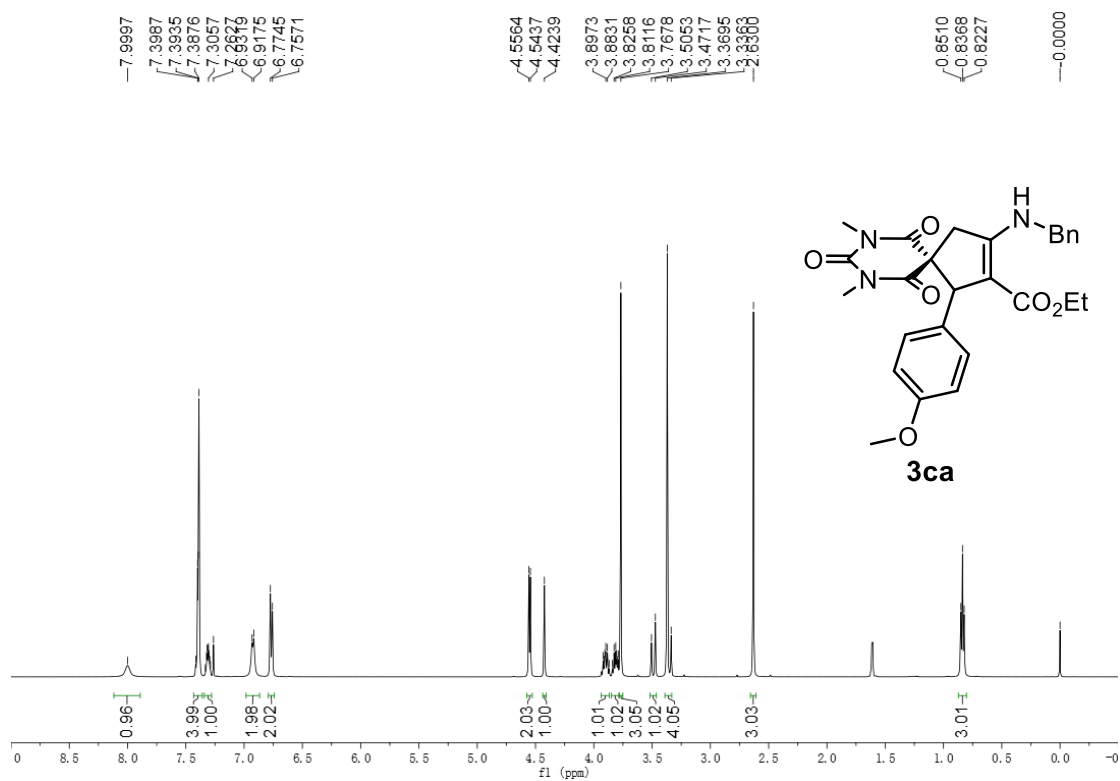

Figure S7. <sup>1</sup>H NMR (500 MHz, CDCl<sub>3</sub>) of compound 3ca

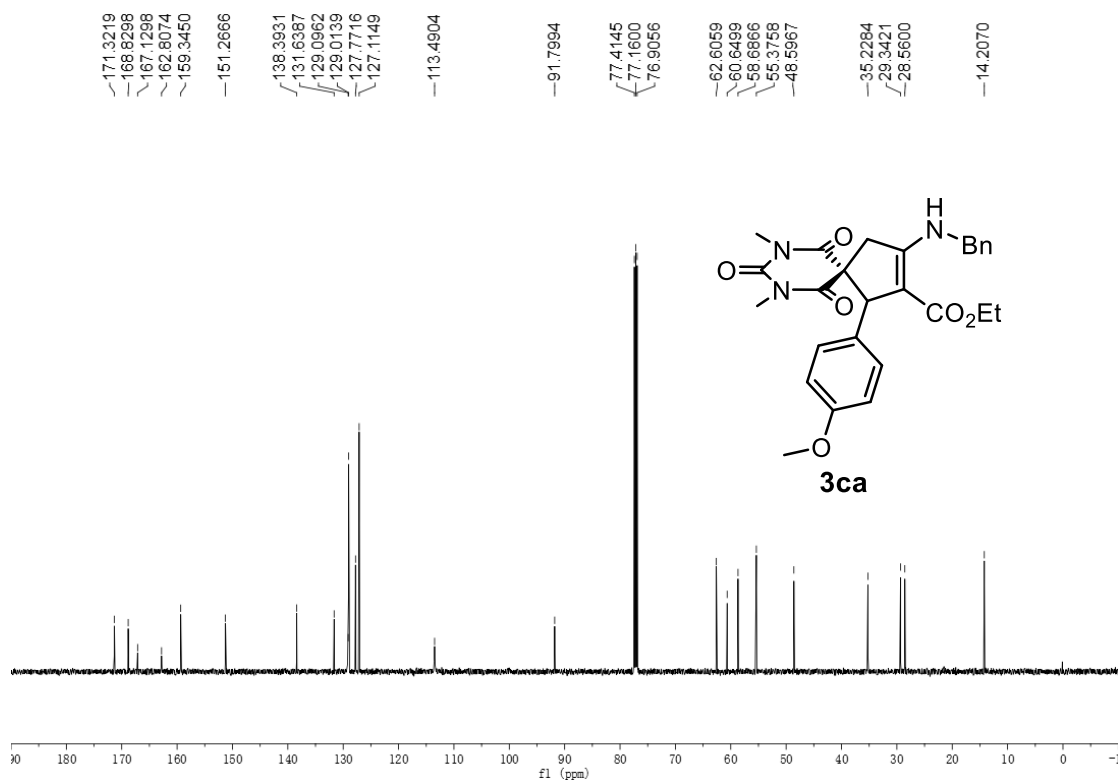

Figure S8. <sup>13</sup>C NMR (125 MHz, CDCl<sub>3</sub>) of compound 3ca

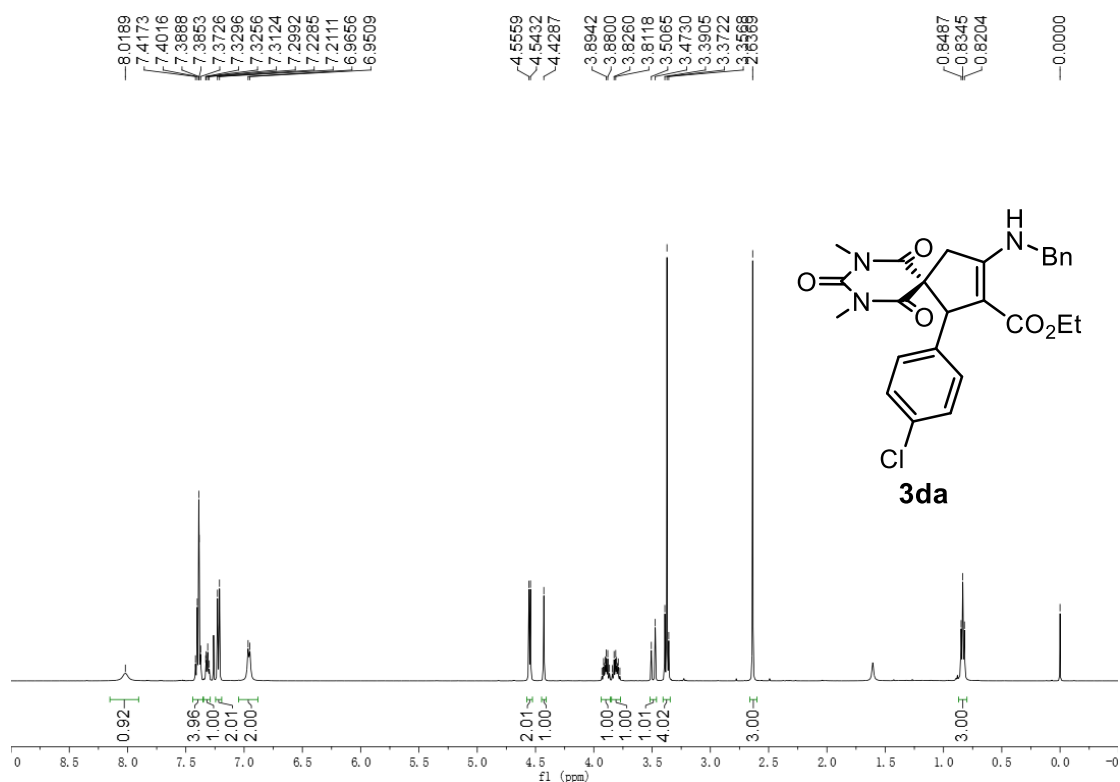

Figure S9. <sup>1</sup>H NMR (500 MHz, CDCl<sub>3</sub>) of compound 3da

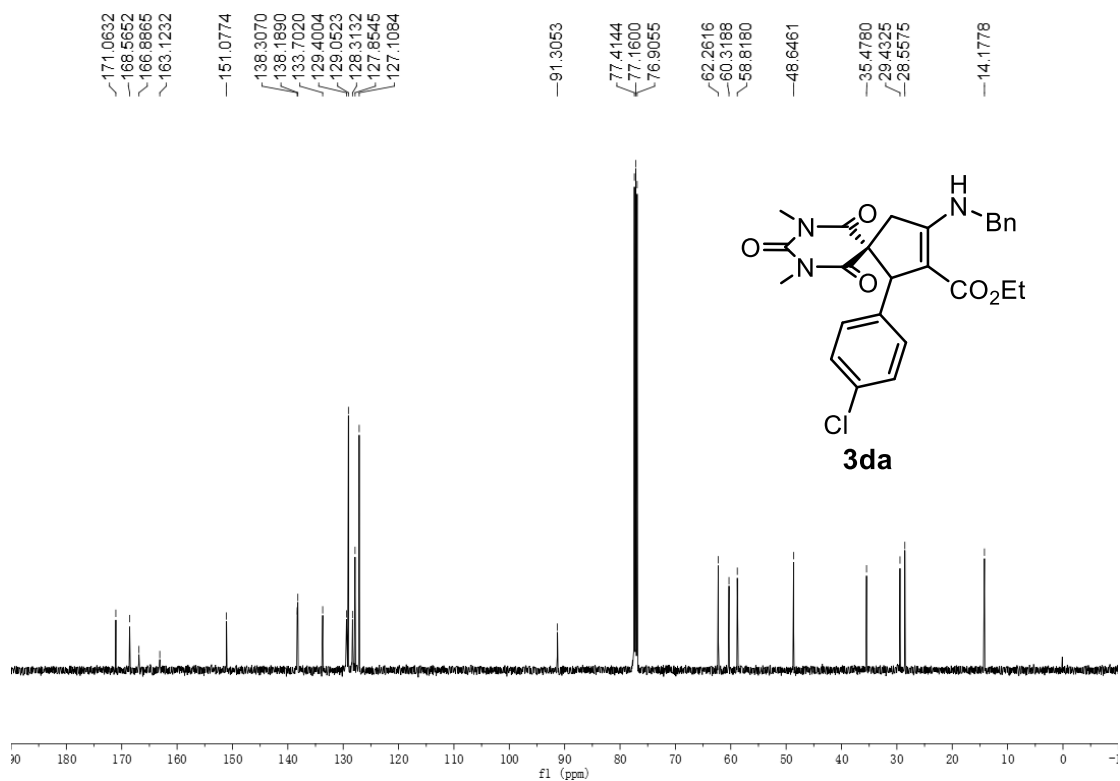

Figure S10. <sup>13</sup>C NMR (125 MHz, CDCl<sub>3</sub>) of compound 3da

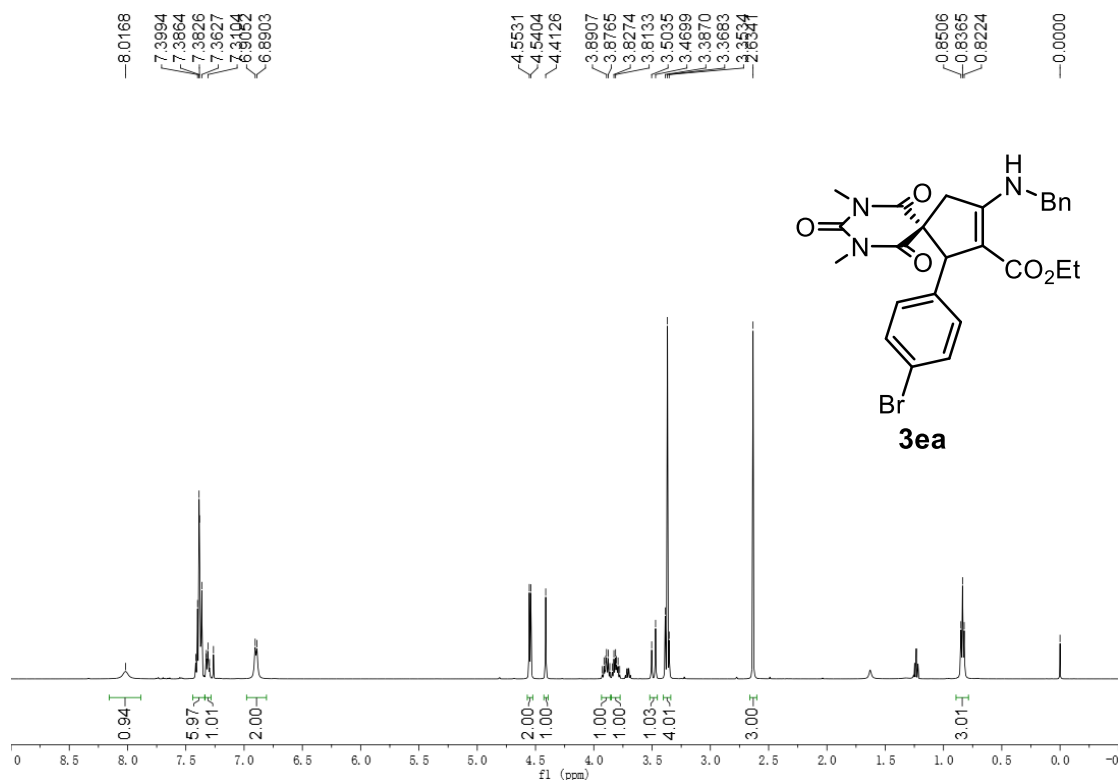

Figure S11. <sup>1</sup>H NMR (500 MHz, CDCl<sub>3</sub>) of compound **3ea**

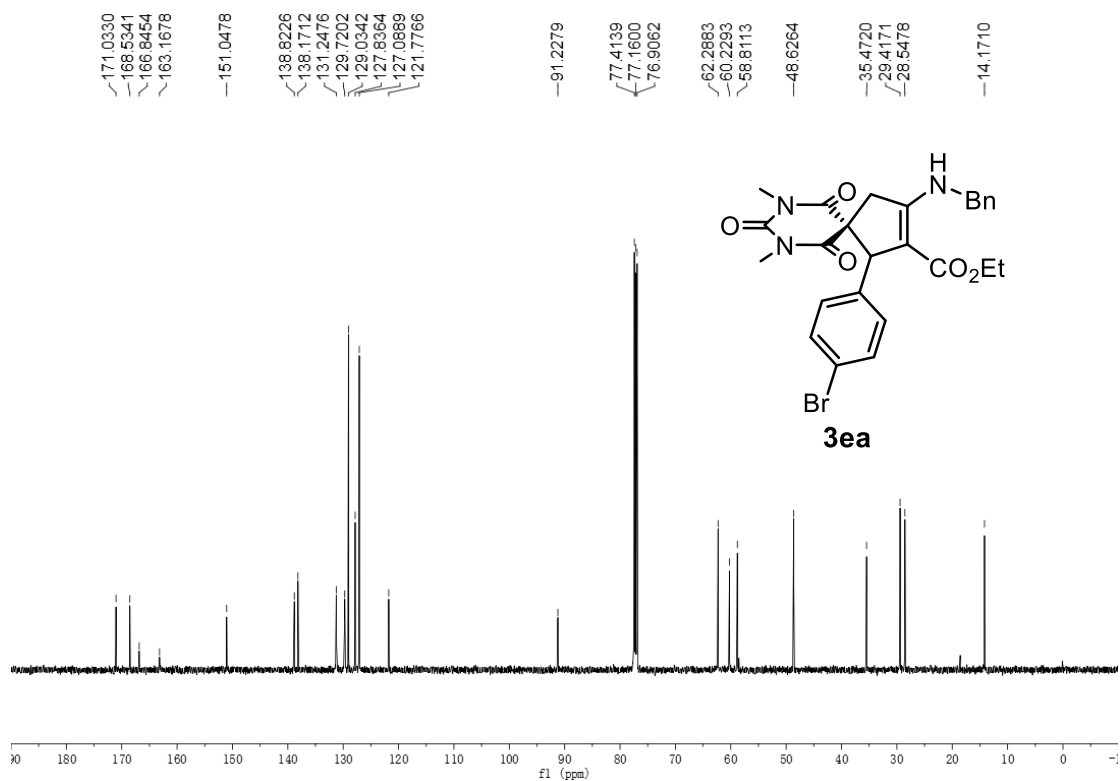

Figure S12. <sup>13</sup>C NMR (125 MHz, CDCl<sub>3</sub>) of compound **3ea**

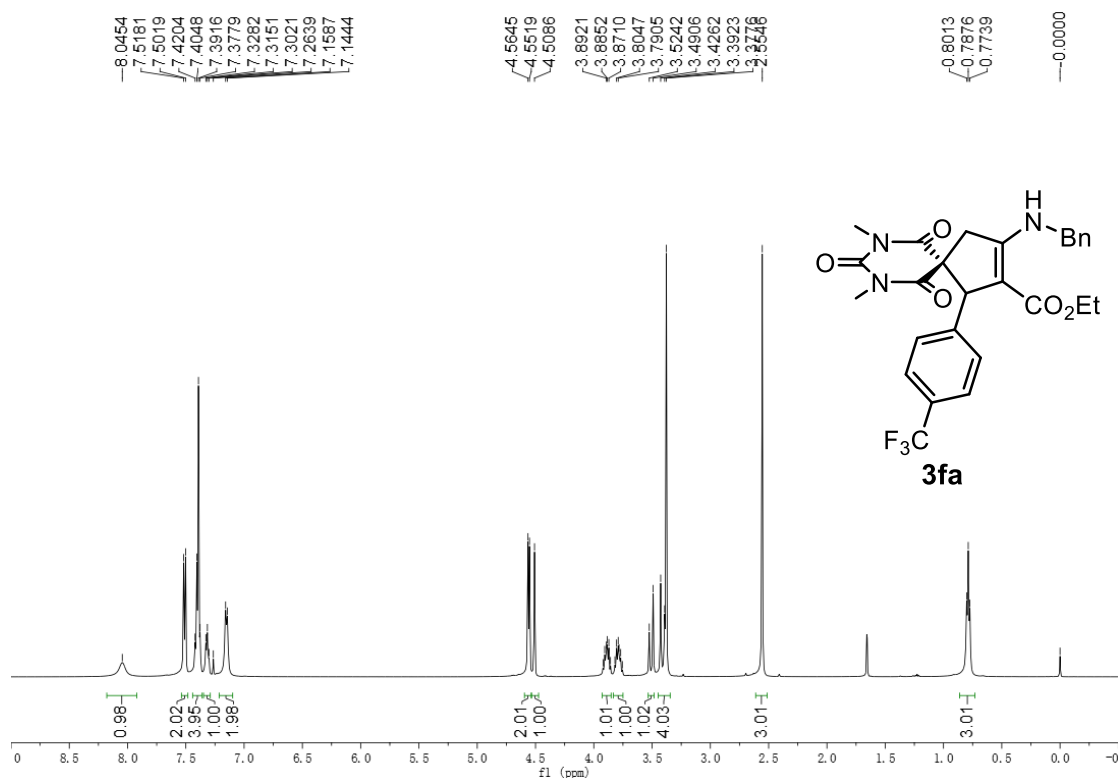

Figure S13. <sup>1</sup>H NMR (500 MHz, CDCl<sub>3</sub>) of compound 3fa

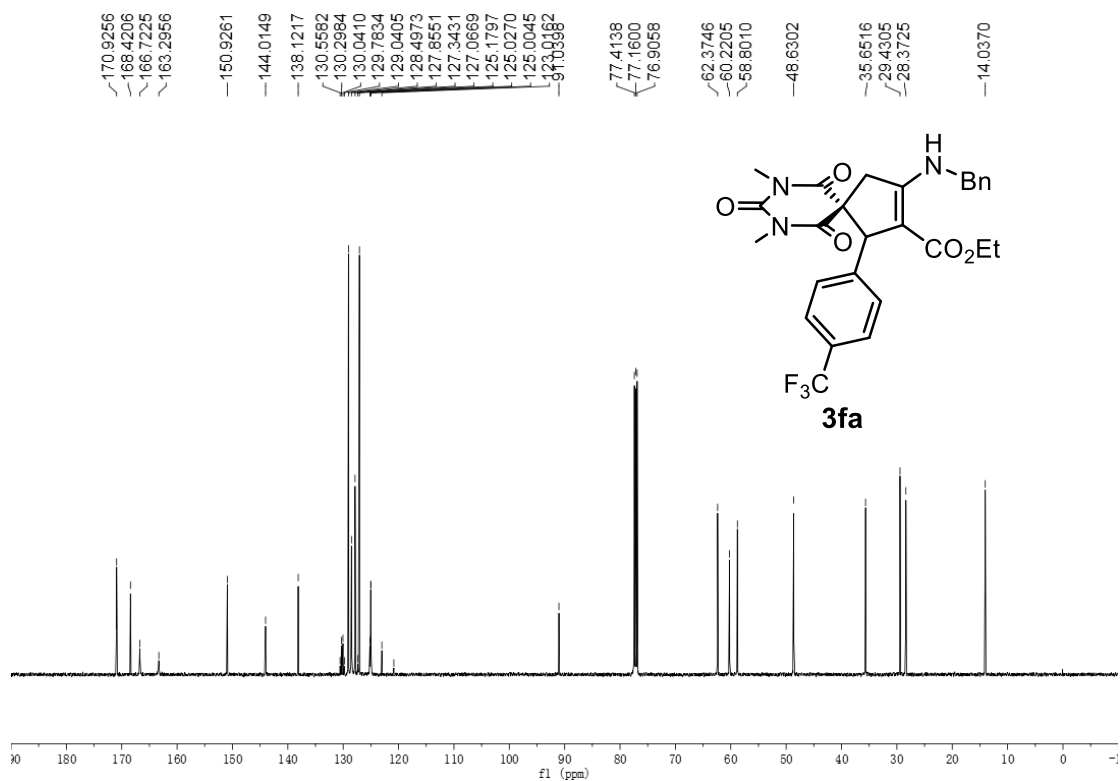

Figure S14. <sup>13</sup>C NMR (125 MHz, CDCl<sub>3</sub>) of compound 3fa

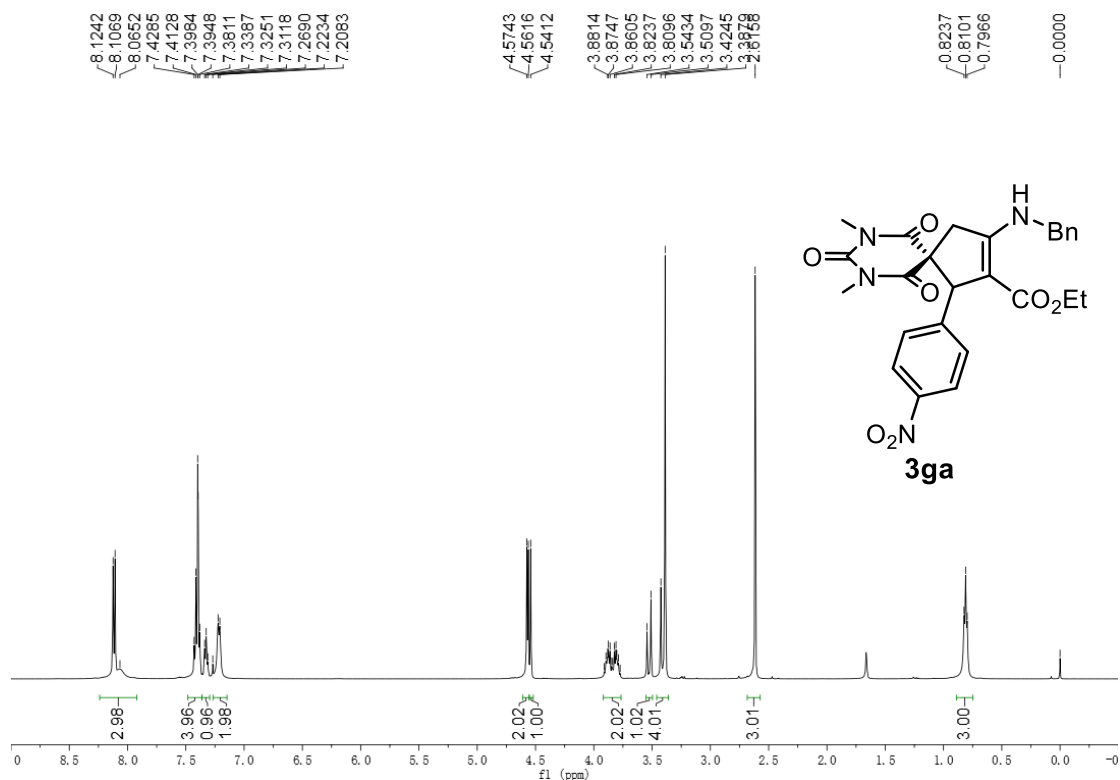

Figure S15. <sup>1</sup>H NMR (500 MHz, CDCl<sub>3</sub>) of compound 3ga

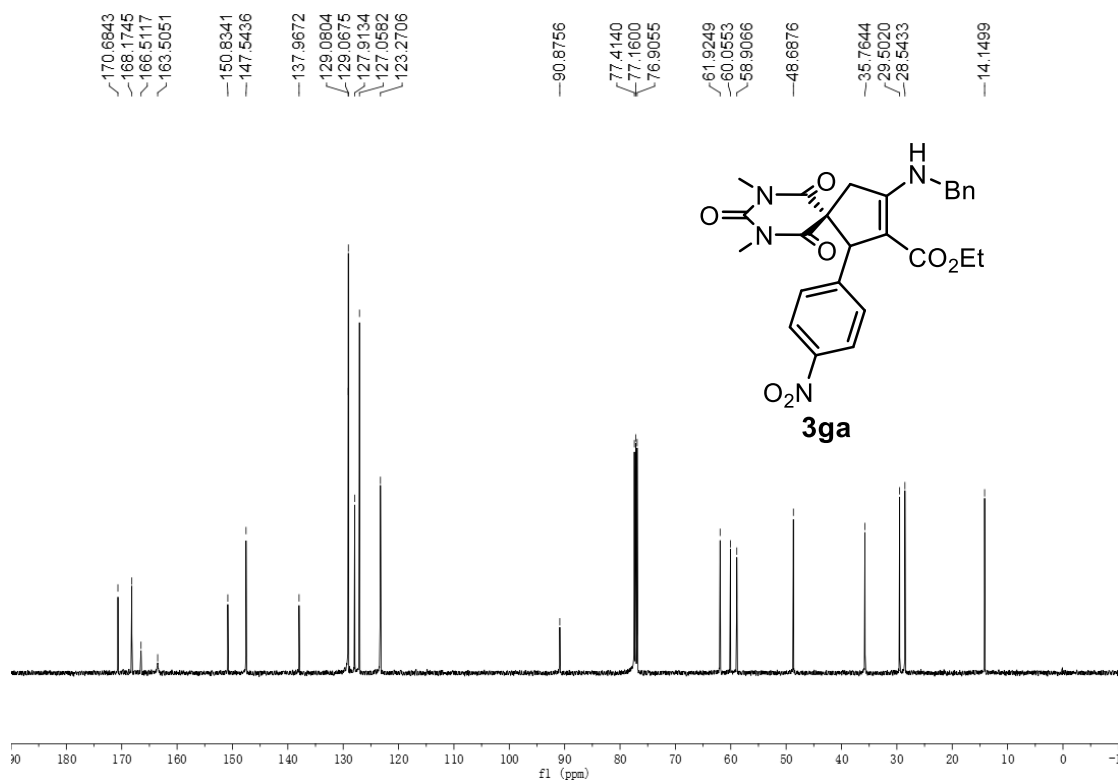

Figure S16. <sup>13</sup>C NMR (125 MHz, CDCl<sub>3</sub>) of compound 3ga

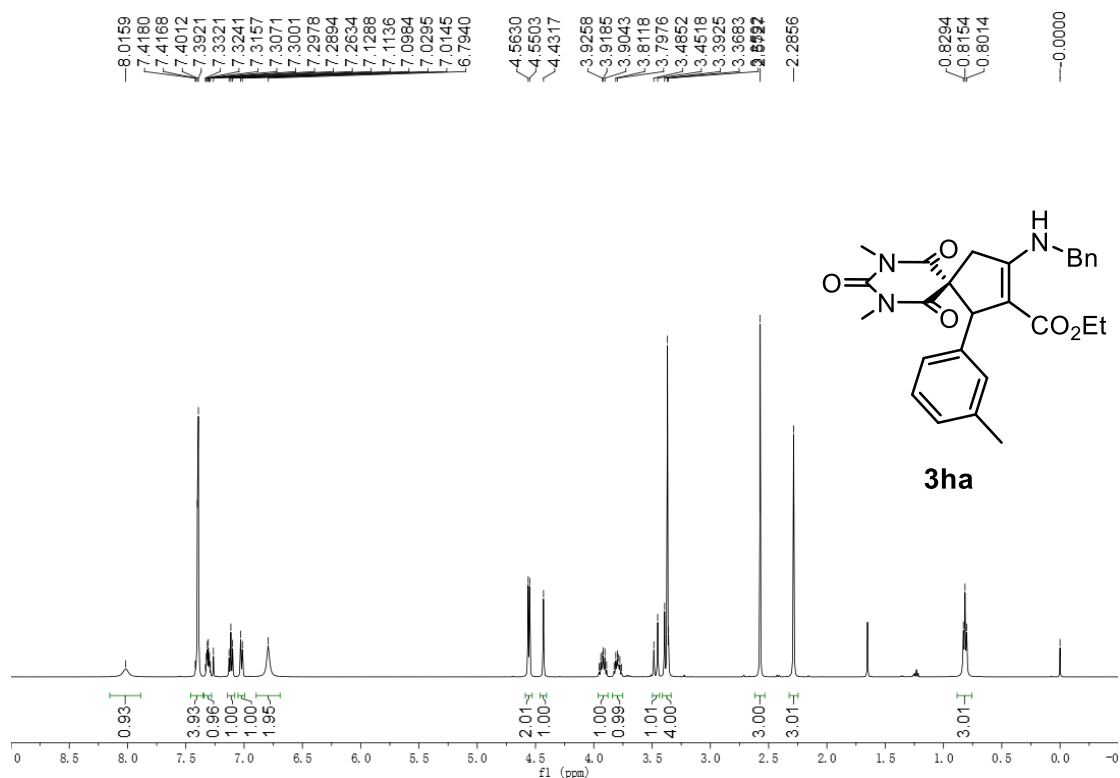

Figure S17. <sup>1</sup>H NMR (500 MHz, CDCl<sub>3</sub>) of compound 3ha

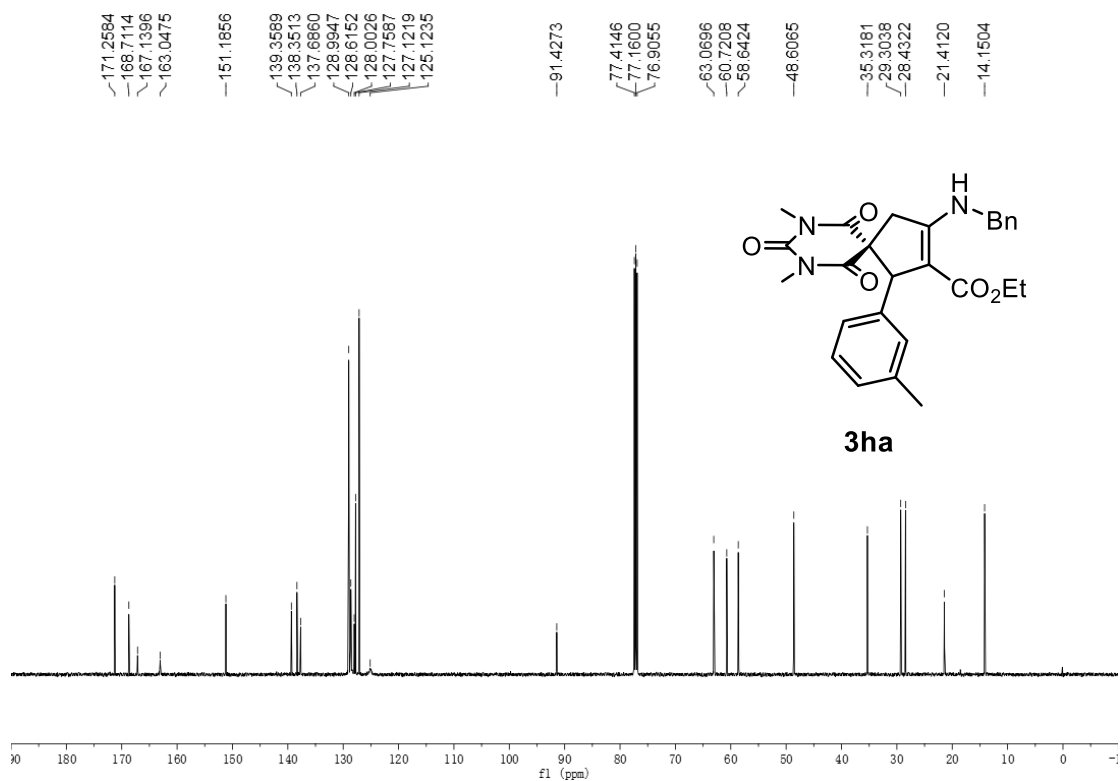

Figure S18. <sup>13</sup>C NMR (125 MHz, CDCl<sub>3</sub>) of compound 3ha

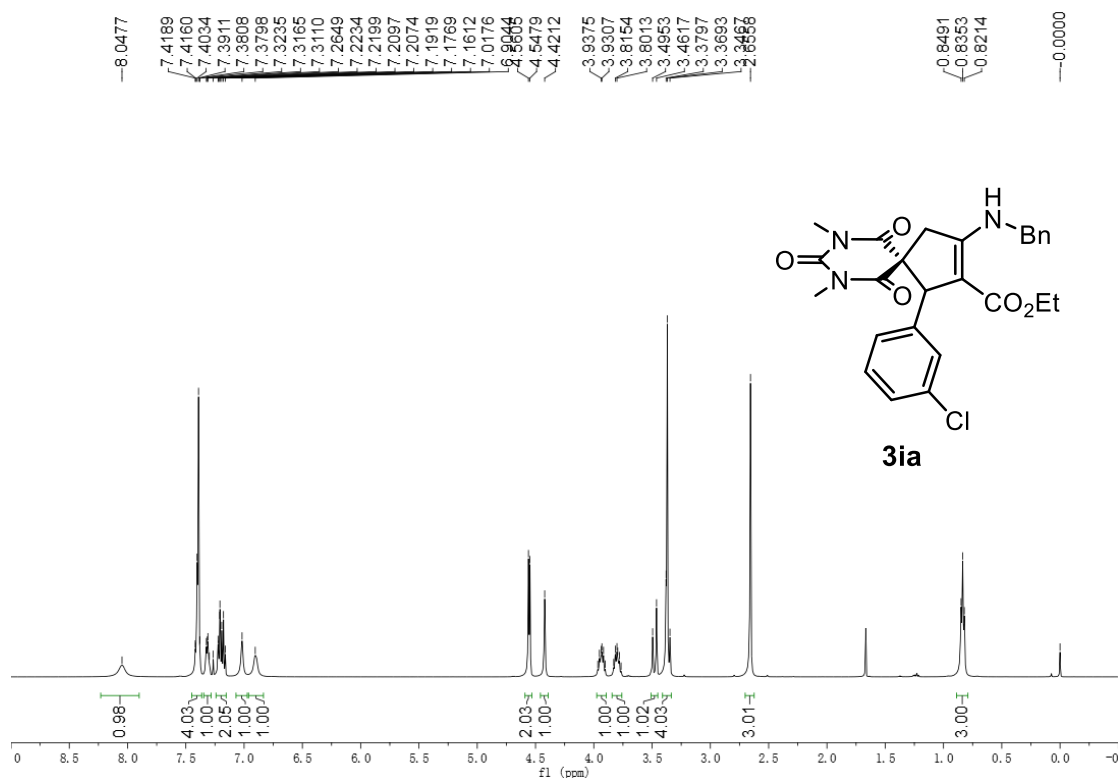

Figure S19. <sup>1</sup>H NMR (500 MHz, CDCl<sub>3</sub>) of compound 3ia

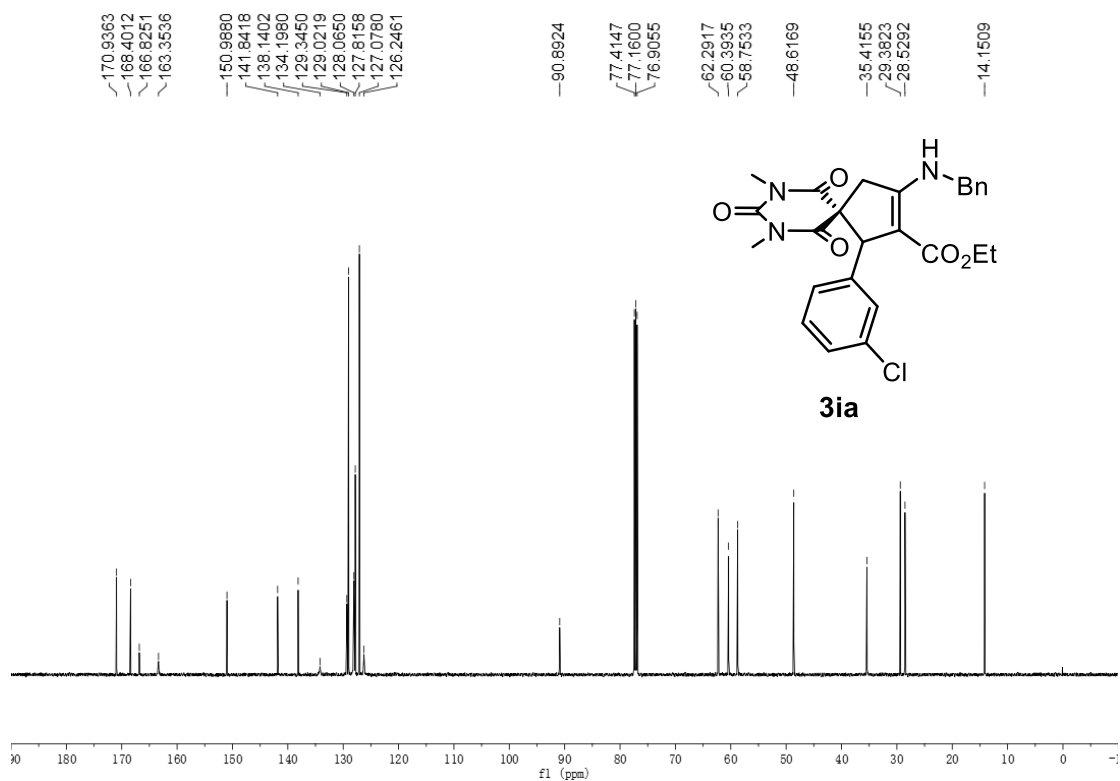

Figure S20. <sup>13</sup>C NMR (125 MHz, CDCl<sub>3</sub>) of compound 3ia

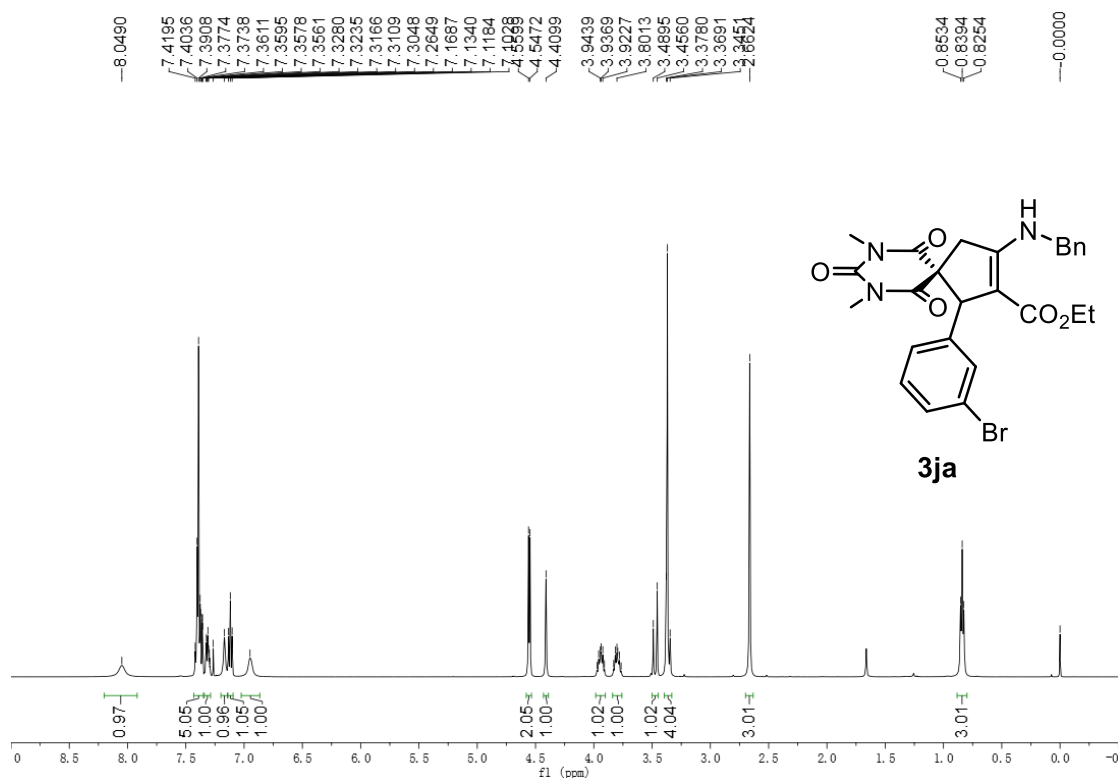

Figure S21. <sup>1</sup>H NMR (500 MHz, CDCl<sub>3</sub>) of compound 3ja

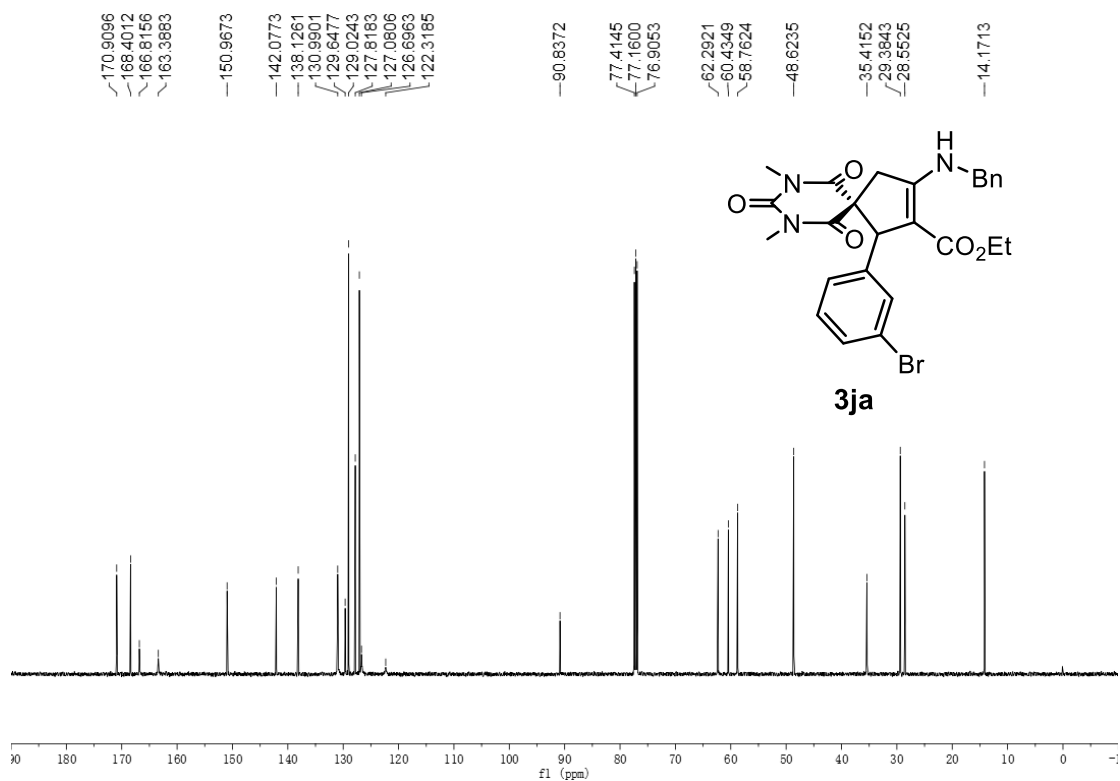

Figure S22. <sup>13</sup>C NMR (125 MHz, CDCl<sub>3</sub>) of compound 3ja

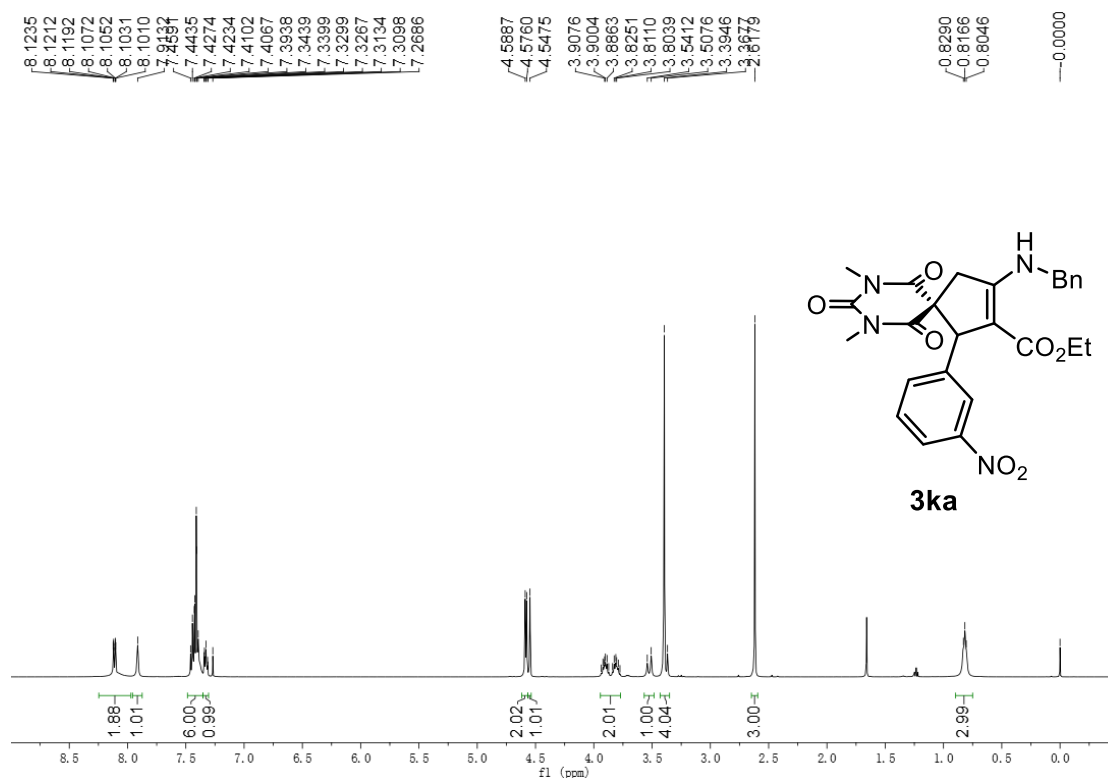

Figure S23. <sup>1</sup>H NMR (500 MHz, CDCl<sub>3</sub>) of compound 3ka

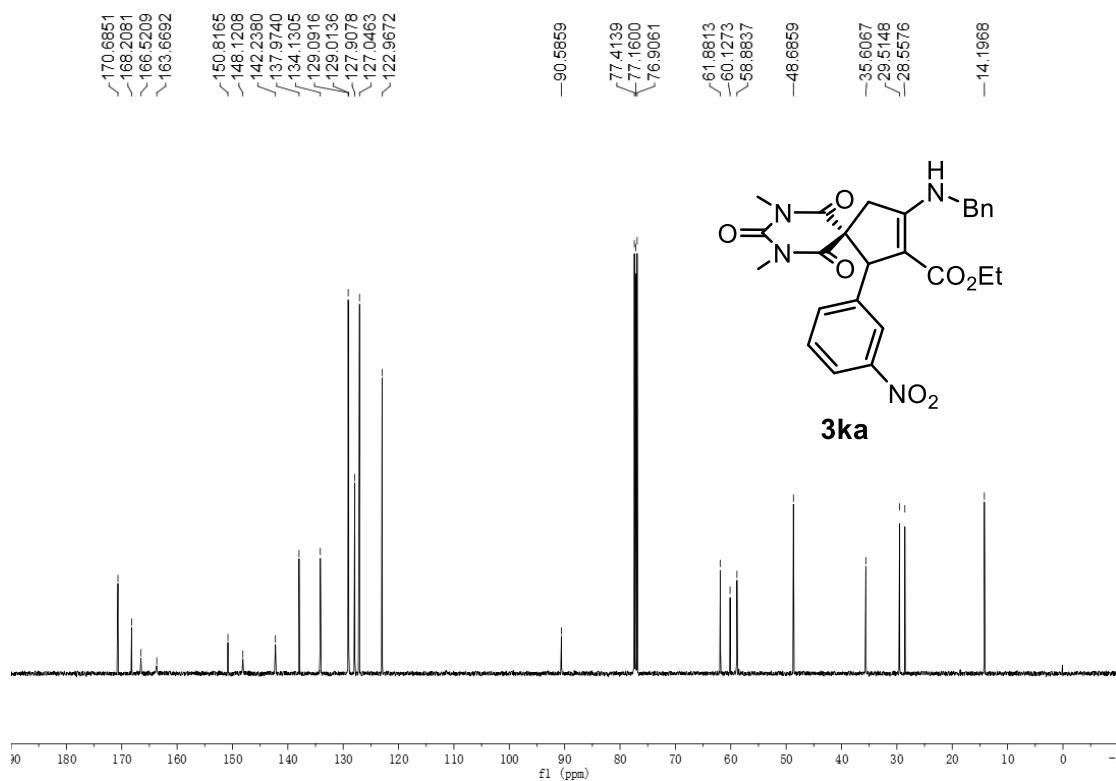

Figure S24. <sup>13</sup>C NMR (125 MHz, CDCl<sub>3</sub>) of compound 3ka

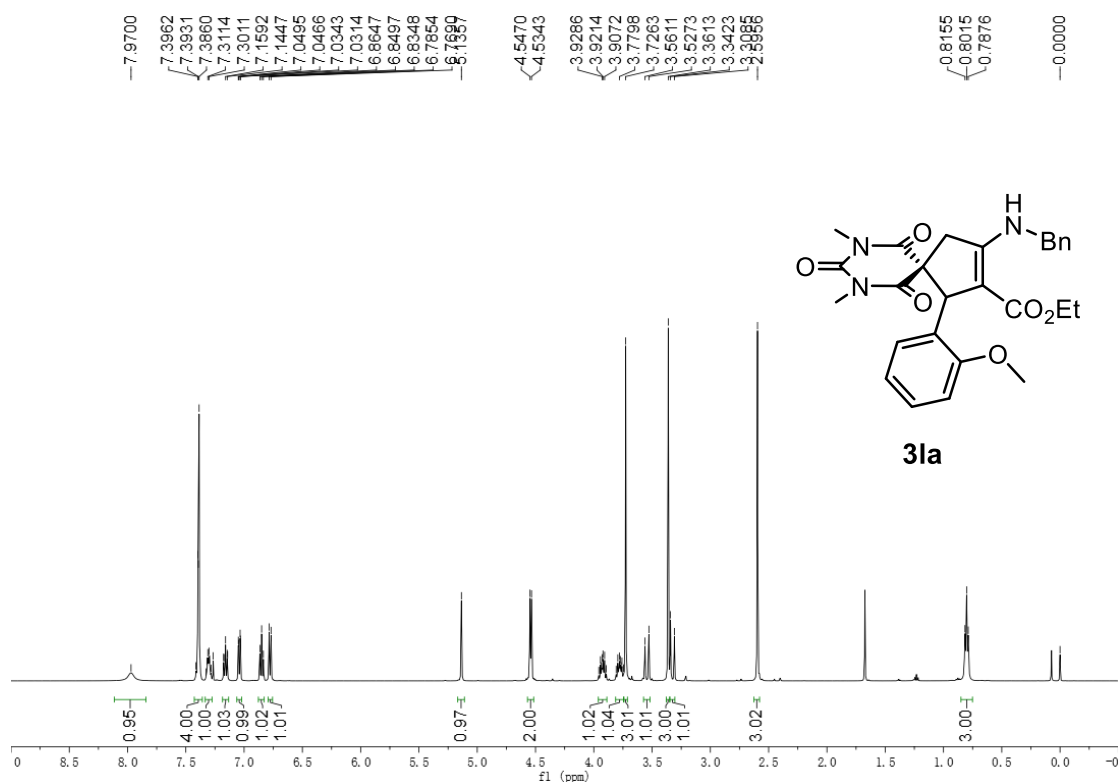

**Figure S25. <sup>1</sup>H NMR (500 MHz, CDCl<sub>3</sub>) of compound 3la**

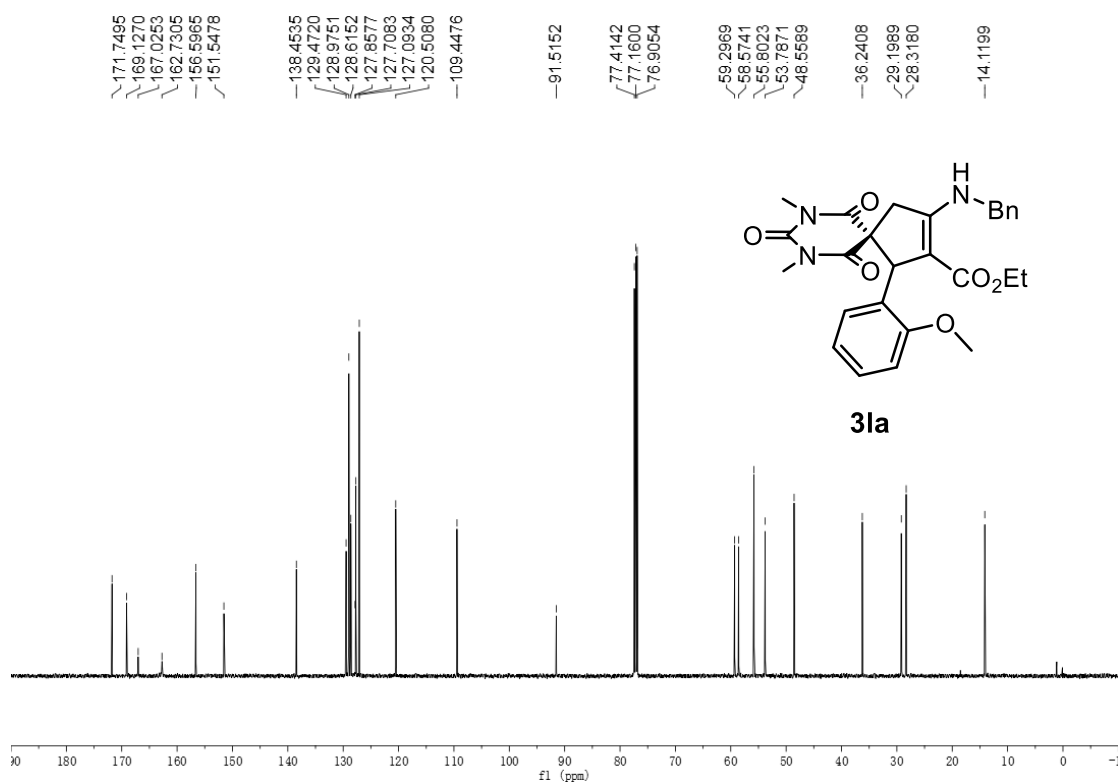

**Figure S26. <sup>13</sup>C NMR (125 MHz, CDCl<sub>3</sub>) of compound 3la**

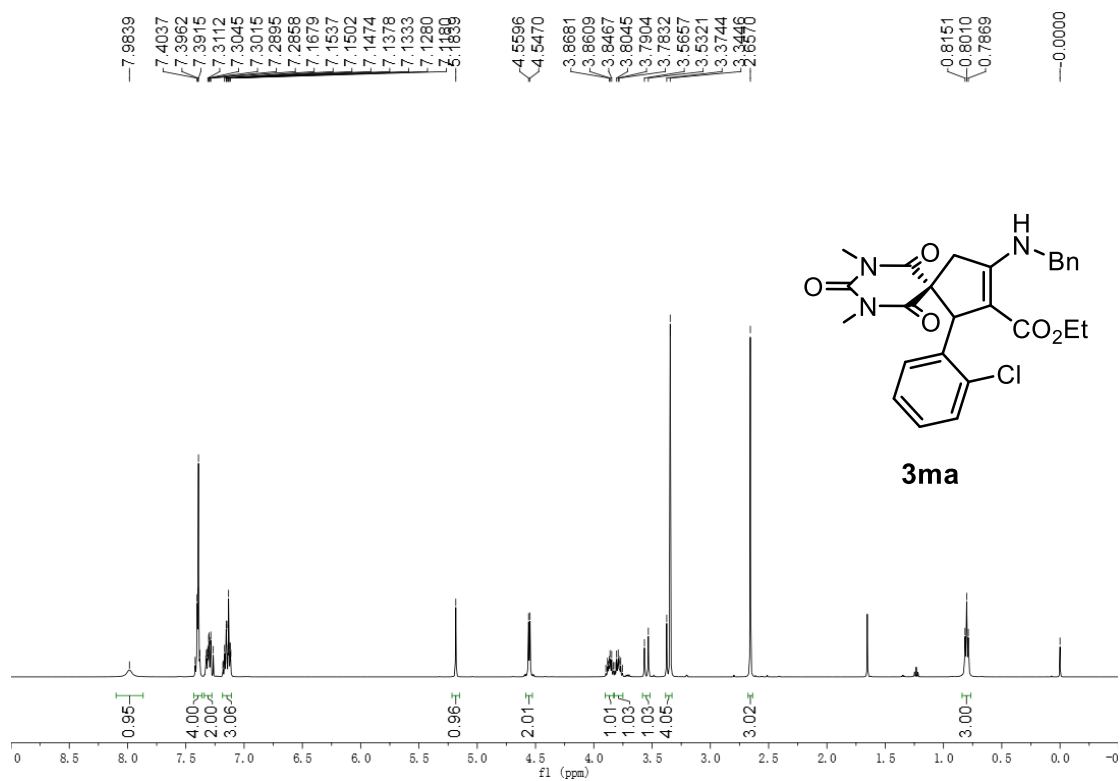

**Figure S27.** <sup>1</sup>H NMR (500 MHz, CDCl<sub>3</sub>) of compound 3ma

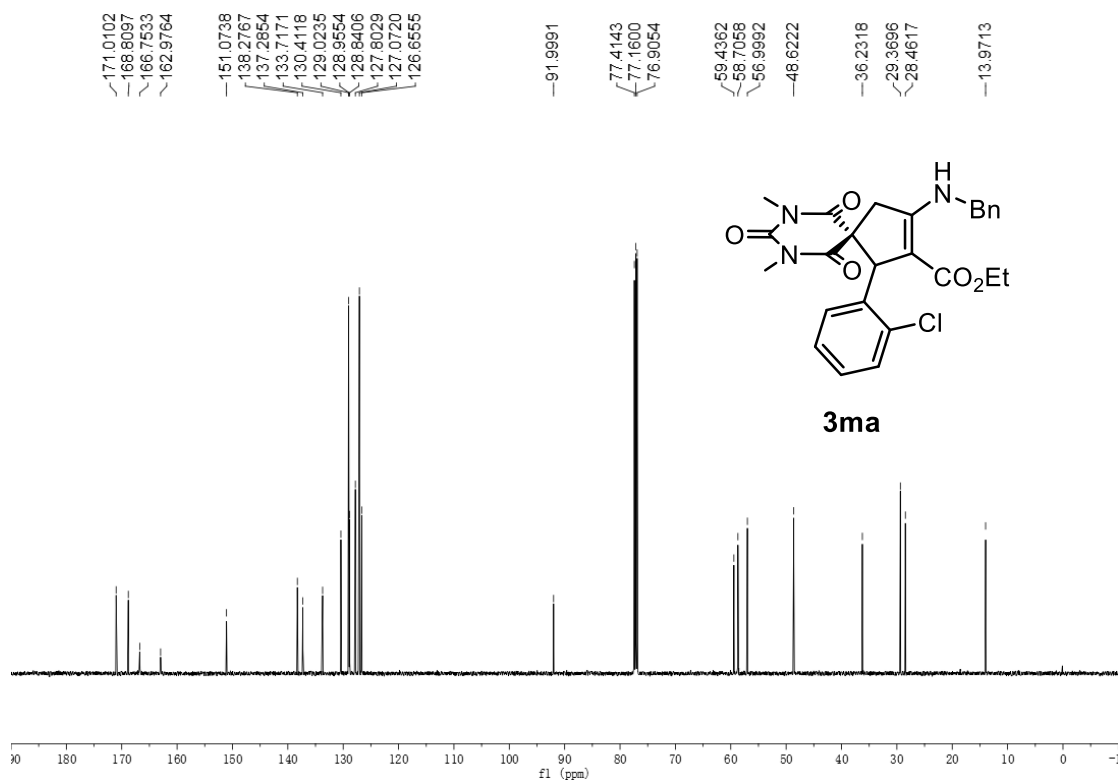

**Figure S28.** <sup>13</sup>C NMR (125 MHz, CDCl<sub>3</sub>) of compound 3ma

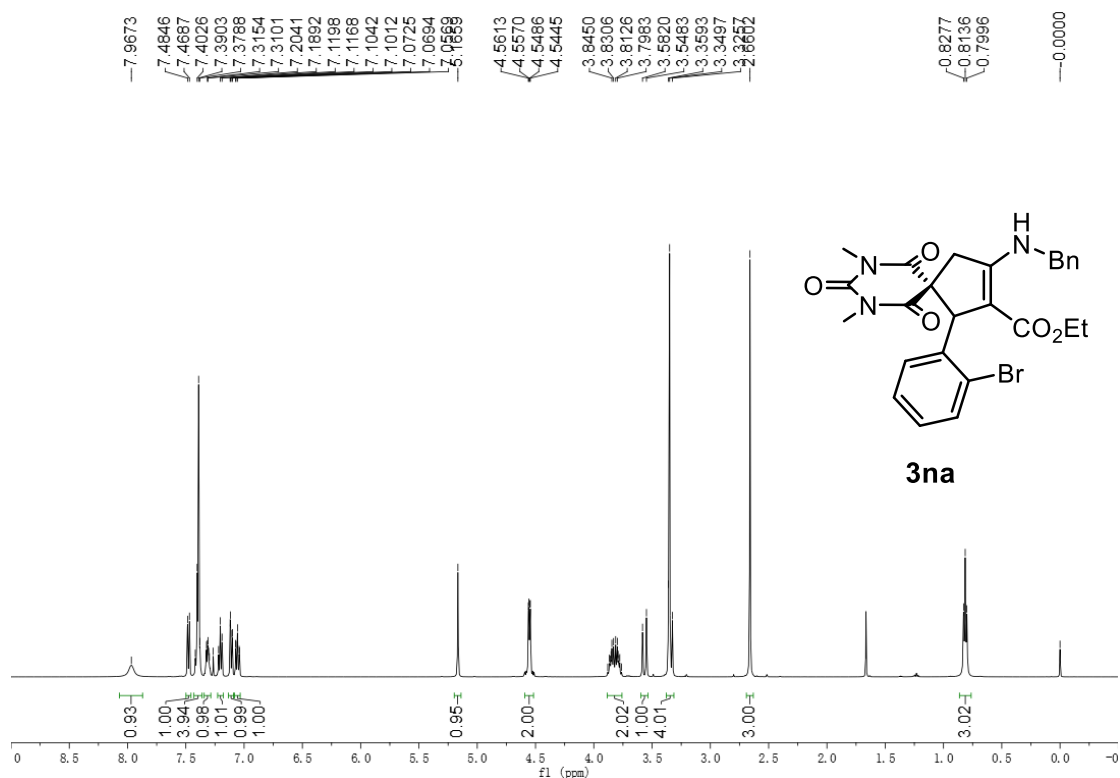

Figure S29. <sup>1</sup>H NMR (500 MHz, CDCl<sub>3</sub>) of compound 3na

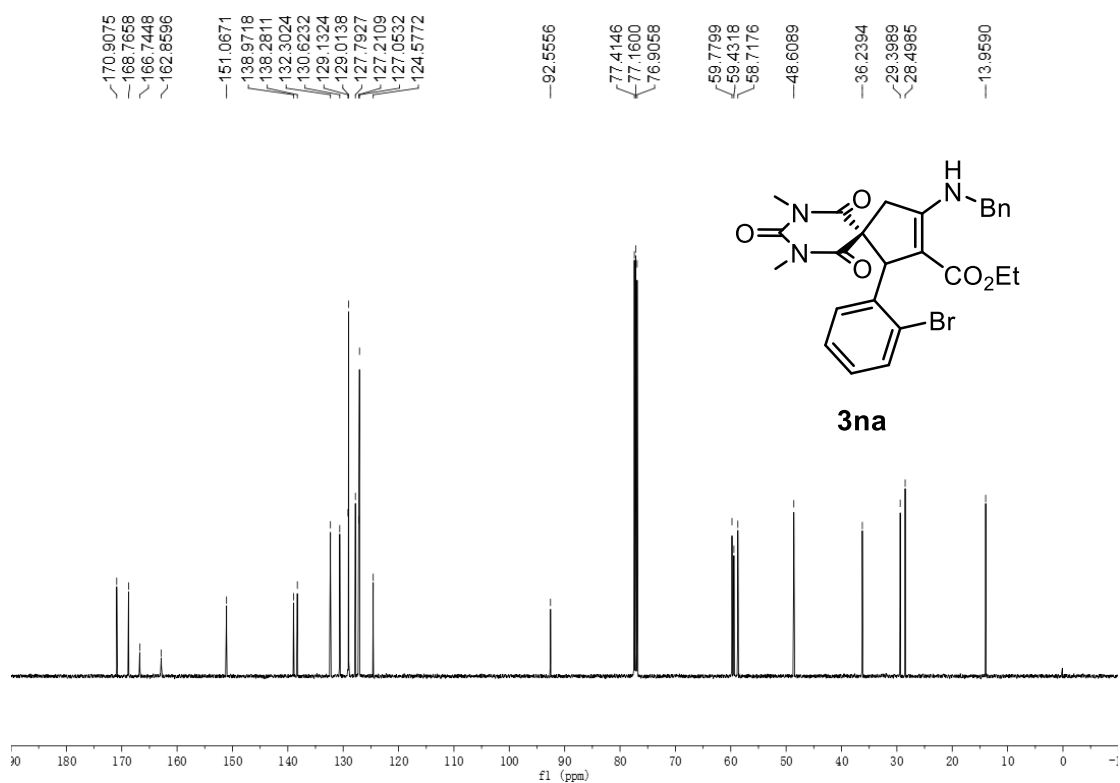

Figure S30. <sup>13</sup>C NMR (125 MHz, CDCl<sub>3</sub>) of compound 3na



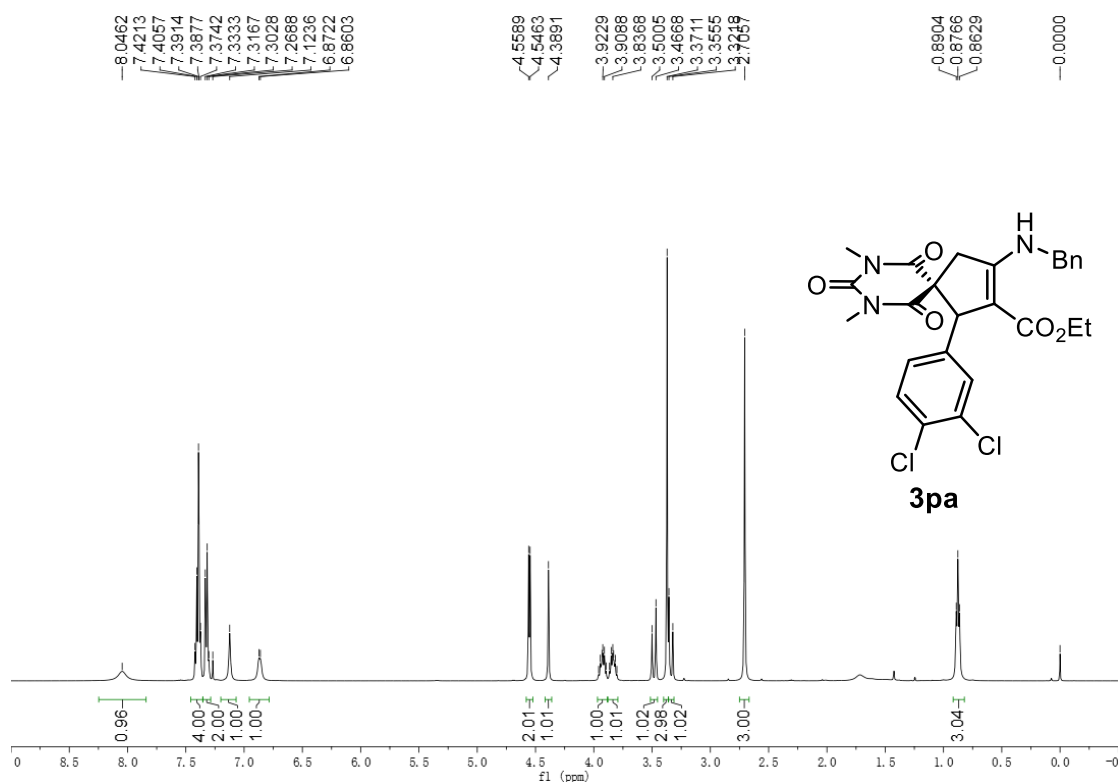

**Figure S33. <sup>1</sup>H NMR (500 MHz, CDCl<sub>3</sub>) of compound 3pa**

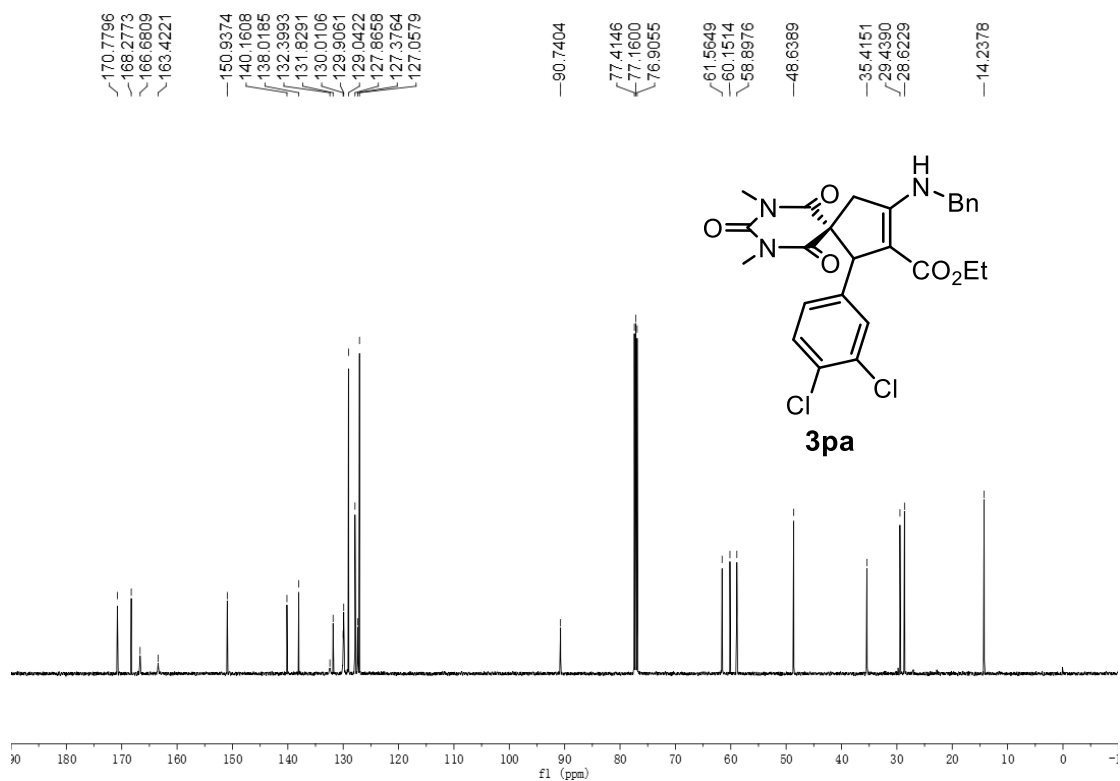

**Figure S34. <sup>13</sup>C NMR (125 MHz, CDCl<sub>3</sub>) of compound 3pa**

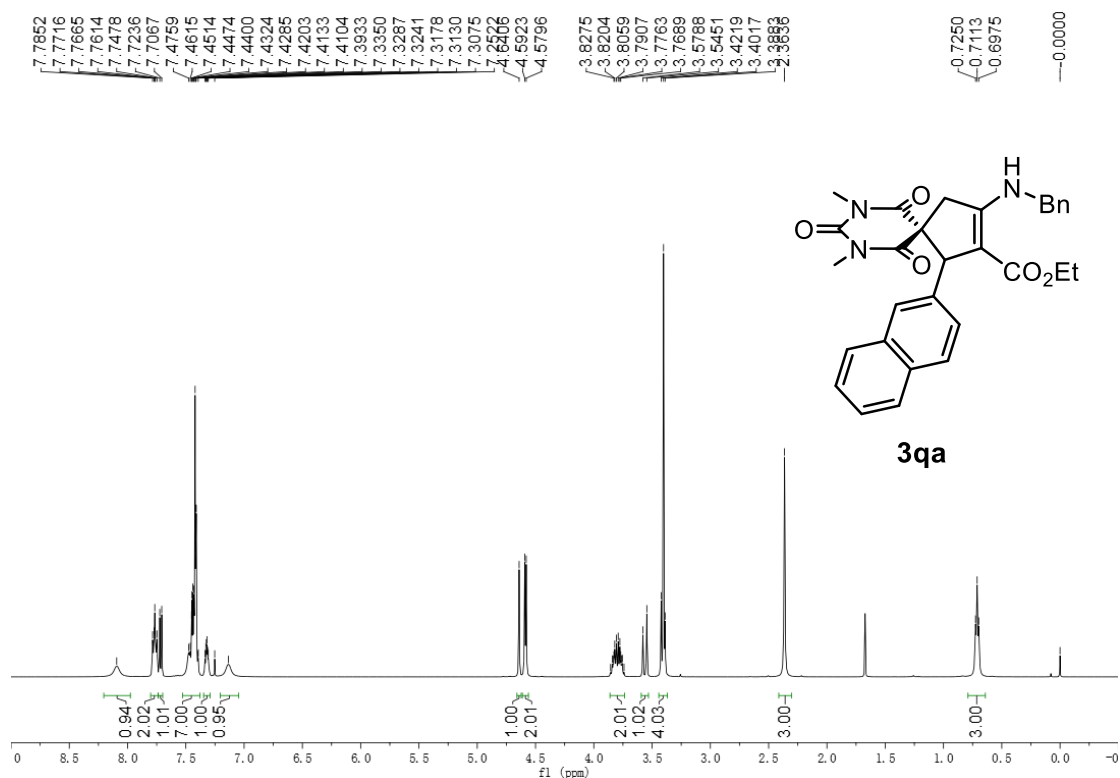

**Figure S35. <sup>1</sup>H NMR (500 MHz, CDCl<sub>3</sub>) of compound 3qa**

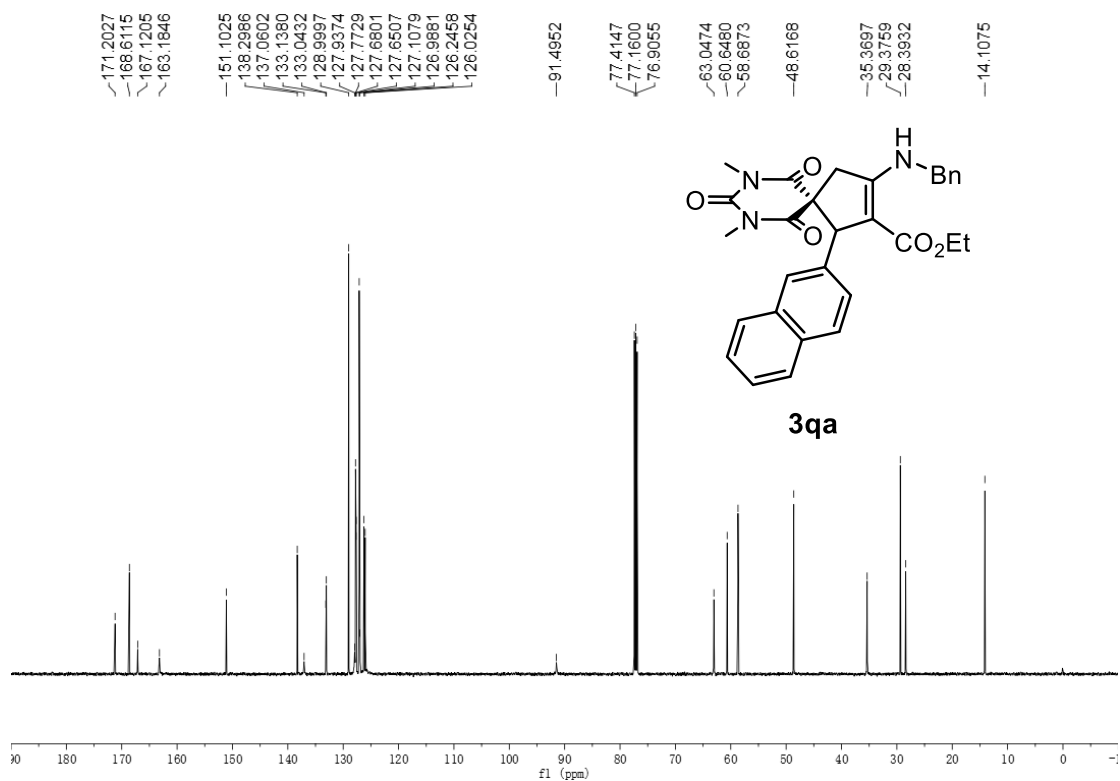

**Figure S36. <sup>13</sup>C NMR (125 MHz, CDCl<sub>3</sub>) of compound 3qa**

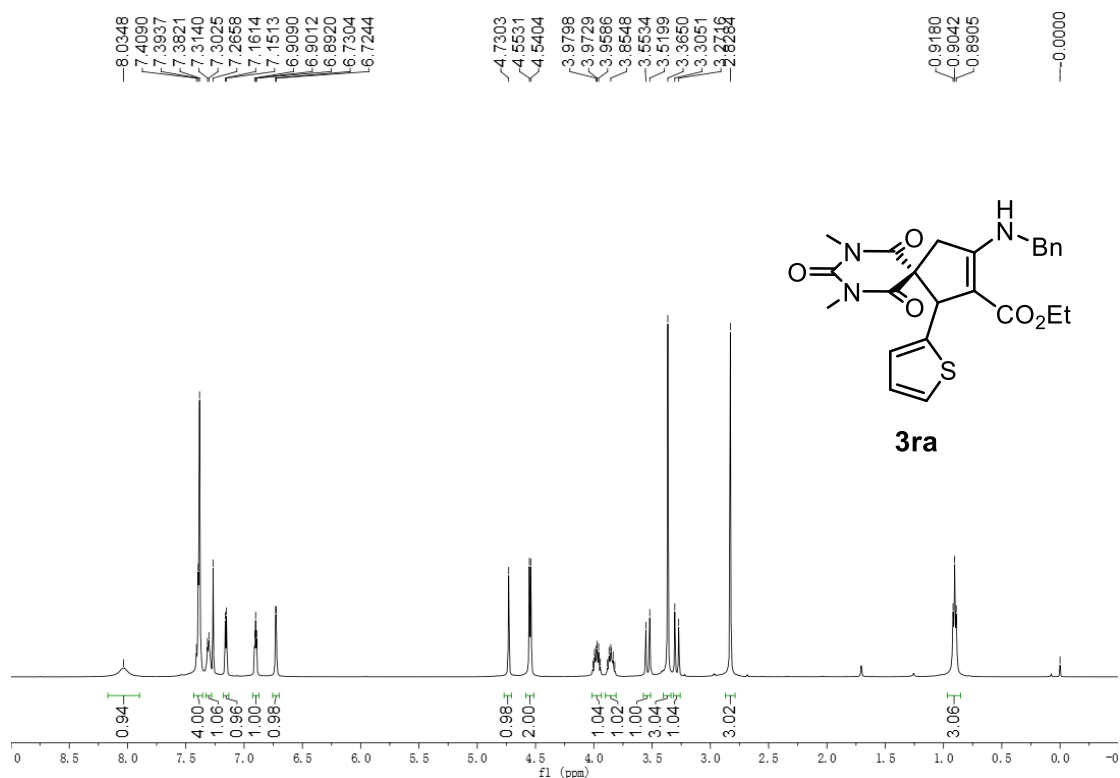

Figure S37. <sup>1</sup>H NMR (500 MHz, CDCl<sub>3</sub>) of compound 3ra

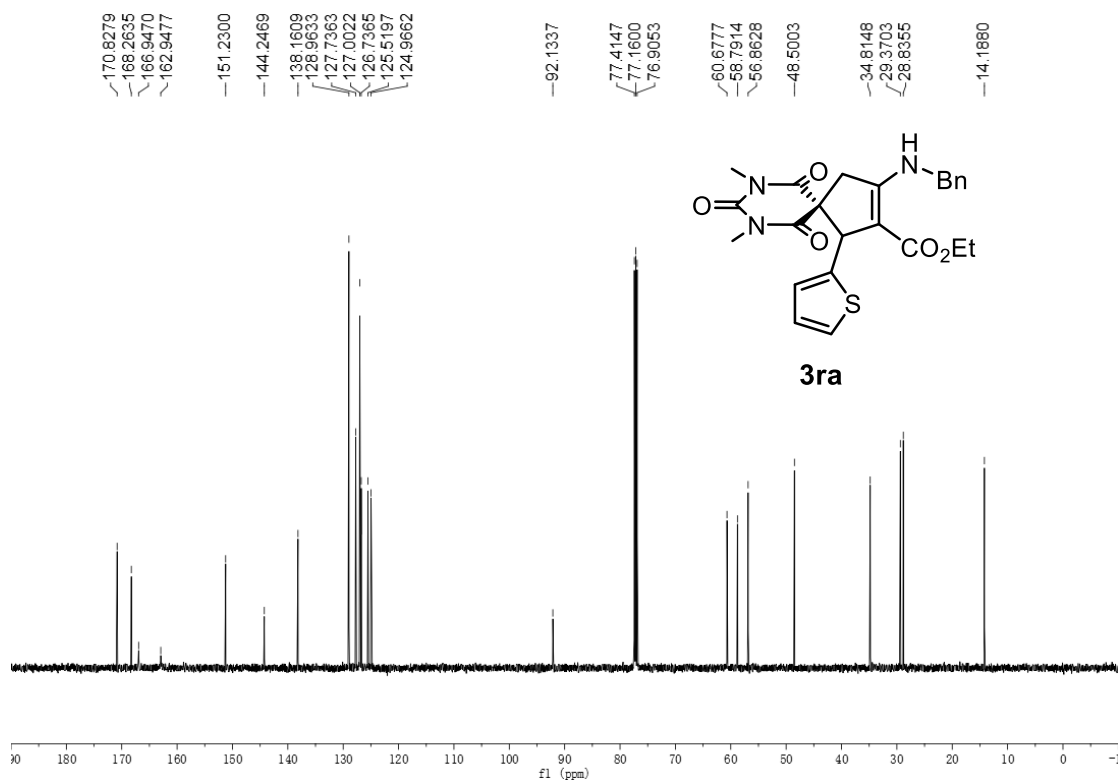

Figure S38. <sup>13</sup>C NMR (125 MHz, CDCl<sub>3</sub>) of compound 3ra

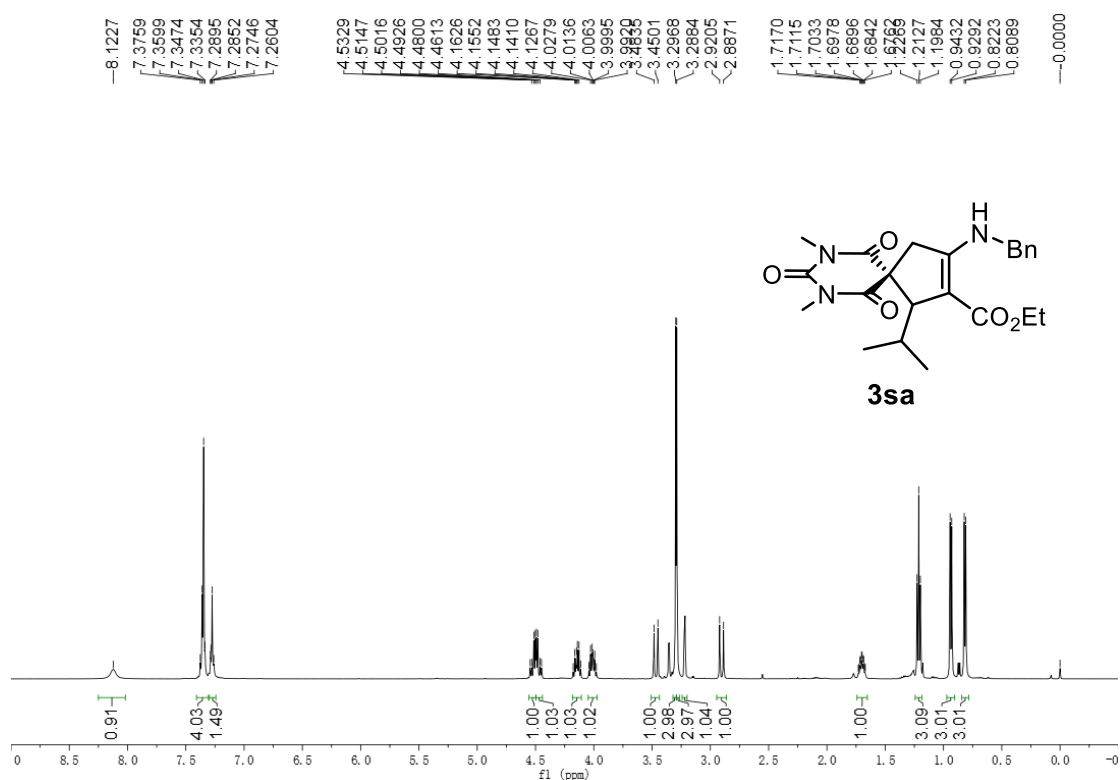

**Figure S39. <sup>1</sup>H NMR (500 MHz, CDCl<sub>3</sub>) of compound 3sa**

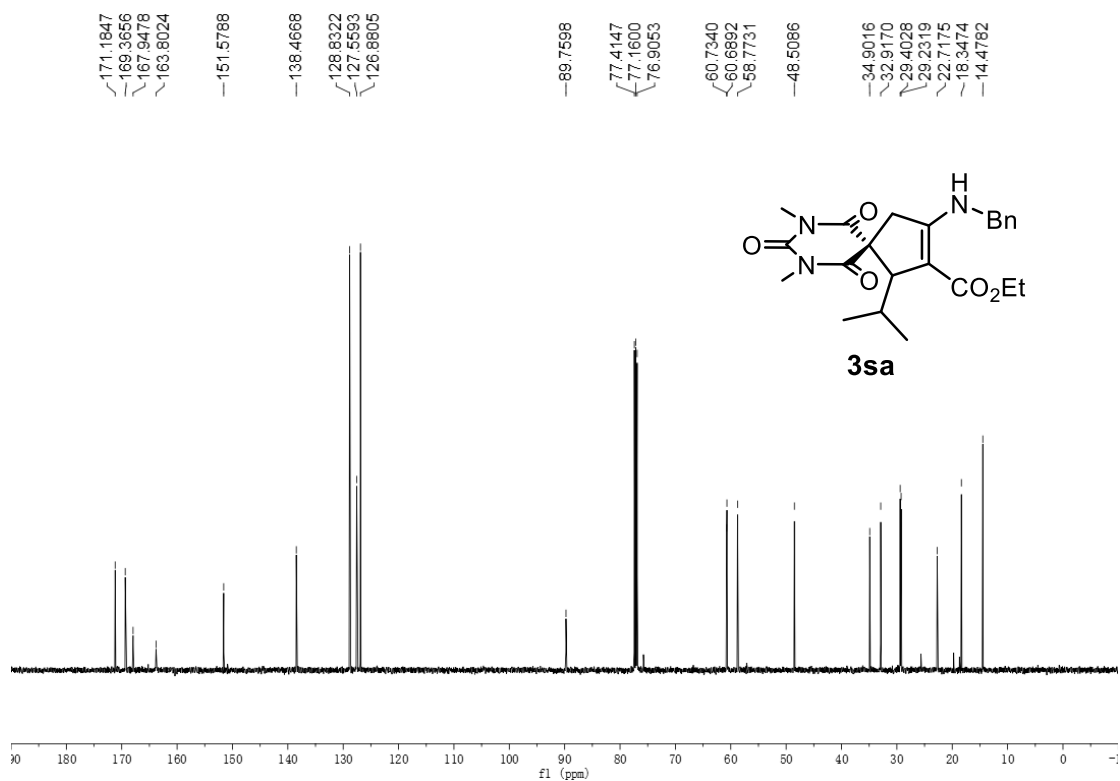

**Figure S40. <sup>13</sup>C NMR (125 MHz, CDCl<sub>3</sub>) of compound 3sa**

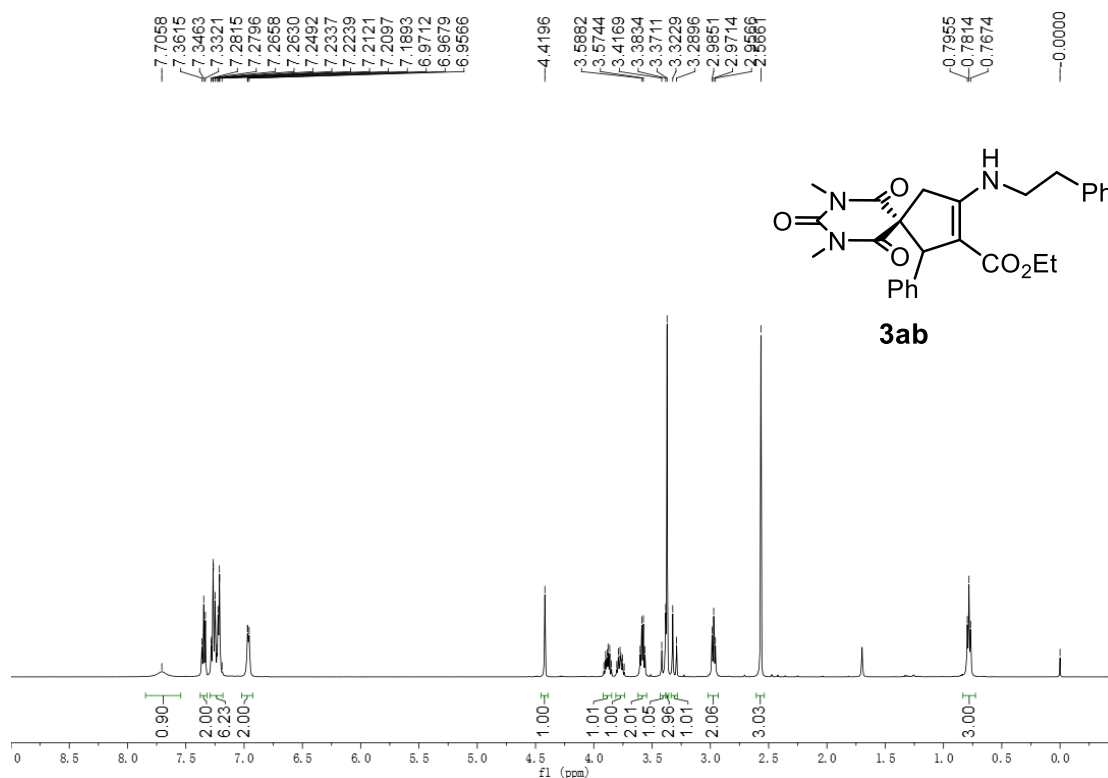

Figure S41. <sup>1</sup>H NMR (500 MHz, CDCl<sub>3</sub>) of compound 3ab

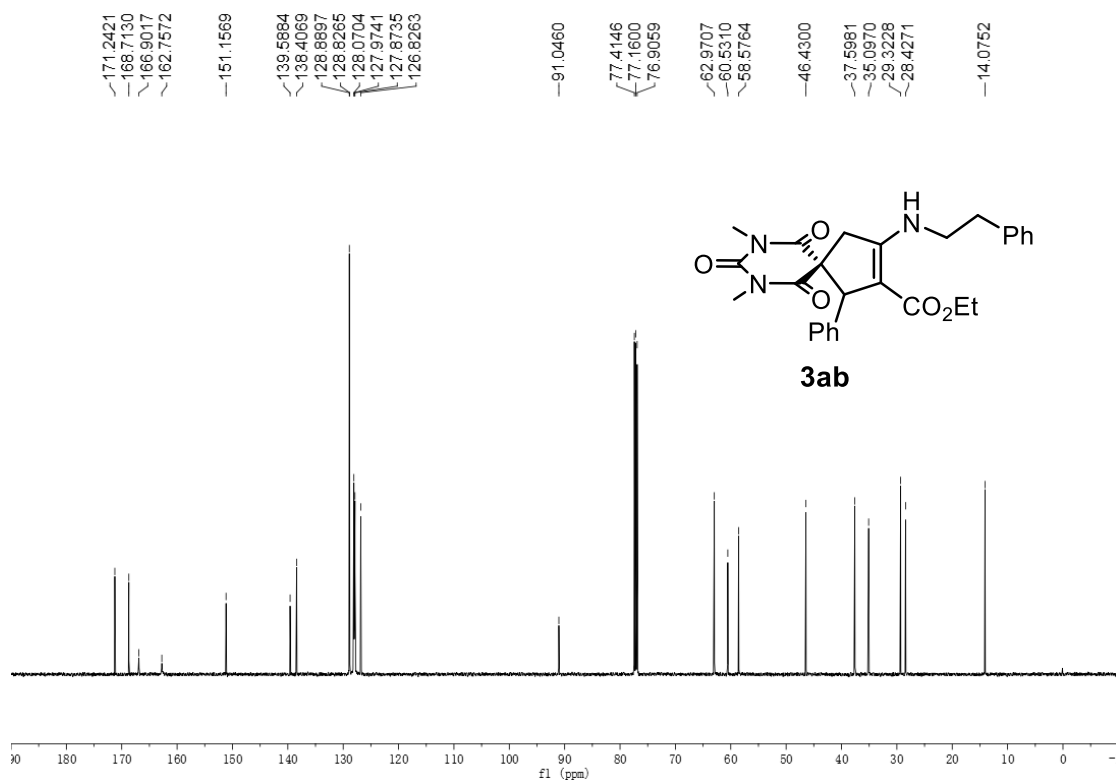

Figure S42. <sup>13</sup>C NMR (125 MHz, CDCl<sub>3</sub>) of compound 3ab

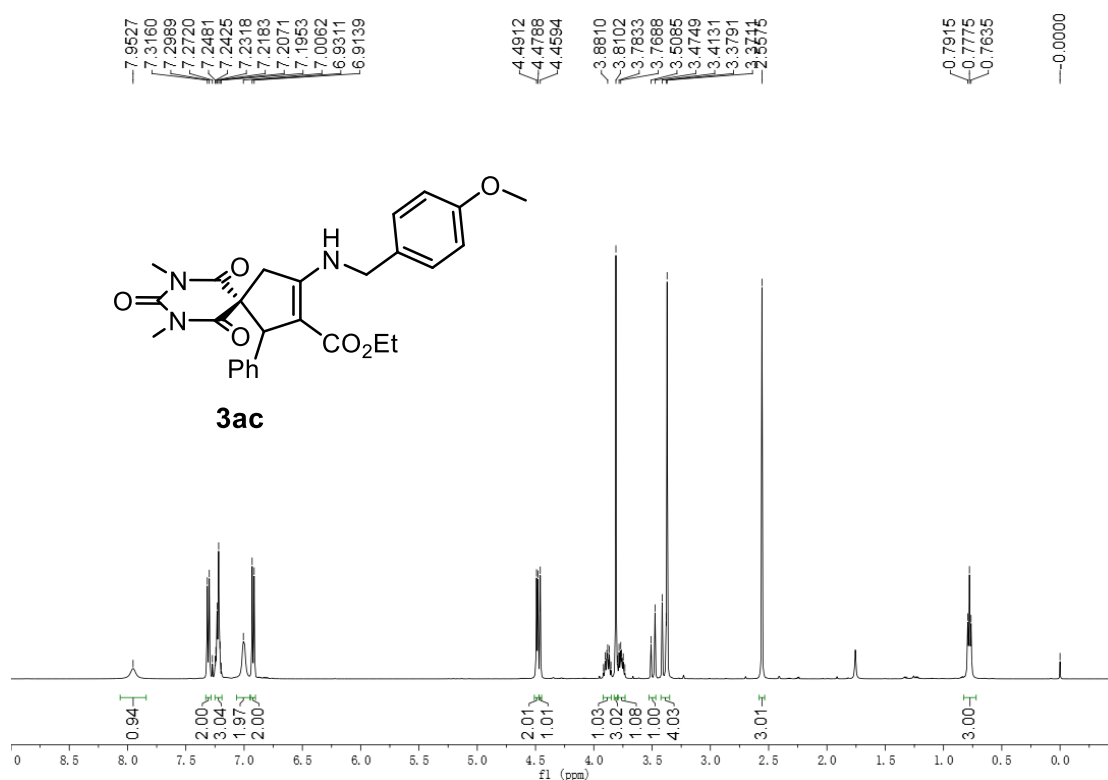

Figure S43. <sup>1</sup>H NMR (500 MHz, CDCl<sub>3</sub>) of compound 3ac

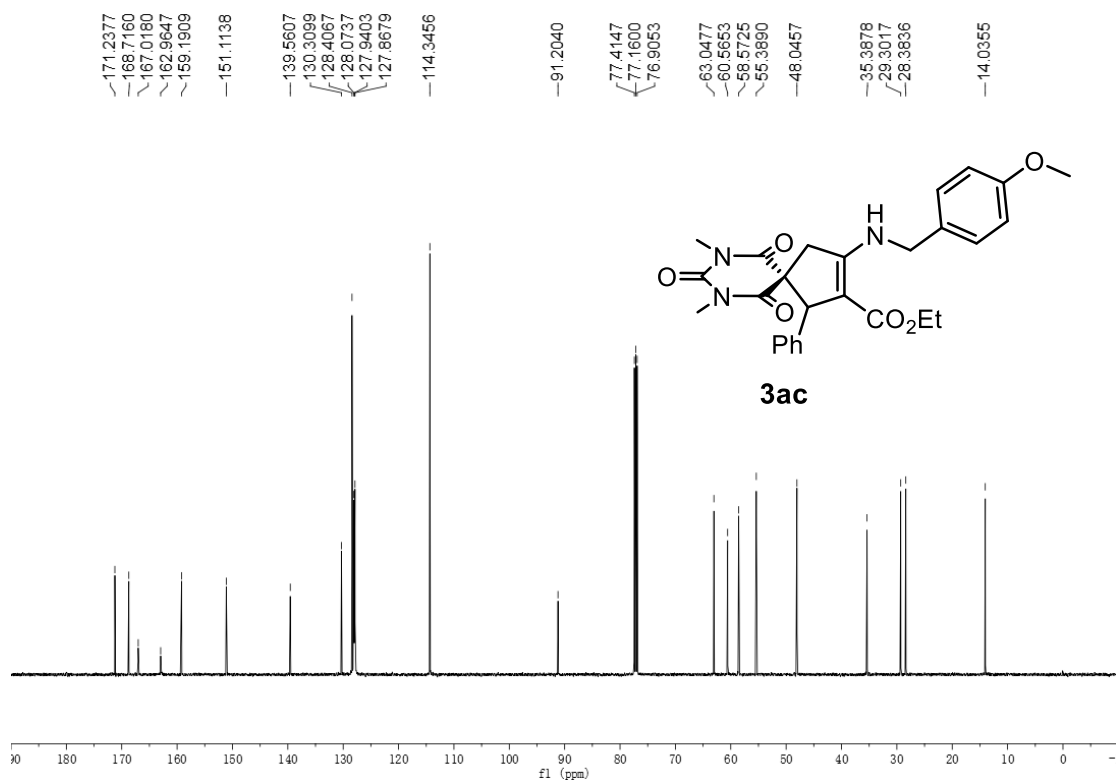

Figure S44. <sup>13</sup>C NMR (125 MHz, CDCl<sub>3</sub>) of compound 3ac

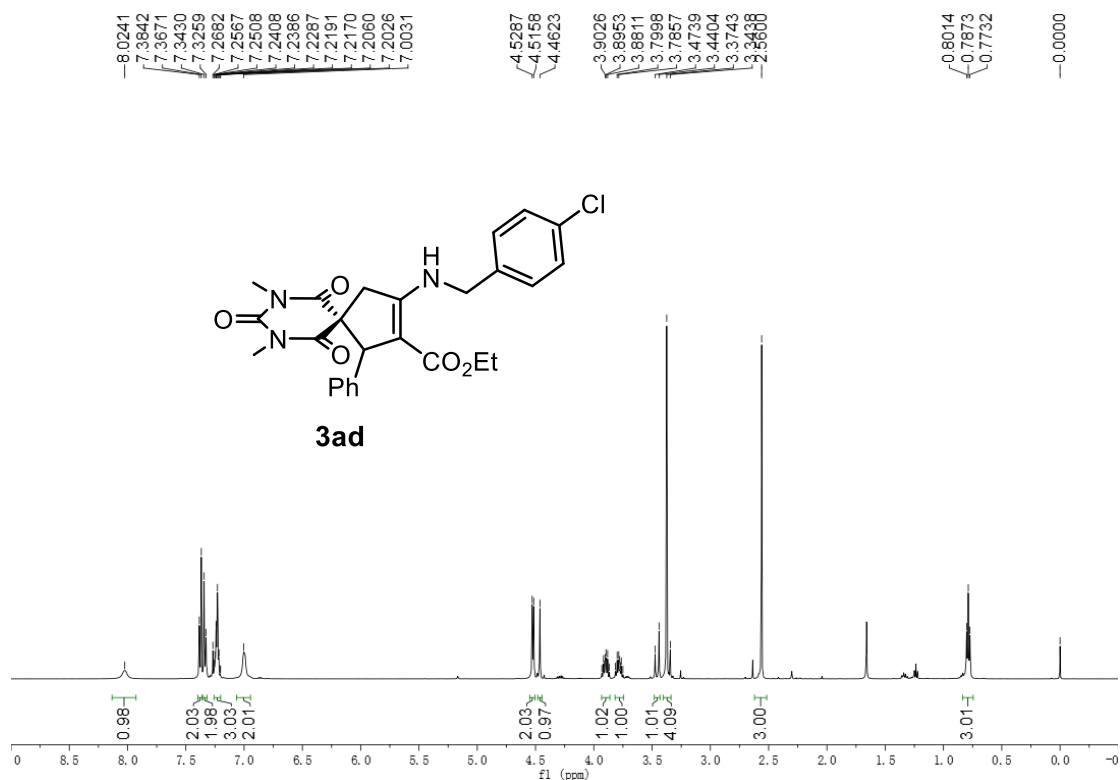

**Figure S45. <sup>1</sup>H NMR (500 MHz, CDCl<sub>3</sub>) of compound 3ad**

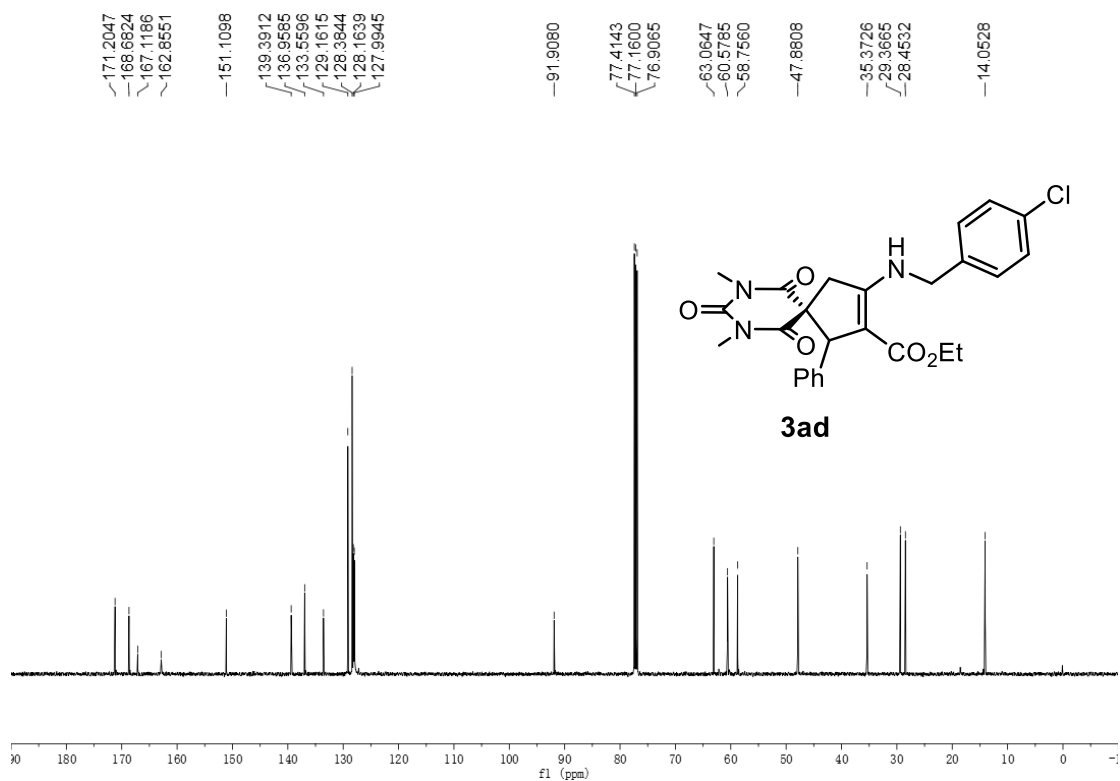

**Figure S46. <sup>13</sup>C NMR (125 MHz, CDCl<sub>3</sub>) of compound 3ad**

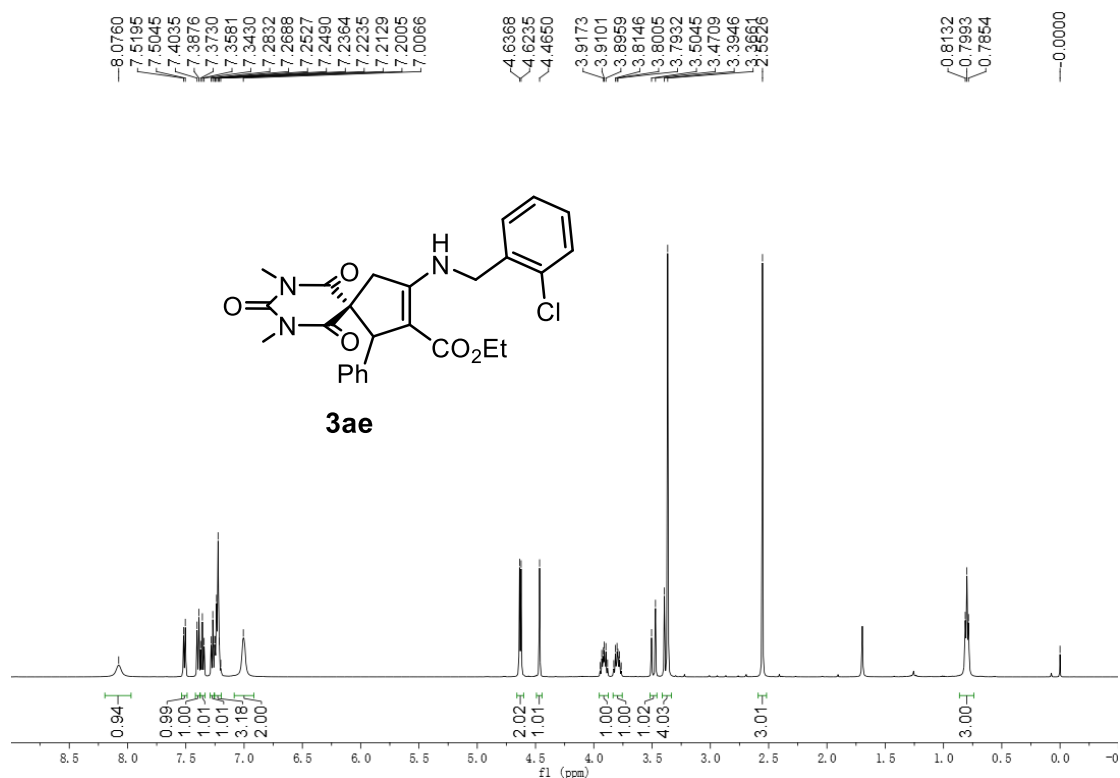

Figure S47. <sup>1</sup>H NMR (500 MHz, CDCl<sub>3</sub>) of compound 3ae

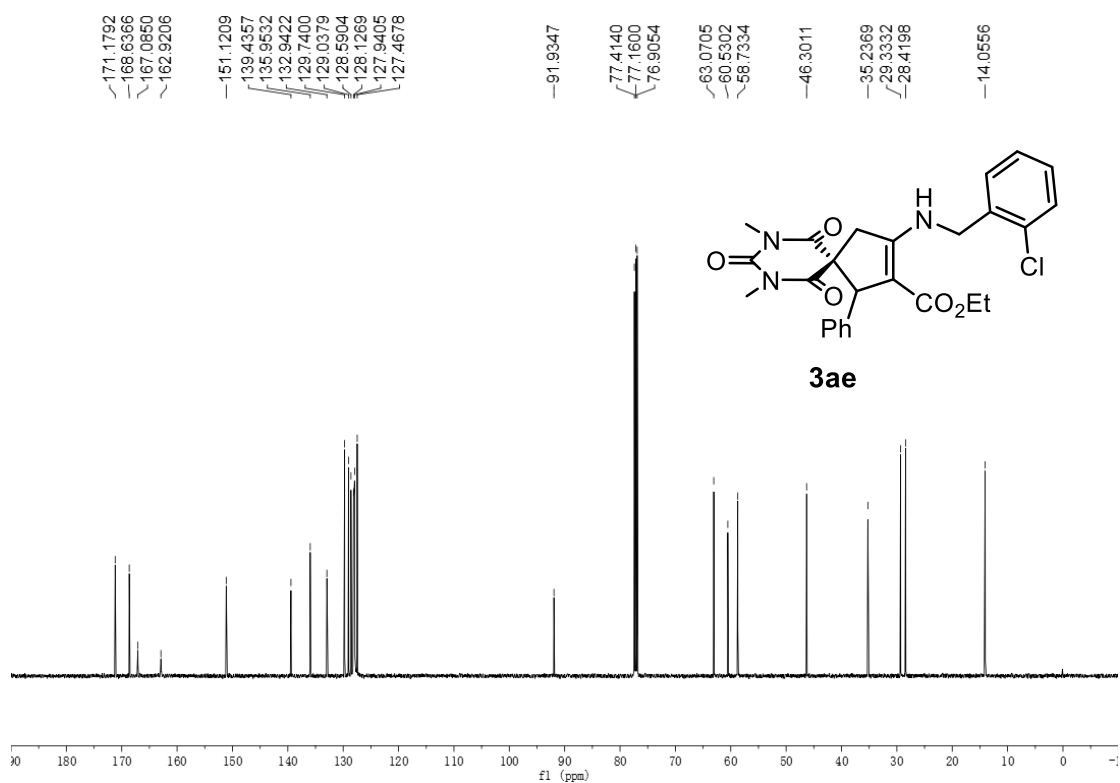

Figure S48. <sup>13</sup>C NMR (125 MHz, CDCl<sub>3</sub>) of compound 3ae

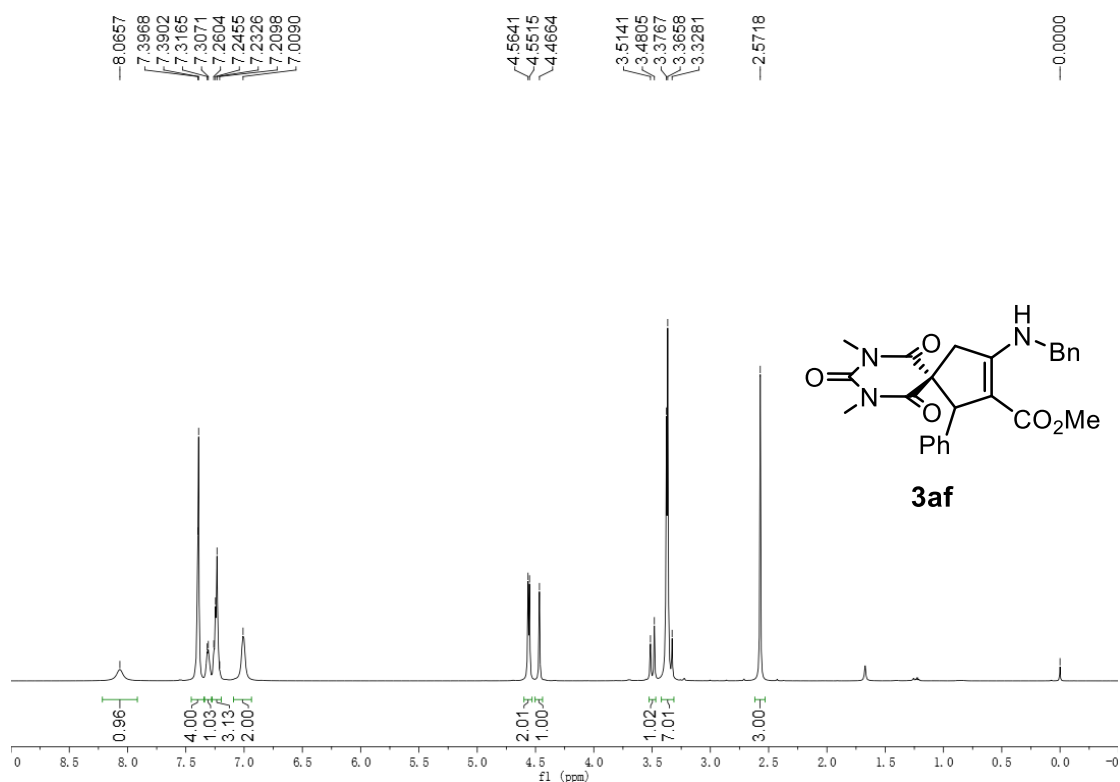

**Figure S49. <sup>1</sup>H NMR (500 MHz, CDCl<sub>3</sub>) of compound 3af**

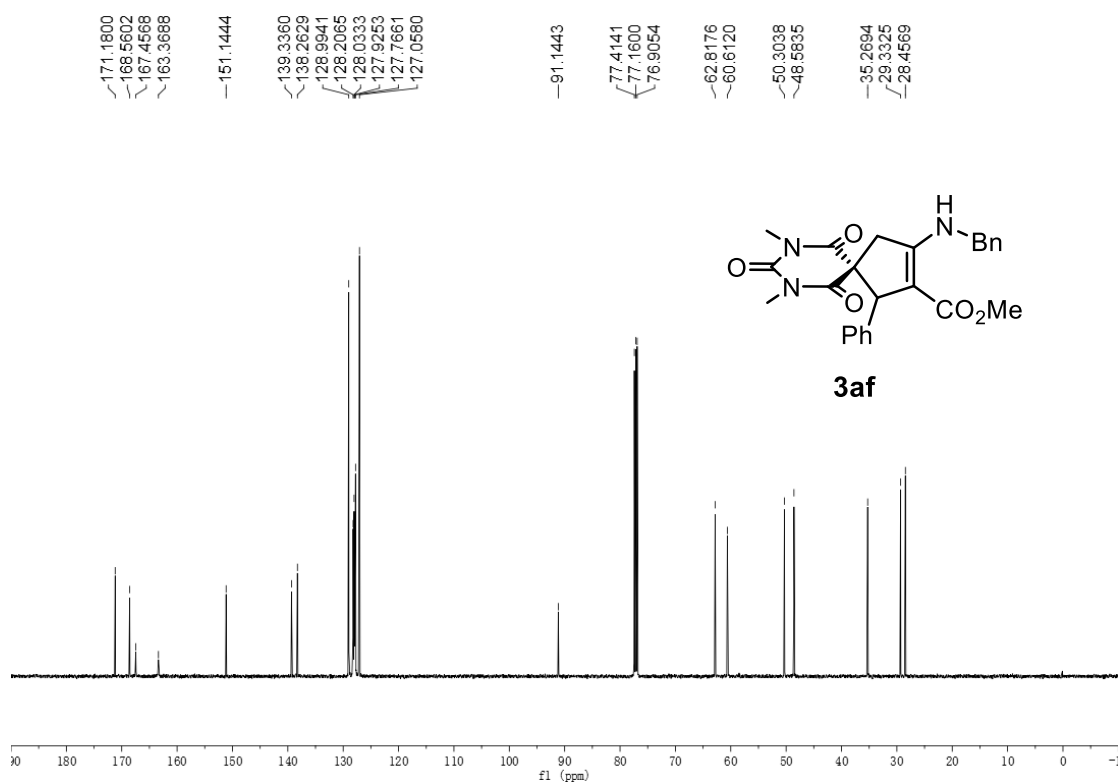

**Figure S50. <sup>13</sup>C NMR (125 MHz, CDCl<sub>3</sub>) of compound 3af**



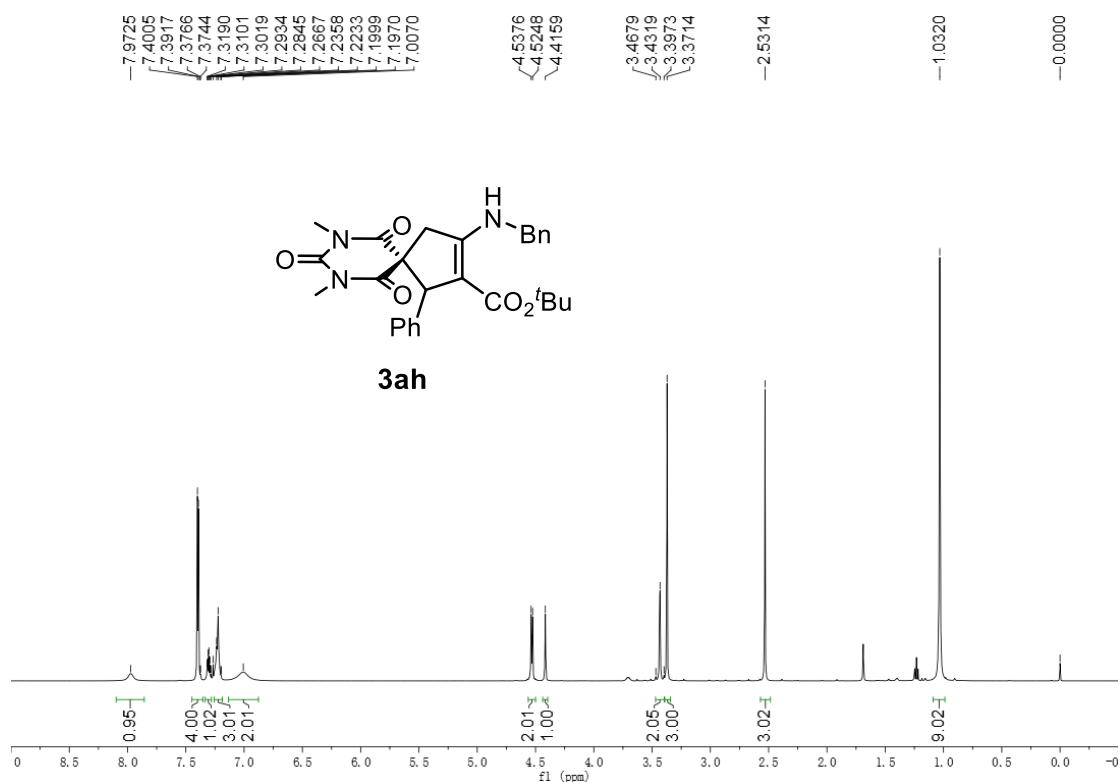

Figure S53. <sup>1</sup>H NMR (500 MHz, CDCl<sub>3</sub>) of compound **3ah**

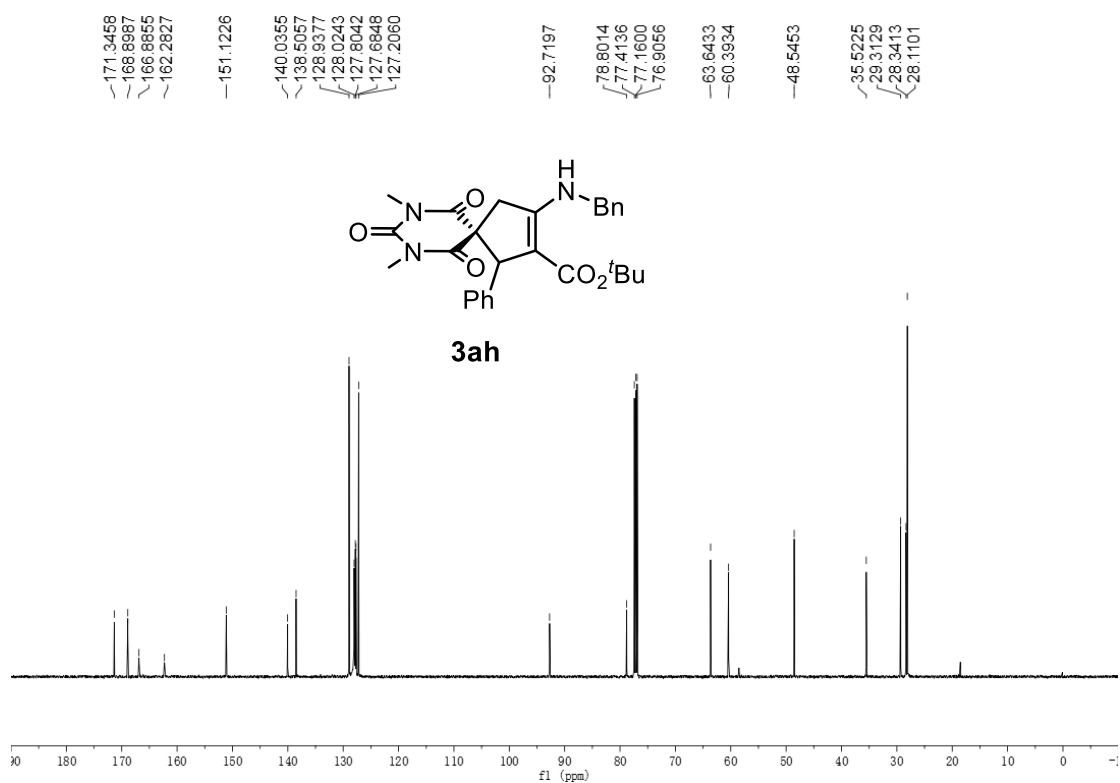

Figure S54. <sup>13</sup>C NMR (125 MHz, CDCl<sub>3</sub>) of compound **3ah**

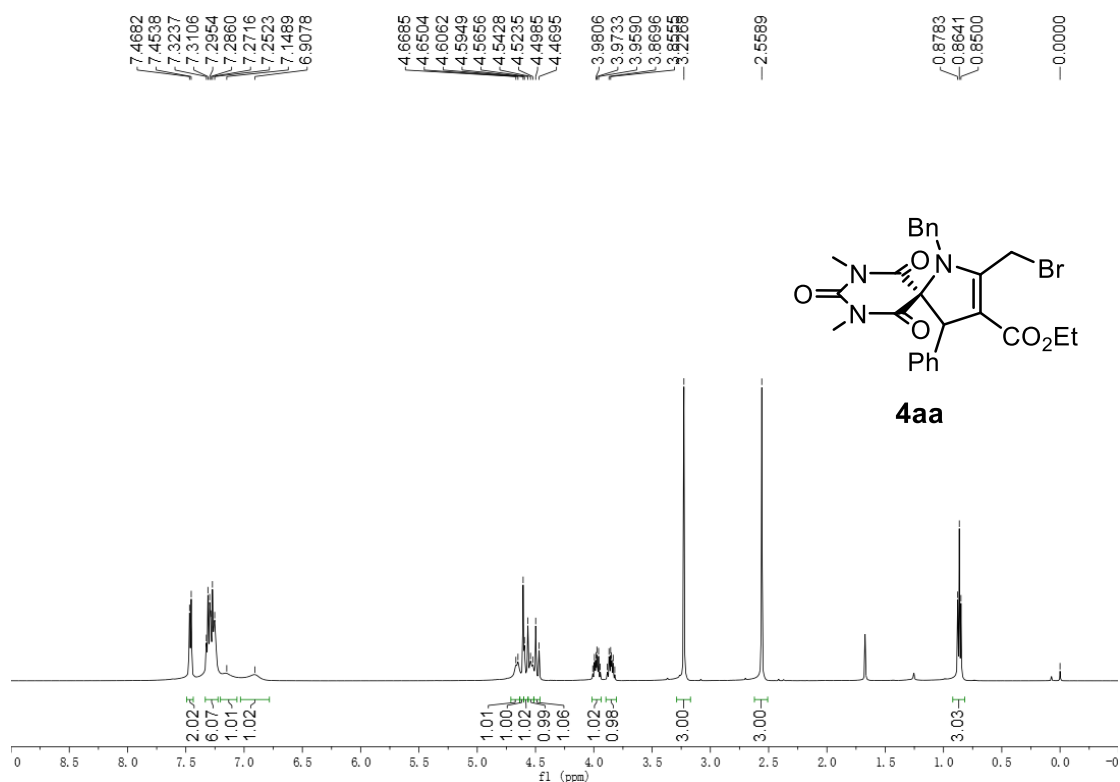

**Figure S55. <sup>1</sup>H NMR (500 MHz, CDCl<sub>3</sub>) of compound 4aa**

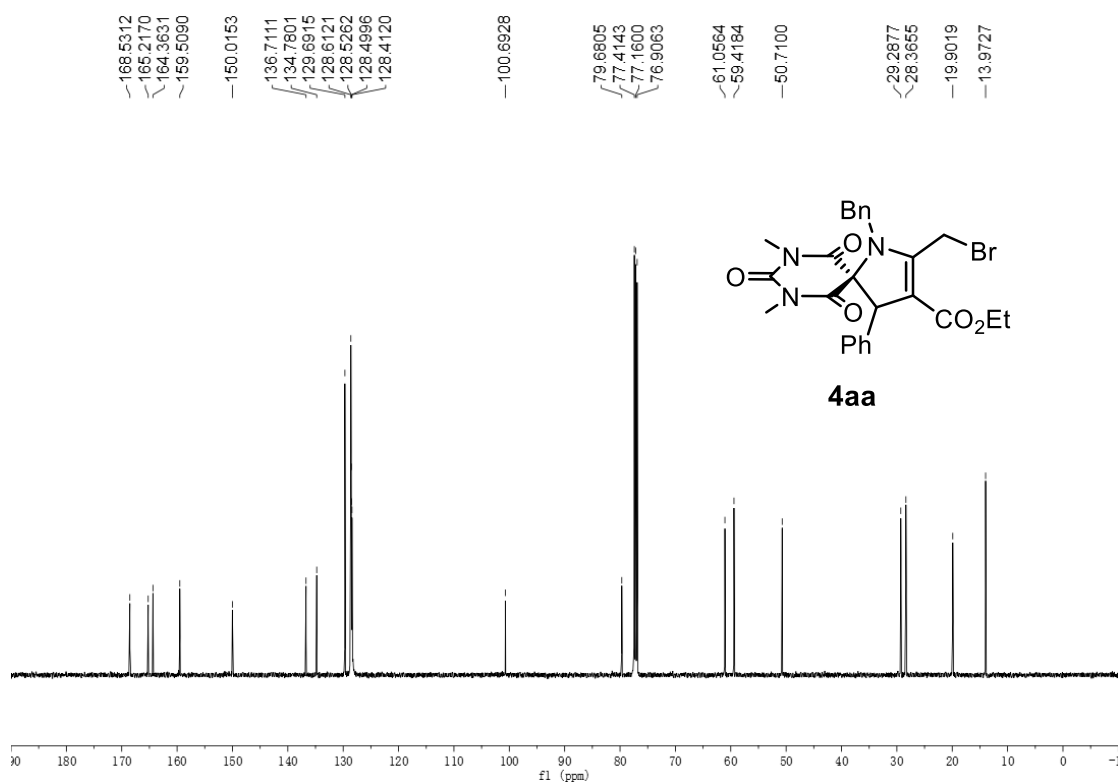

**Figure S56. <sup>13</sup>C NMR (125 MHz, CDCl<sub>3</sub>) of compound 4aa**

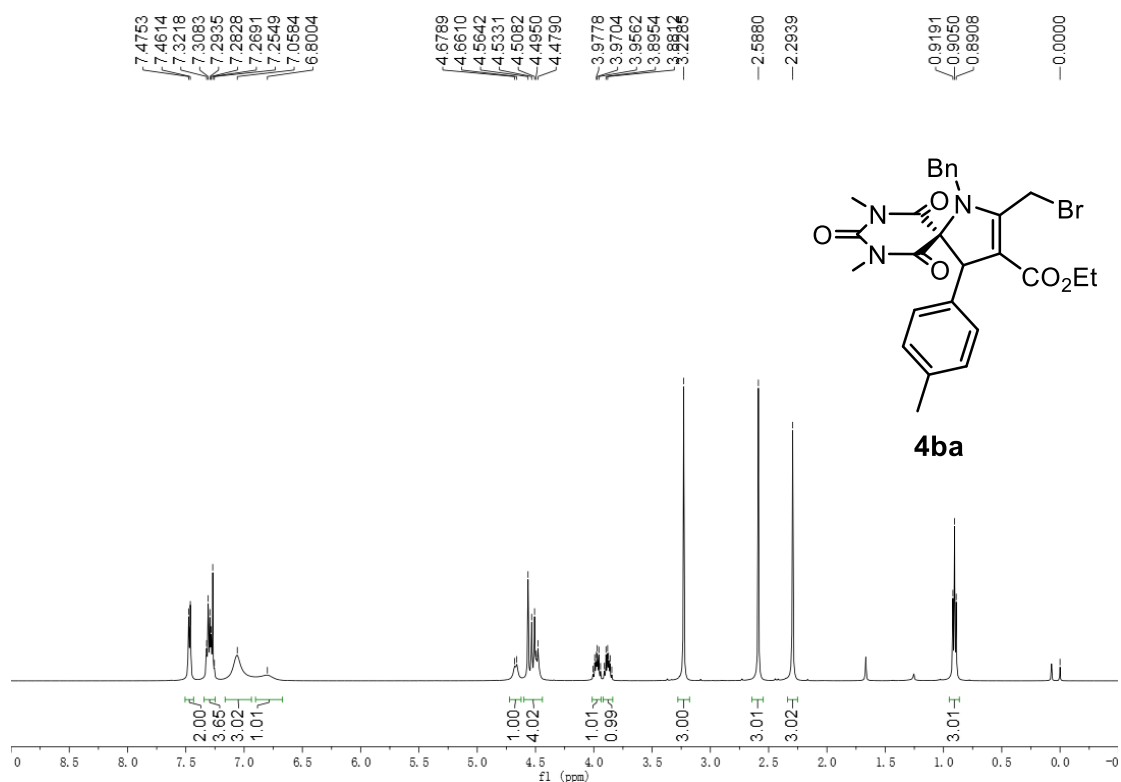

**Figure S57. <sup>1</sup>H NMR (500 MHz, CDCl<sub>3</sub>) of compound 4ba**

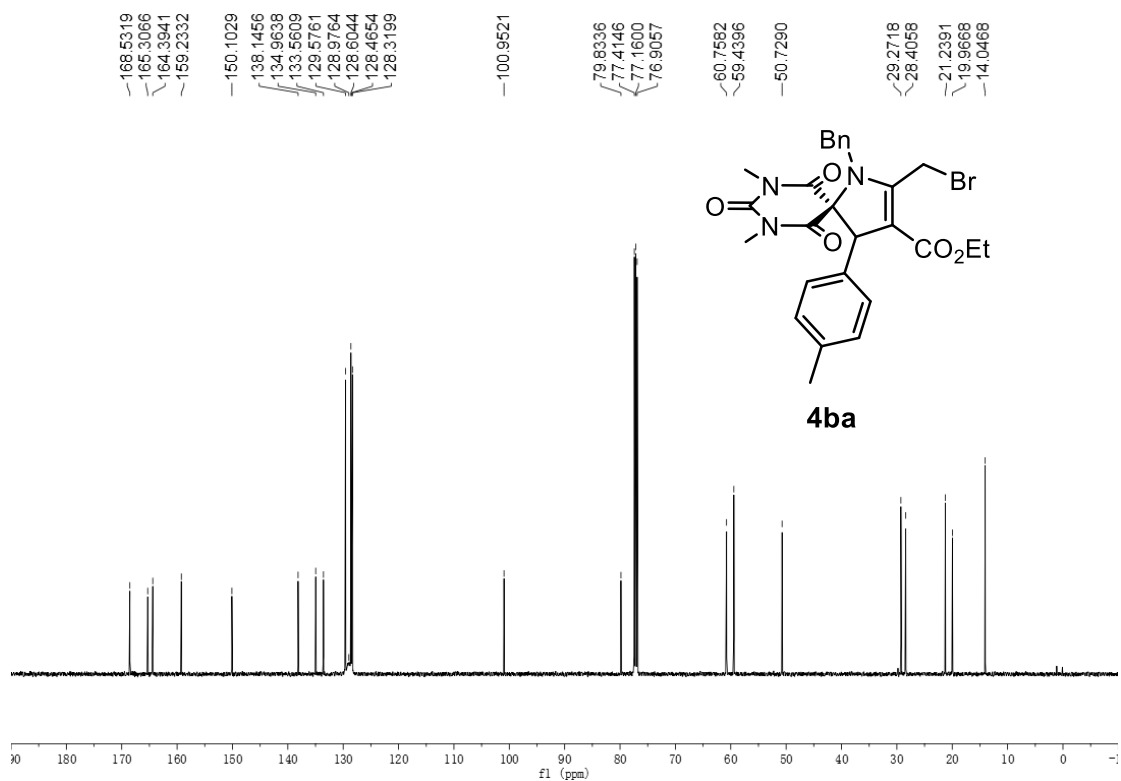

**Figure S58. <sup>13</sup>C NMR (125 MHz, CDCl<sub>3</sub>) of compound 4ba**

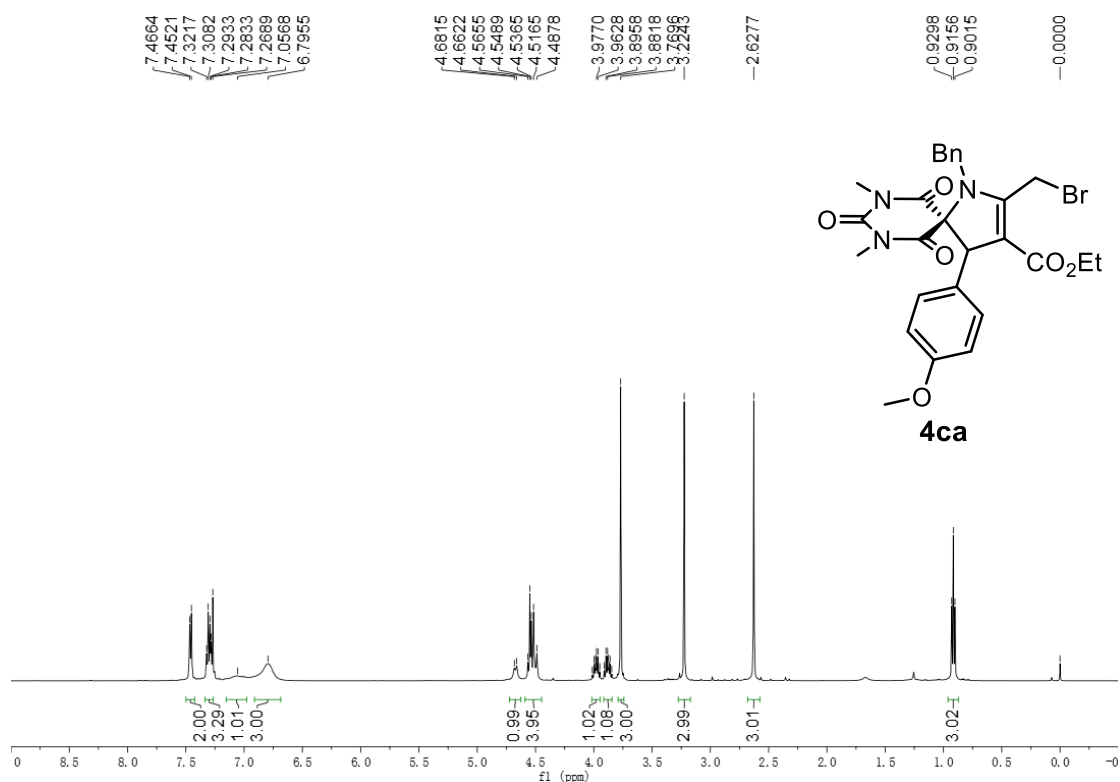

**Figure S59. <sup>1</sup>H NMR (500 MHz, CDCl<sub>3</sub>) of compound 4ca**

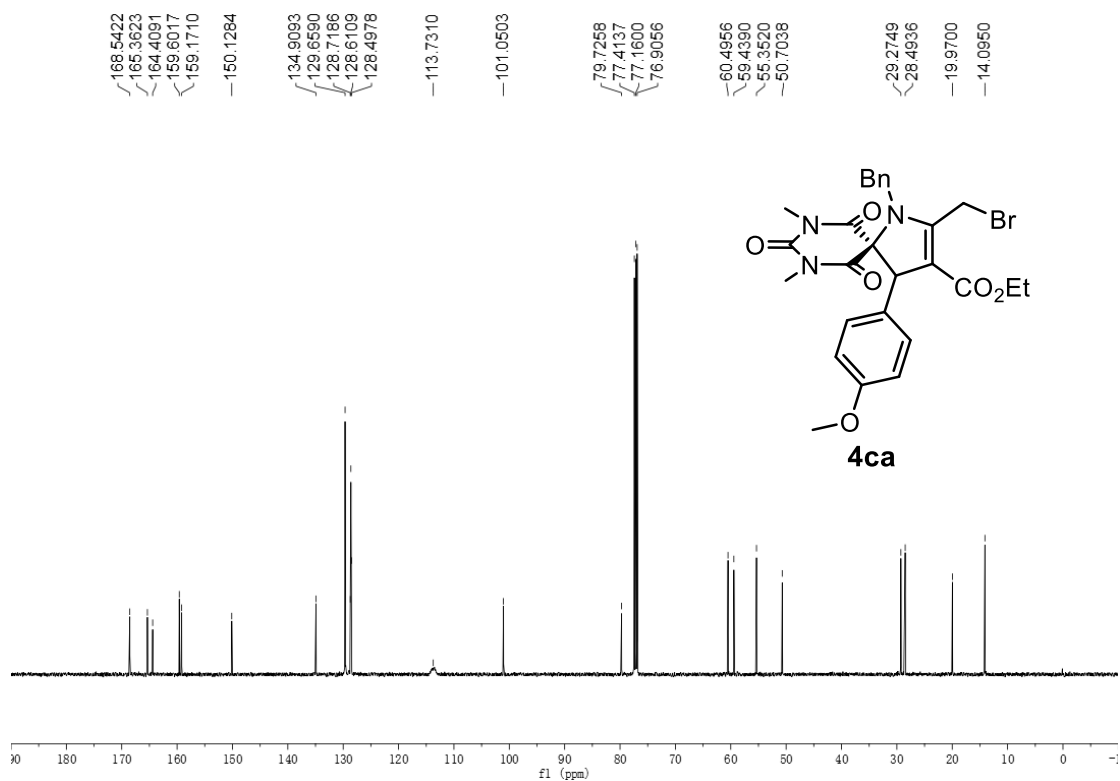

**Figure S60. <sup>13</sup>C NMR (125 MHz, CDCl<sub>3</sub>) of compound 4ca**

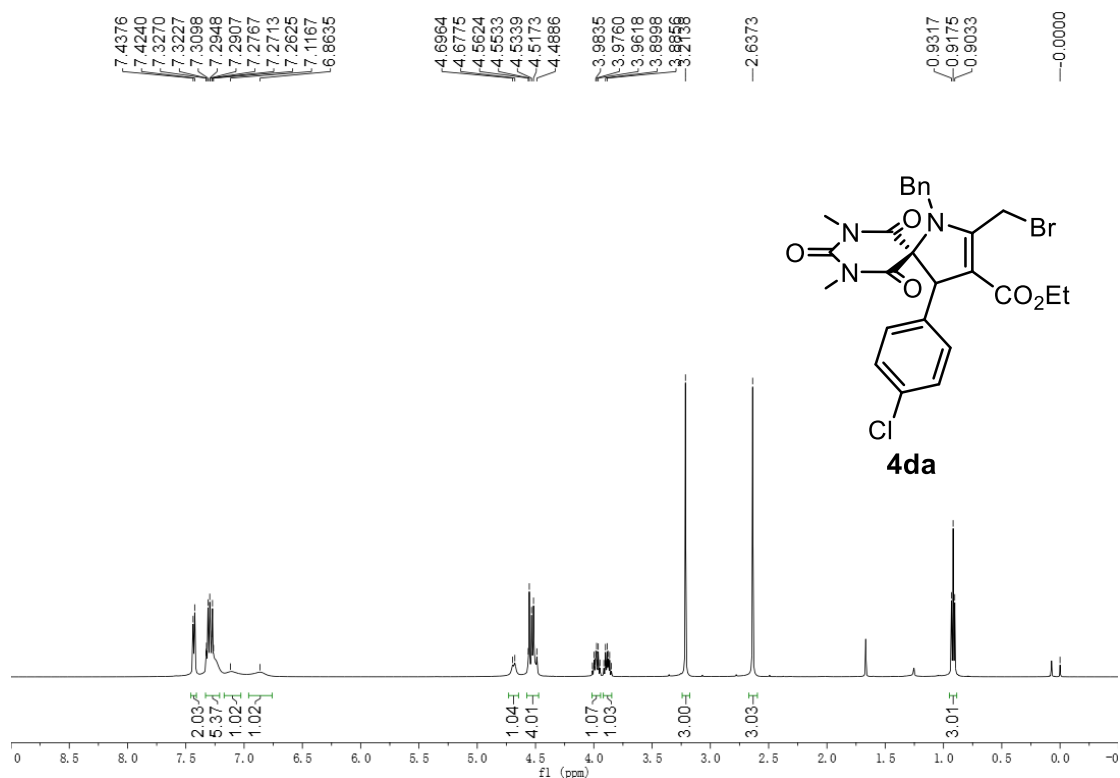

**Figure S61. <sup>1</sup>H NMR (500 MHz, CDCl<sub>3</sub>) of compound 4da**

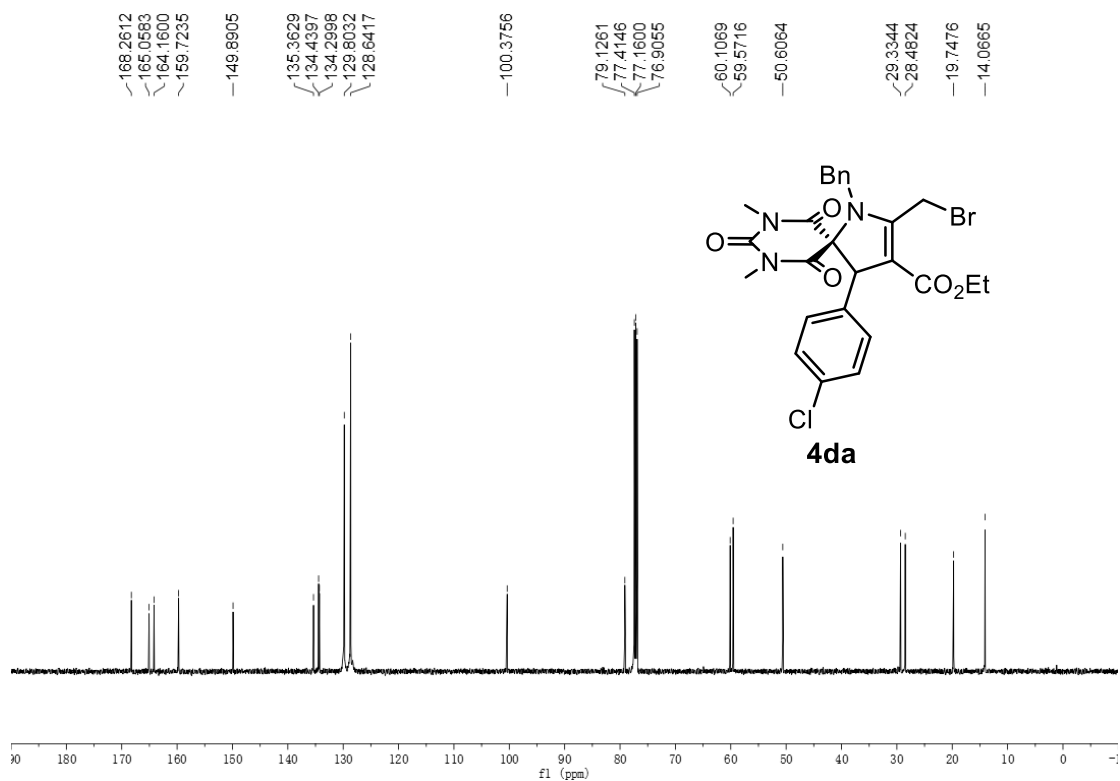

**Figure S62. <sup>13</sup>C NMR (125 MHz, CDCl<sub>3</sub>) of compound 4da**

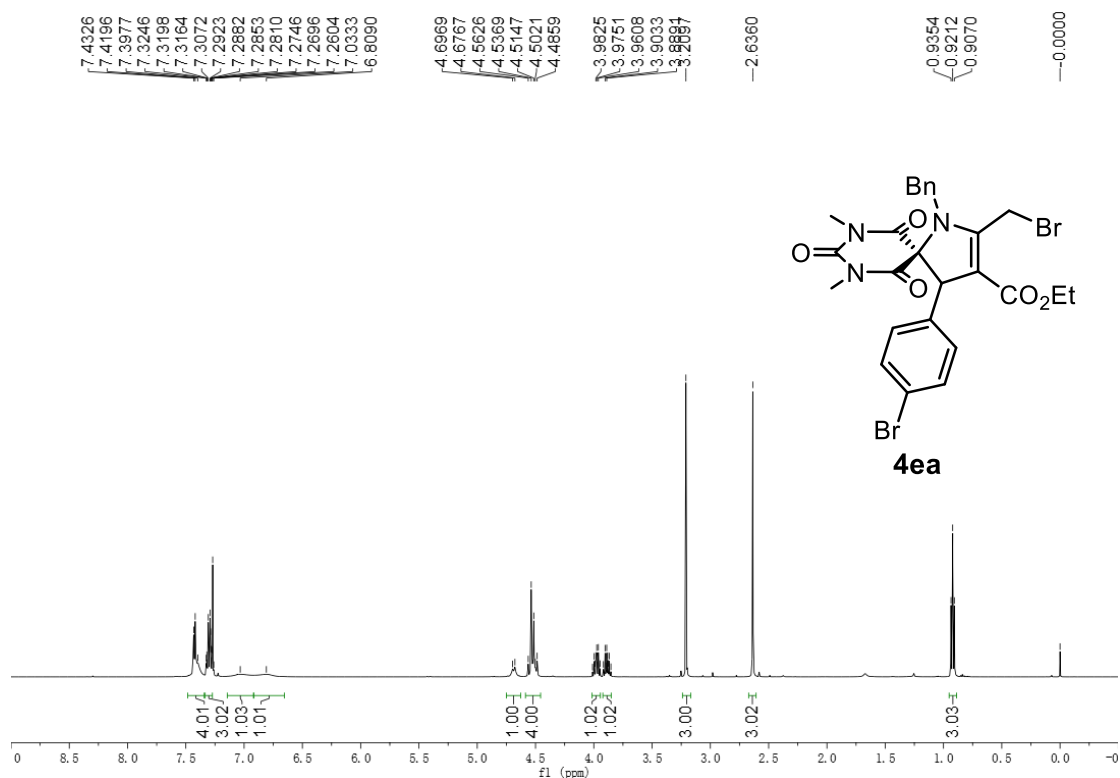

**Figure S63. <sup>1</sup>H NMR (500 MHz, CDCl<sub>3</sub>) of compound 4ea**

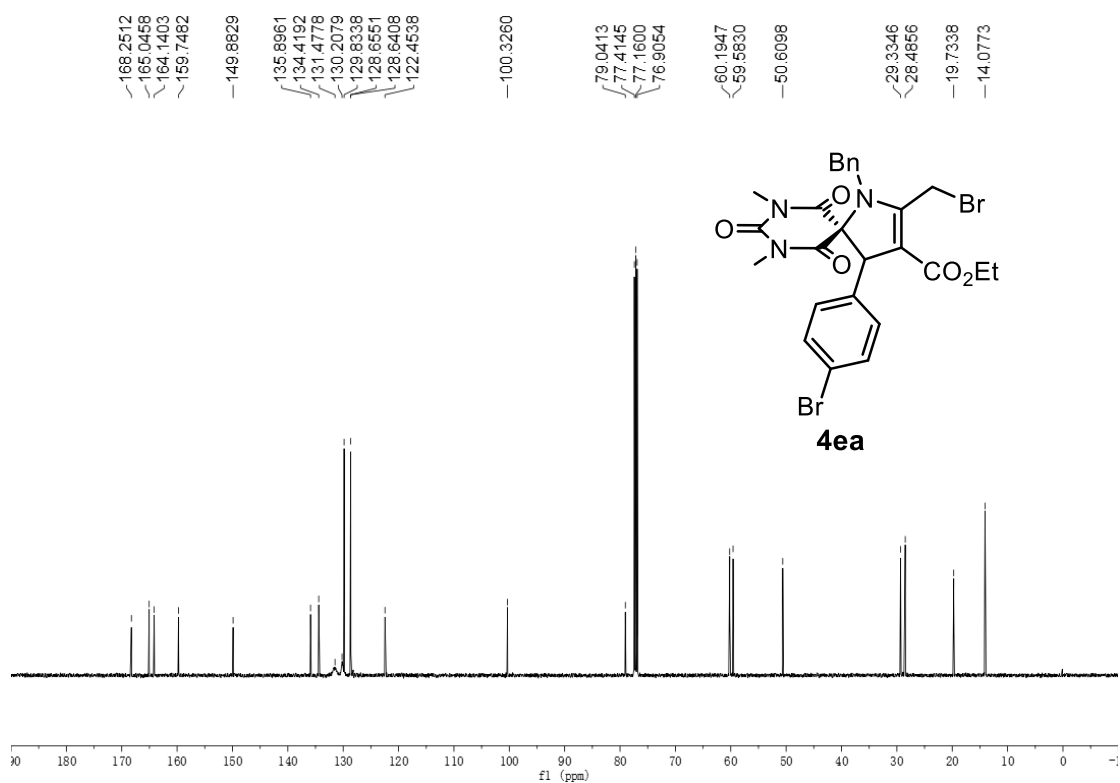

**Figure S64. <sup>13</sup>C NMR (125 MHz, CDCl<sub>3</sub>) of compound 4ea**

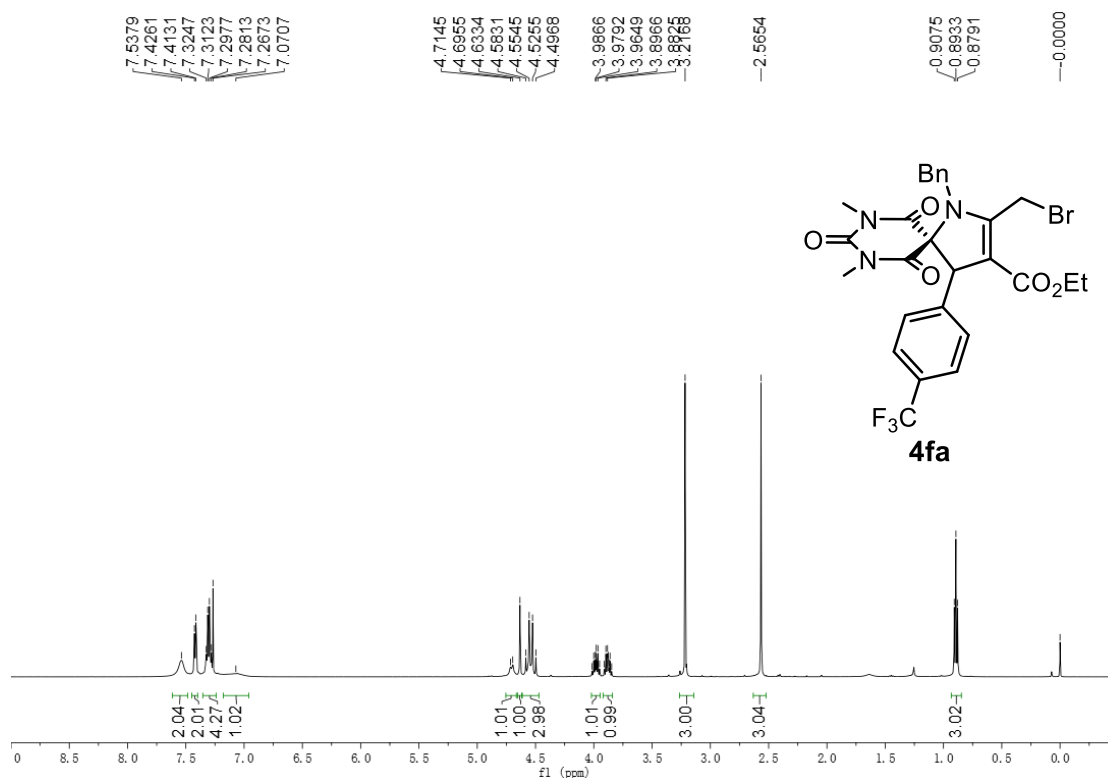

**Figure S65. <sup>1</sup>H NMR (500 MHz, CDCl<sub>3</sub>) of compound 4fa**

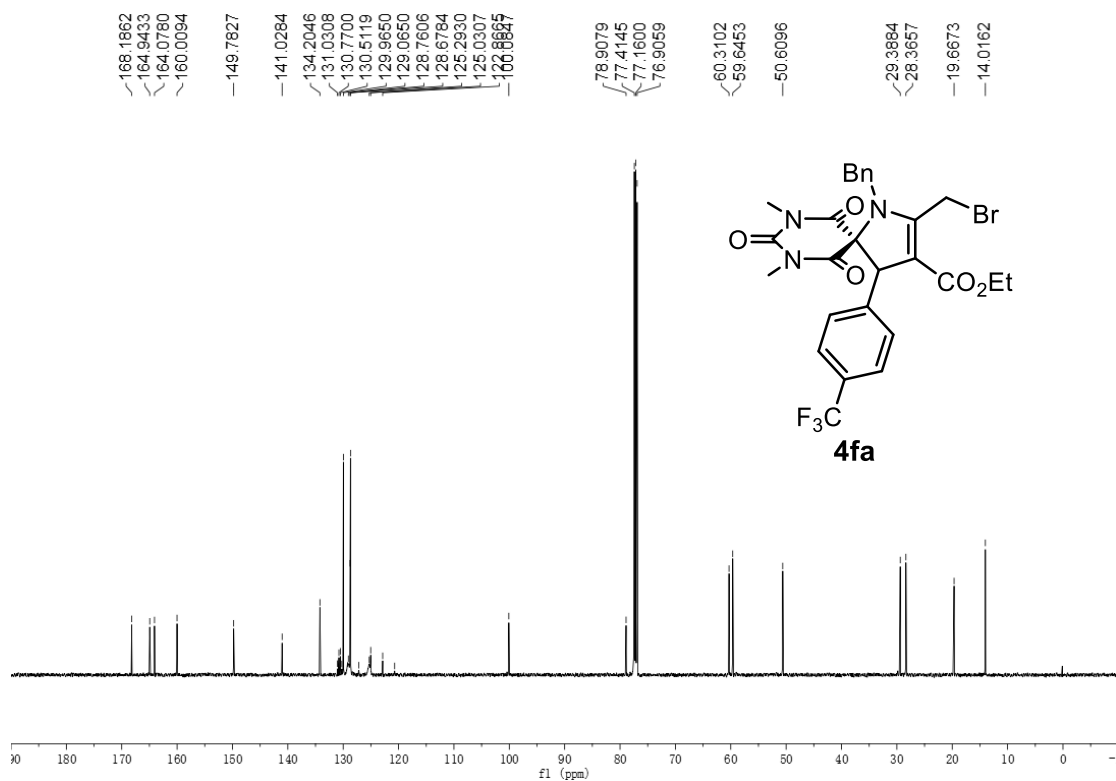

**Figure S66. <sup>13</sup>C NMR (125 MHz, CDCl<sub>3</sub>) of compound 4fa**

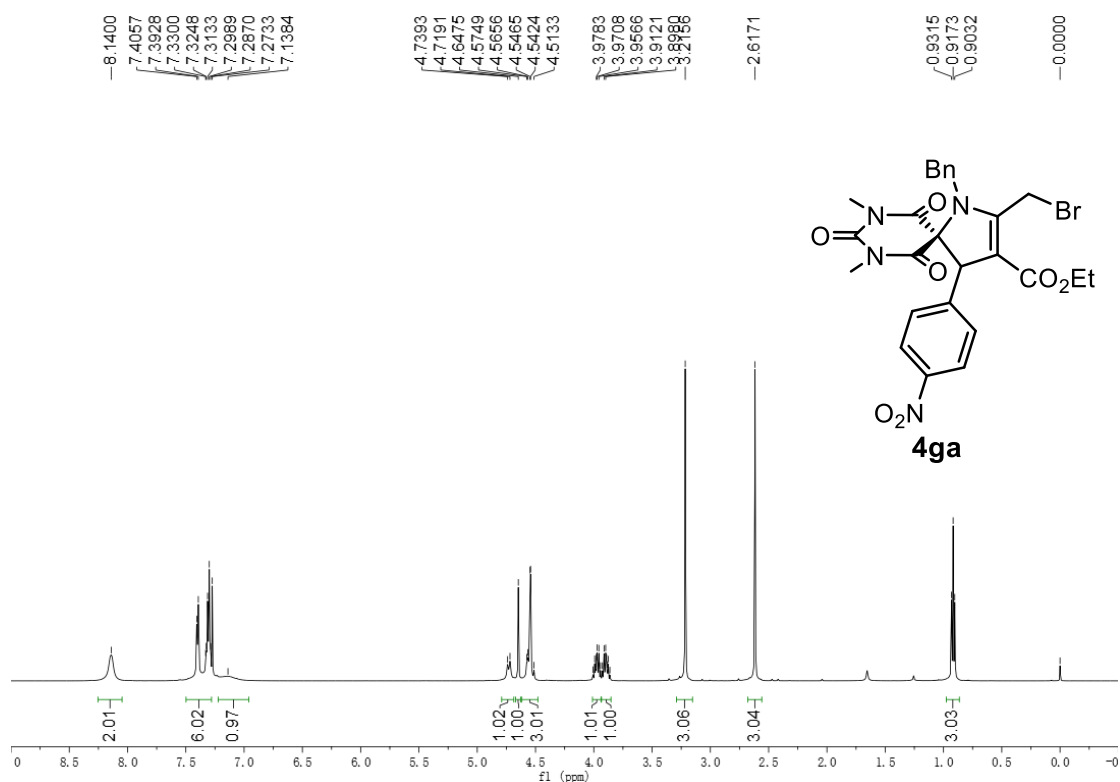

**Figure S67. <sup>1</sup>H NMR (500 MHz, CDCl<sub>3</sub>) of compound 4ga**

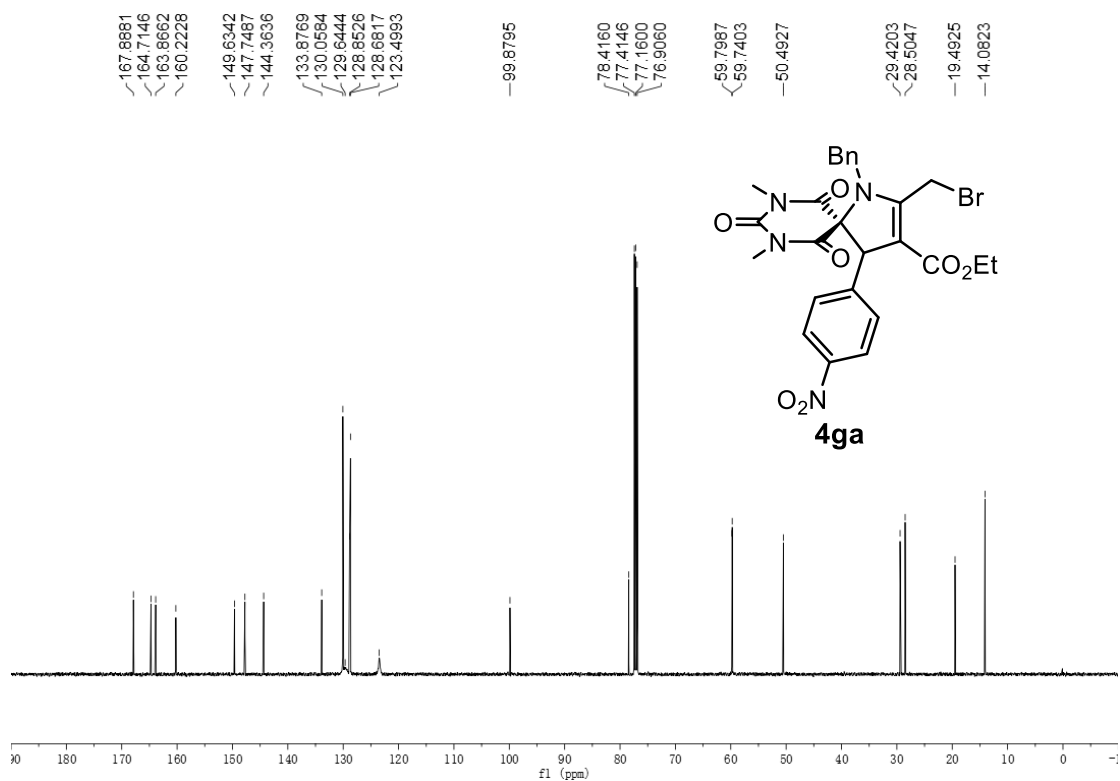

**Figure S68. <sup>13</sup>C NMR (125 MHz, CDCl<sub>3</sub>) of compound 4ga**

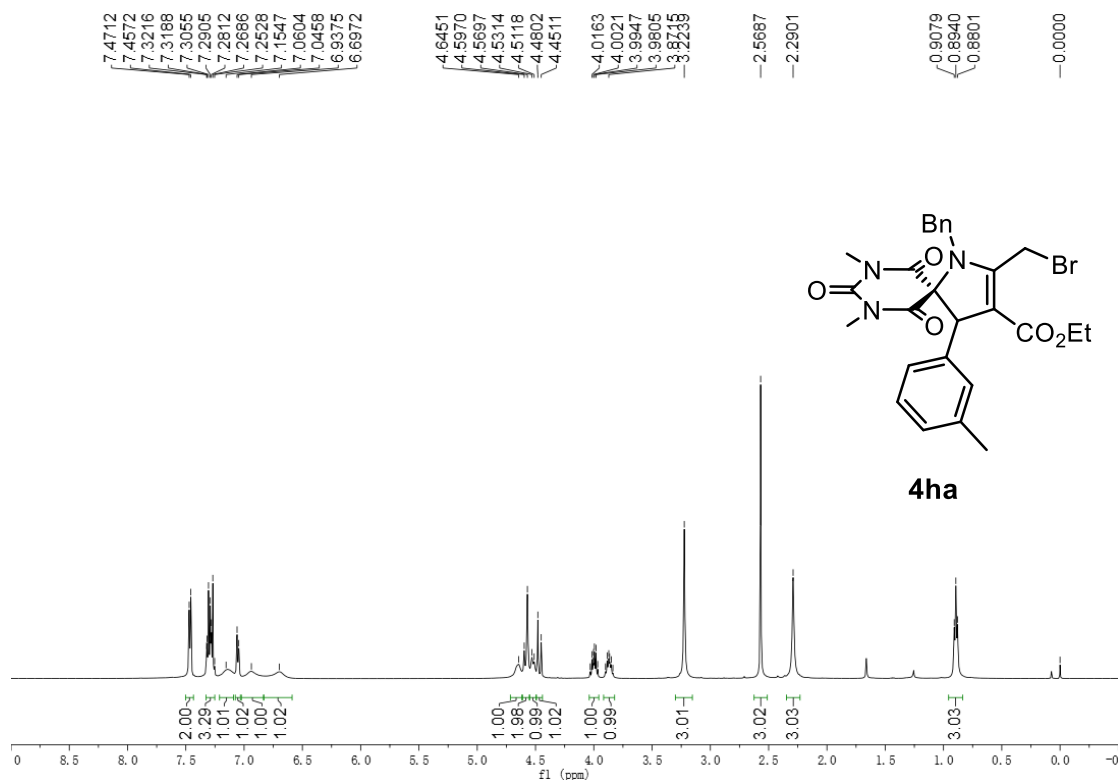

**Figure S69.** <sup>1</sup>H NMR (500 MHz, CDCl<sub>3</sub>) of compound 4ha

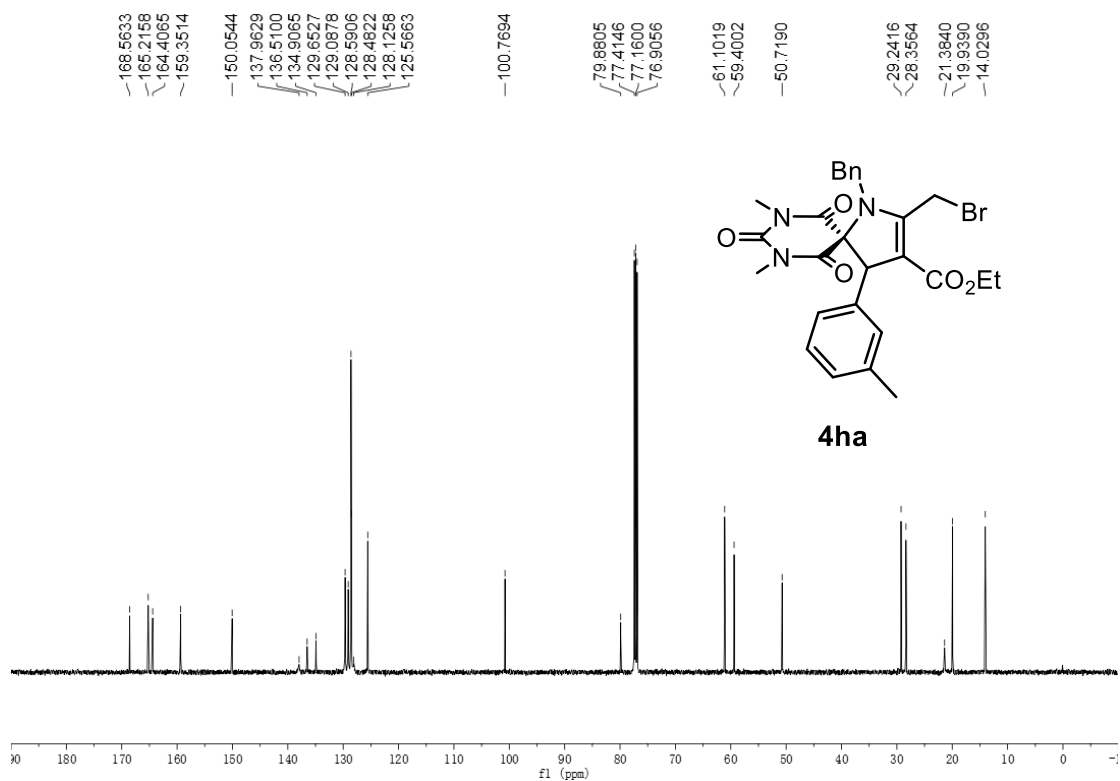

**Figure S70.** <sup>13</sup>C NMR (125 MHz, CDCl<sub>3</sub>) of compound 4ha

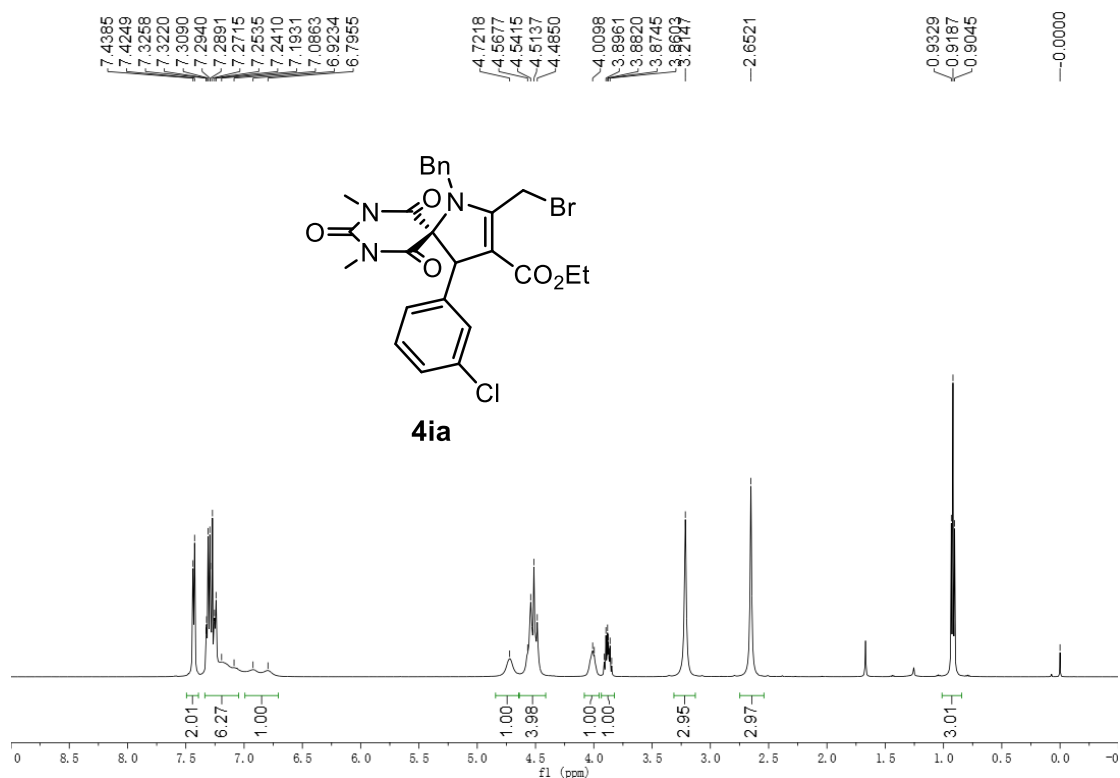

Figure S71. <sup>1</sup>H NMR (500 MHz, CDCl<sub>3</sub>) of compound 4ia

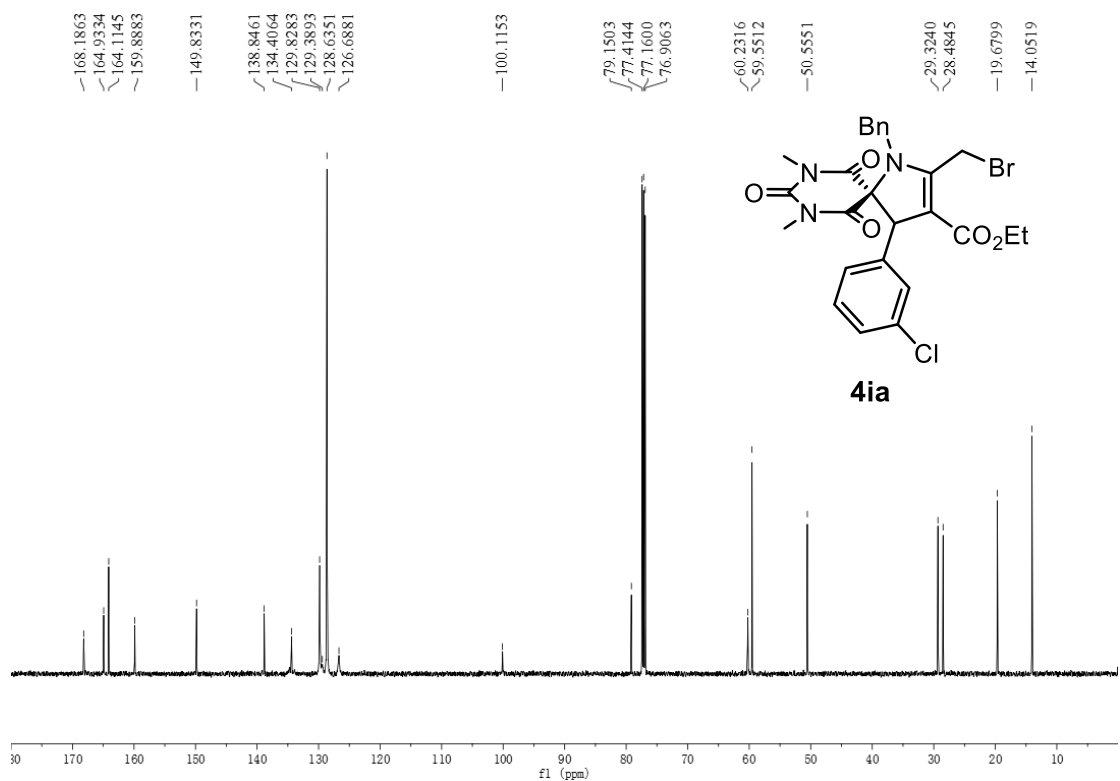

Figure S72. <sup>13</sup>C NMR (125 MHz, CDCl<sub>3</sub>) of compound 4ia

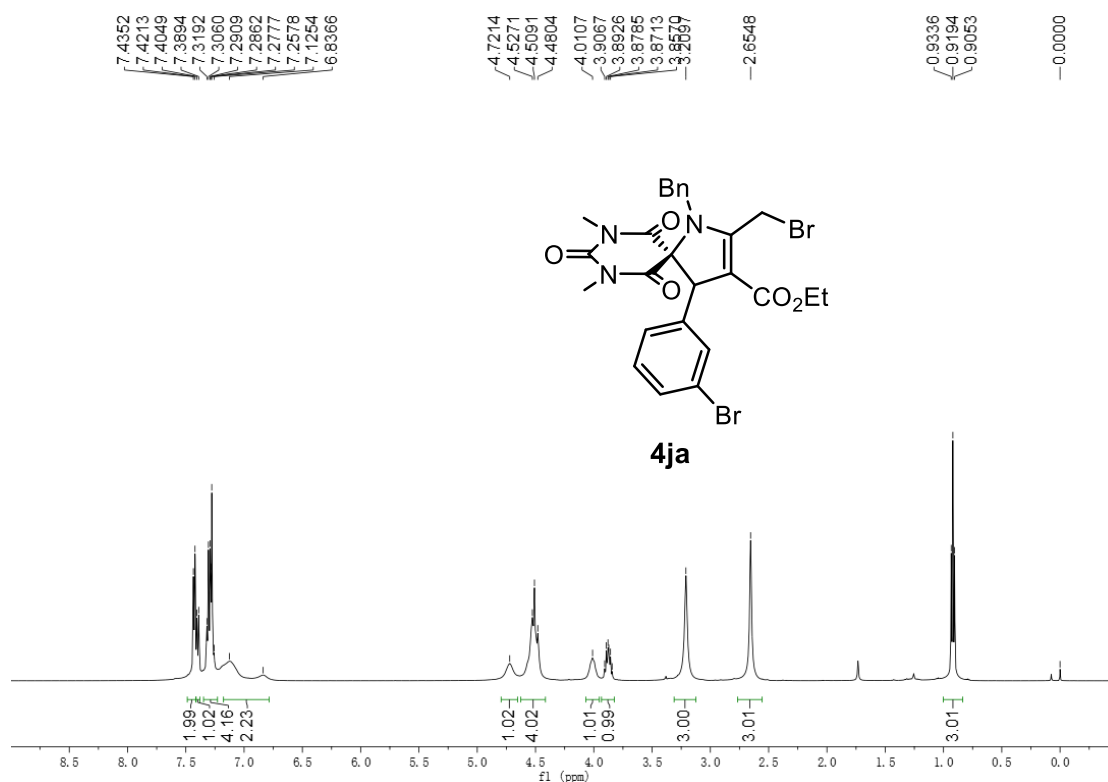

**Figure S73. <sup>1</sup>H NMR (500 MHz, CDCl<sub>3</sub>) of compound 4ja**

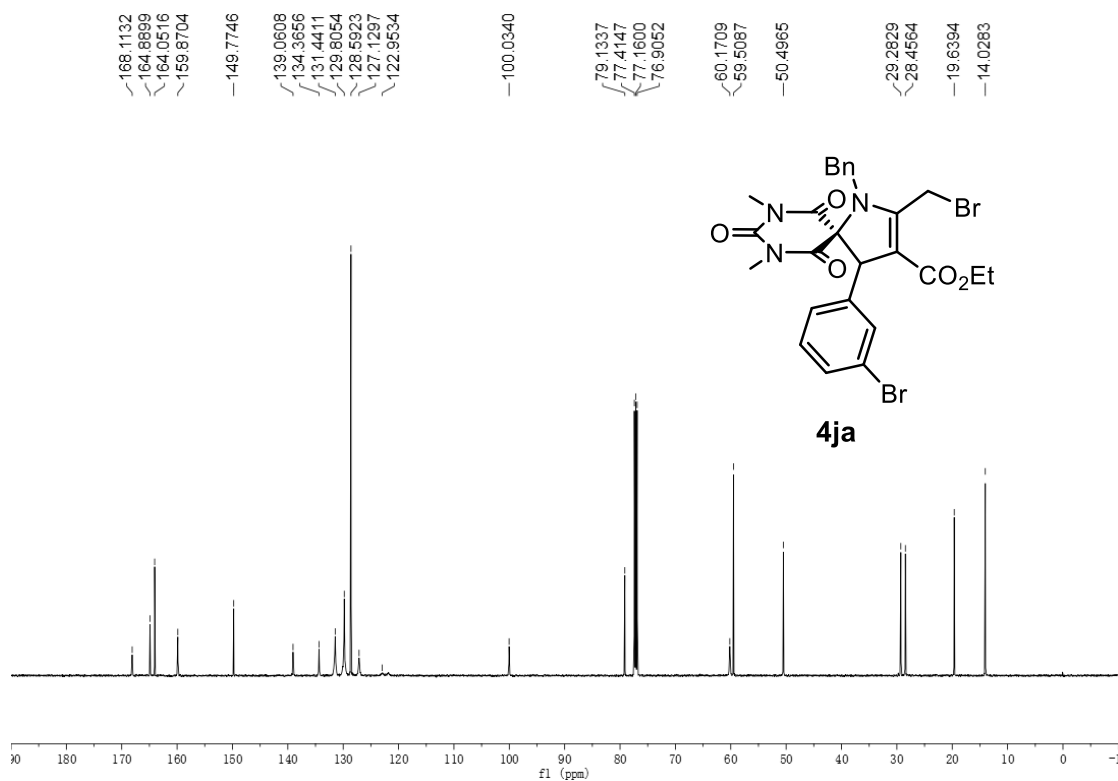

**Figure S74. <sup>13</sup>C NMR (125 MHz, CDCl<sub>3</sub>) of compound 4ja**

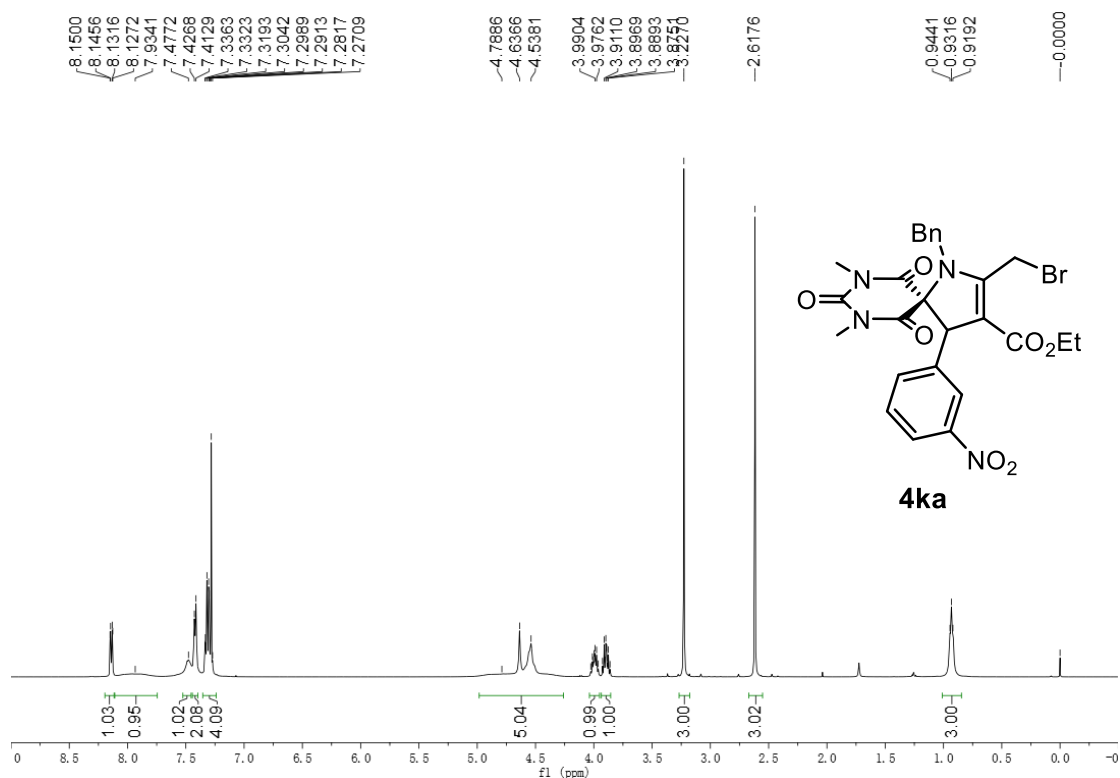

Figure S75. <sup>1</sup>H NMR (500 MHz, CDCl<sub>3</sub>) of compound 4ka

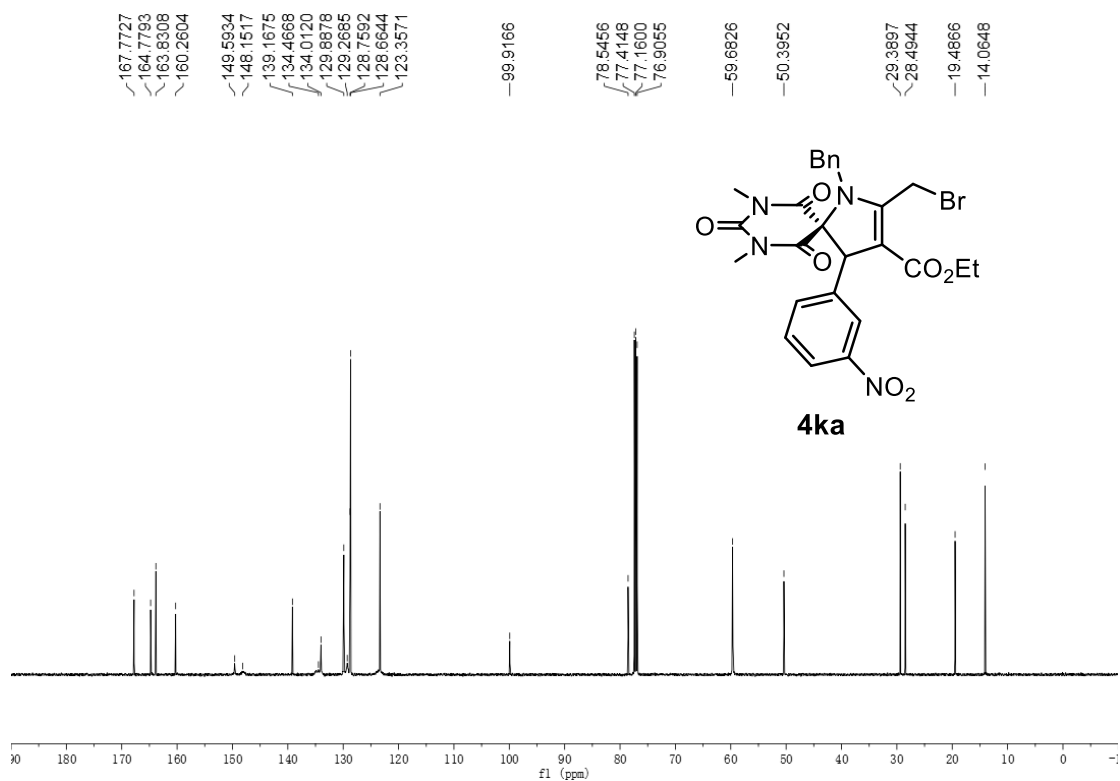

Figure S76. <sup>13</sup>C NMR (125 MHz, CDCl<sub>3</sub>) of compound 4ka

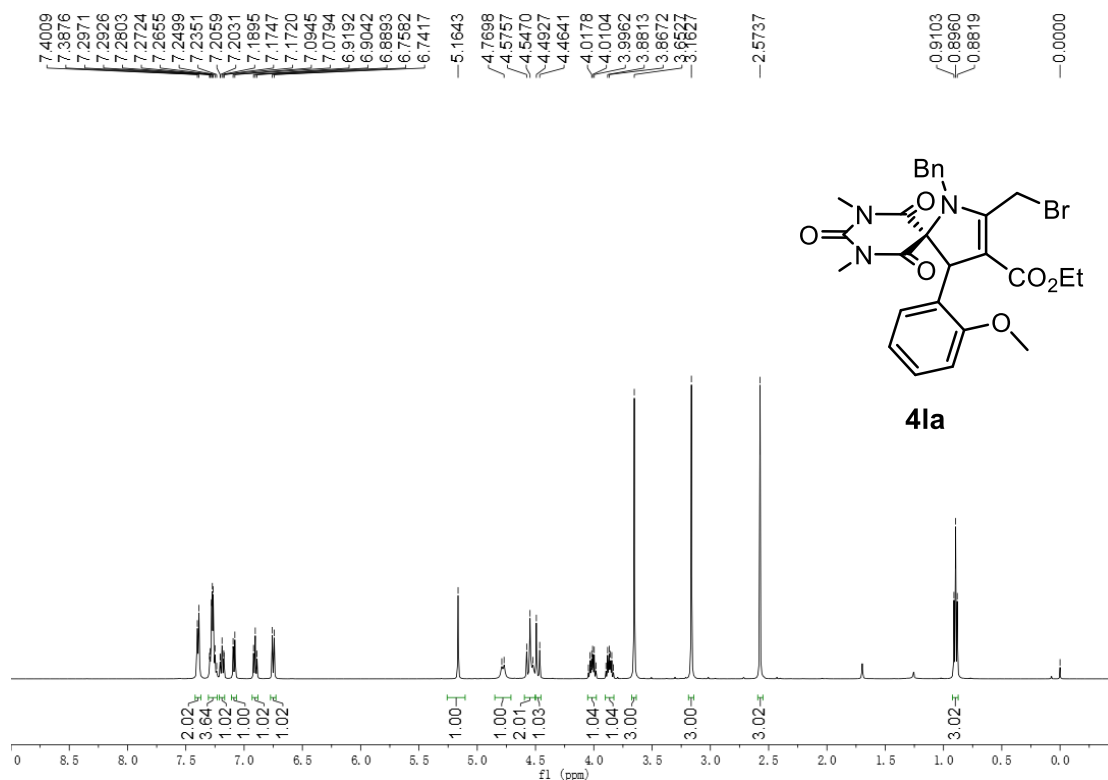

**Figure S77. <sup>1</sup>H NMR (500 MHz, CDCl<sub>3</sub>) of compound 4la**

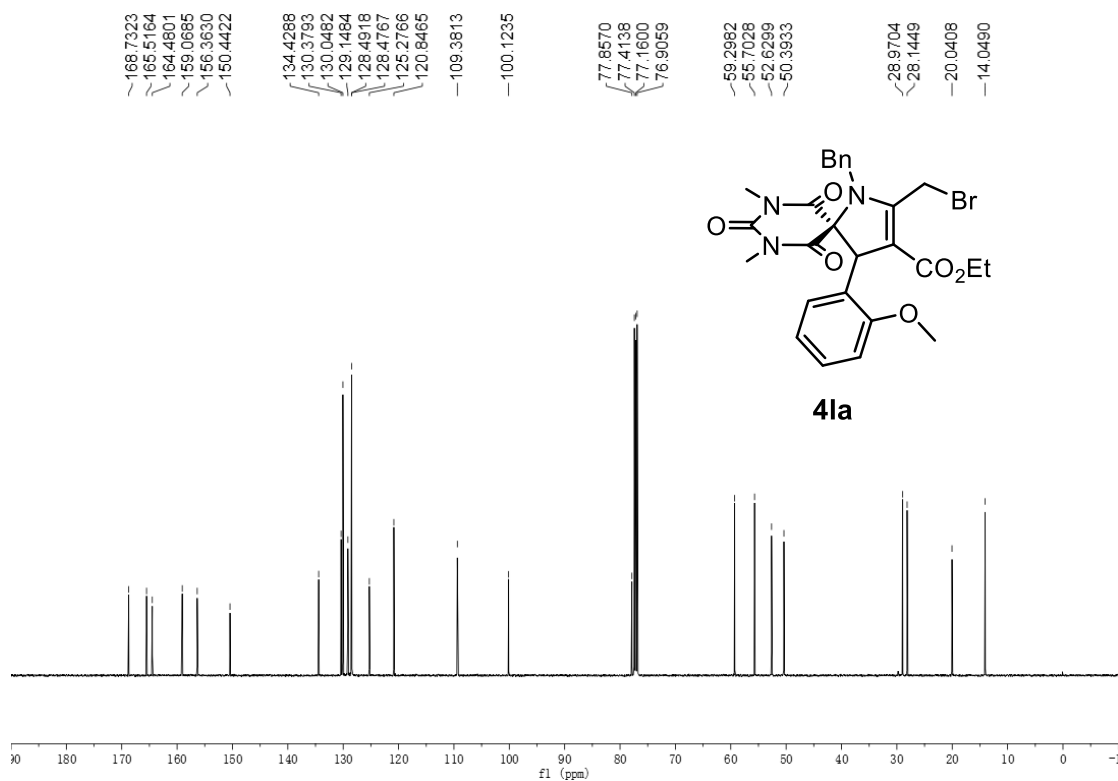

**Figure S78. <sup>13</sup>C NMR (125 MHz, CDCl<sub>3</sub>) of compound 4la**

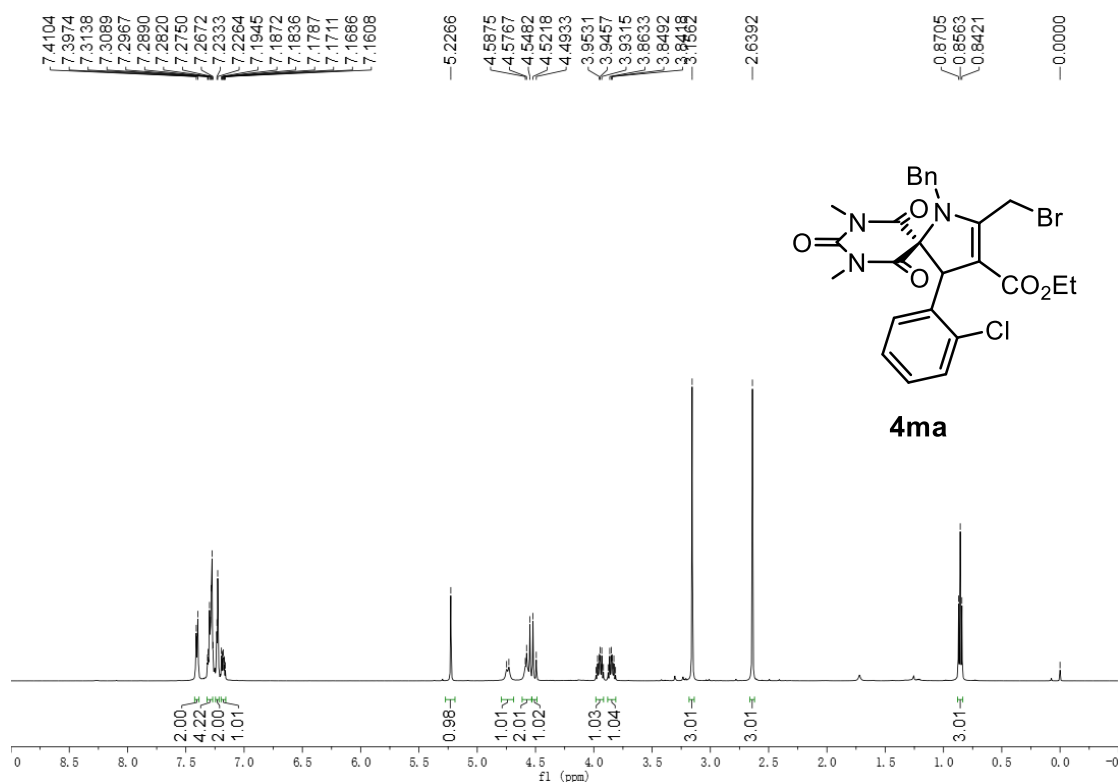

Figure S79. <sup>1</sup>H NMR (500 MHz, CDCl<sub>3</sub>) of compound 4ma

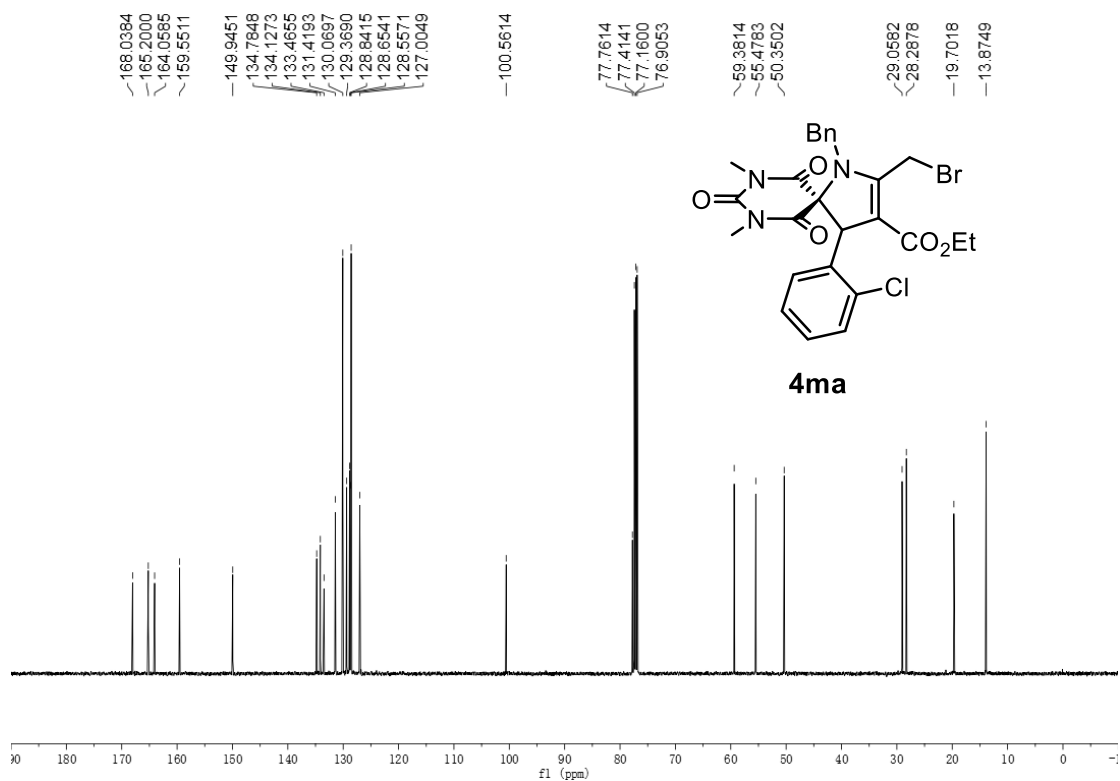

Figure S80. <sup>13</sup>C NMR (125 MHz, CDCl<sub>3</sub>) of compound 4ma

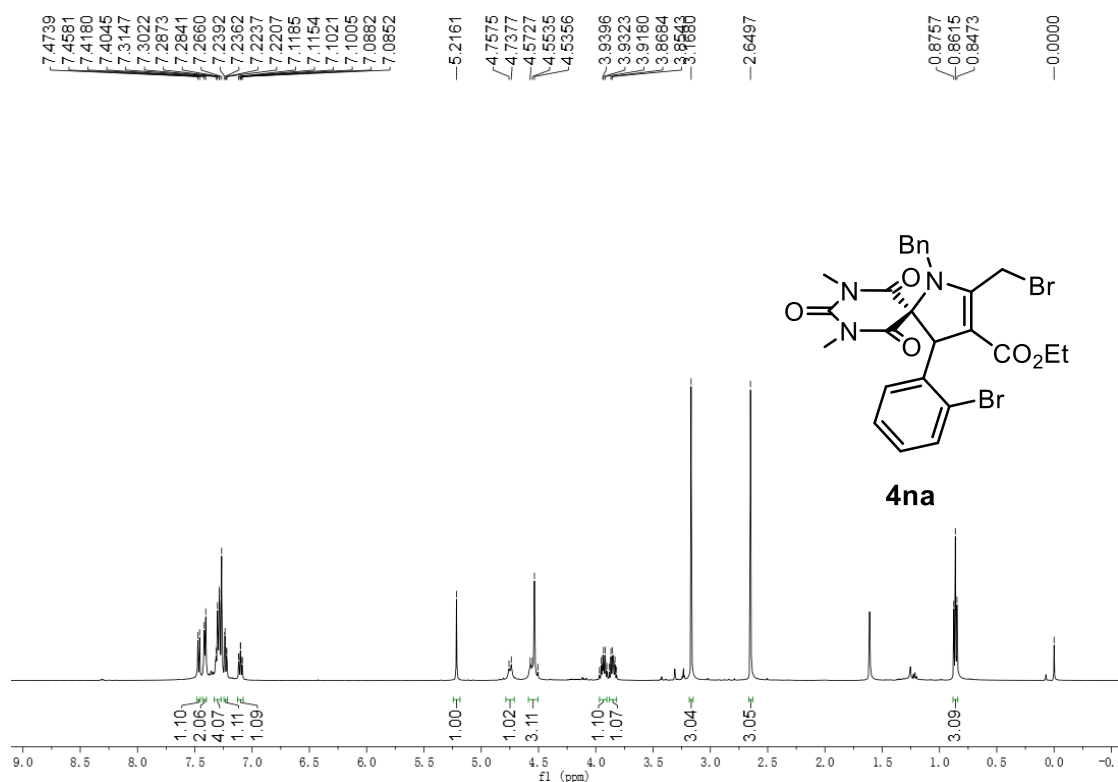

Figure S81. <sup>1</sup>H NMR (500 MHz, CDCl<sub>3</sub>) of compound 4na

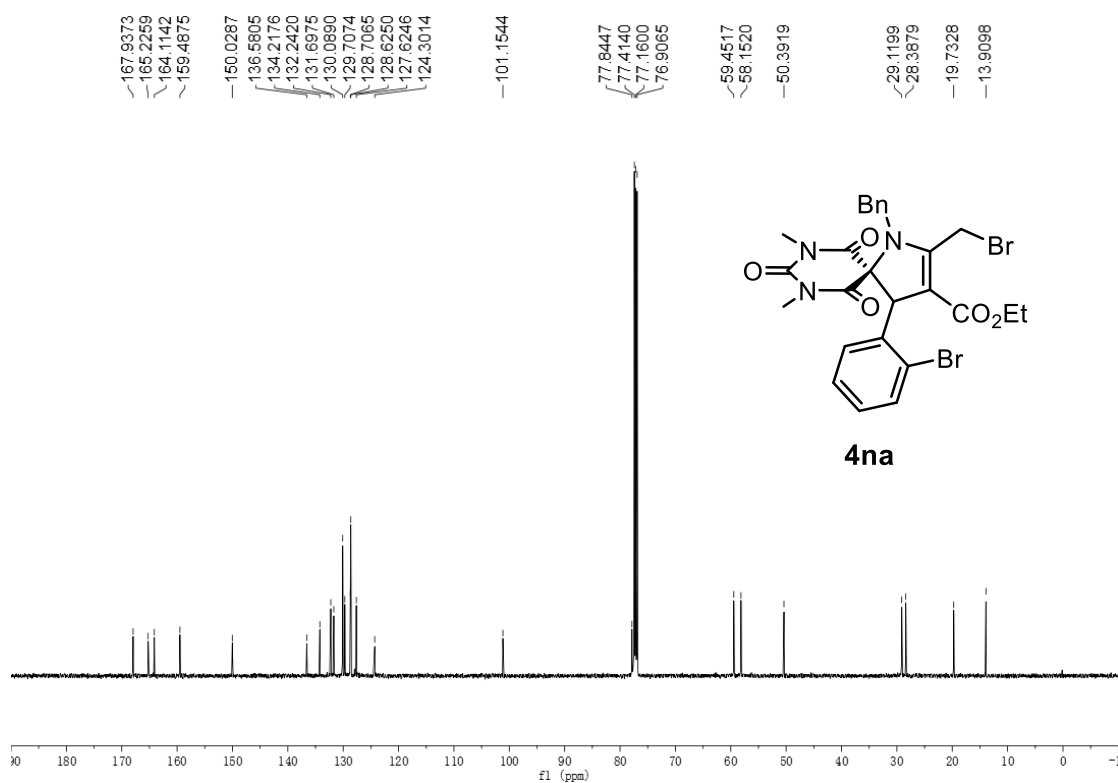

Figure S82. <sup>13</sup>C NMR (125 MHz, CDCl<sub>3</sub>) of compound 4na

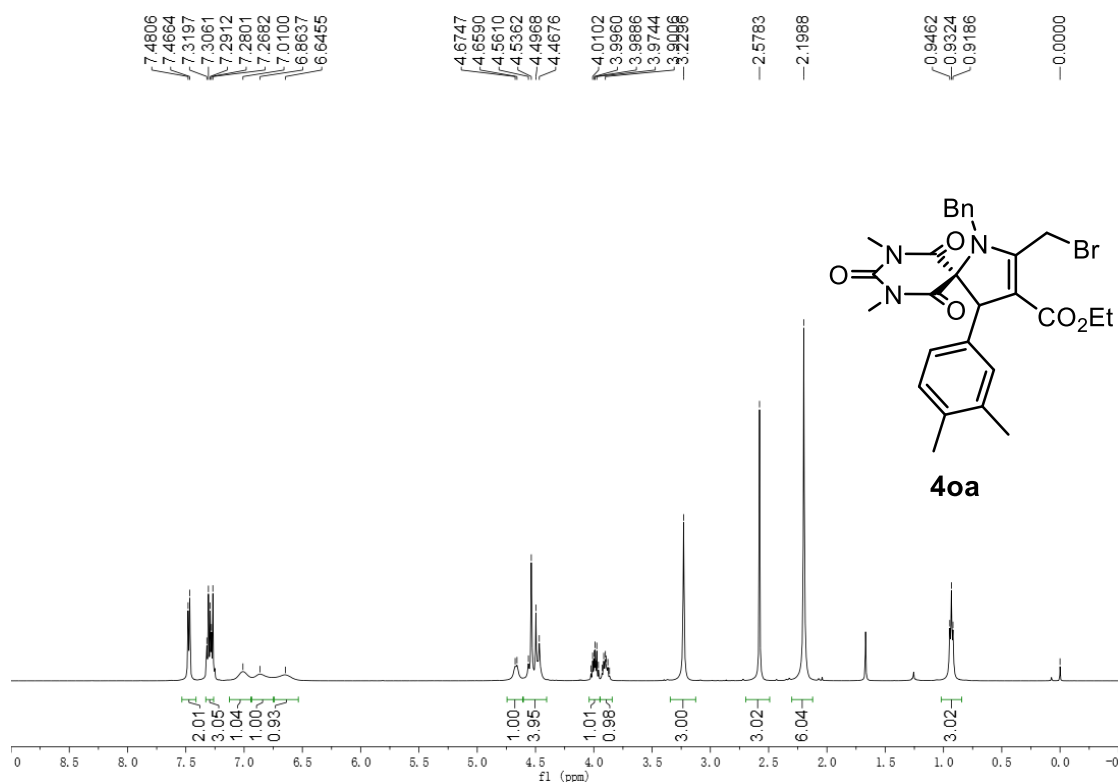

Figure S83. <sup>1</sup>H NMR (500 MHz, CDCl<sub>3</sub>) of compound 40a

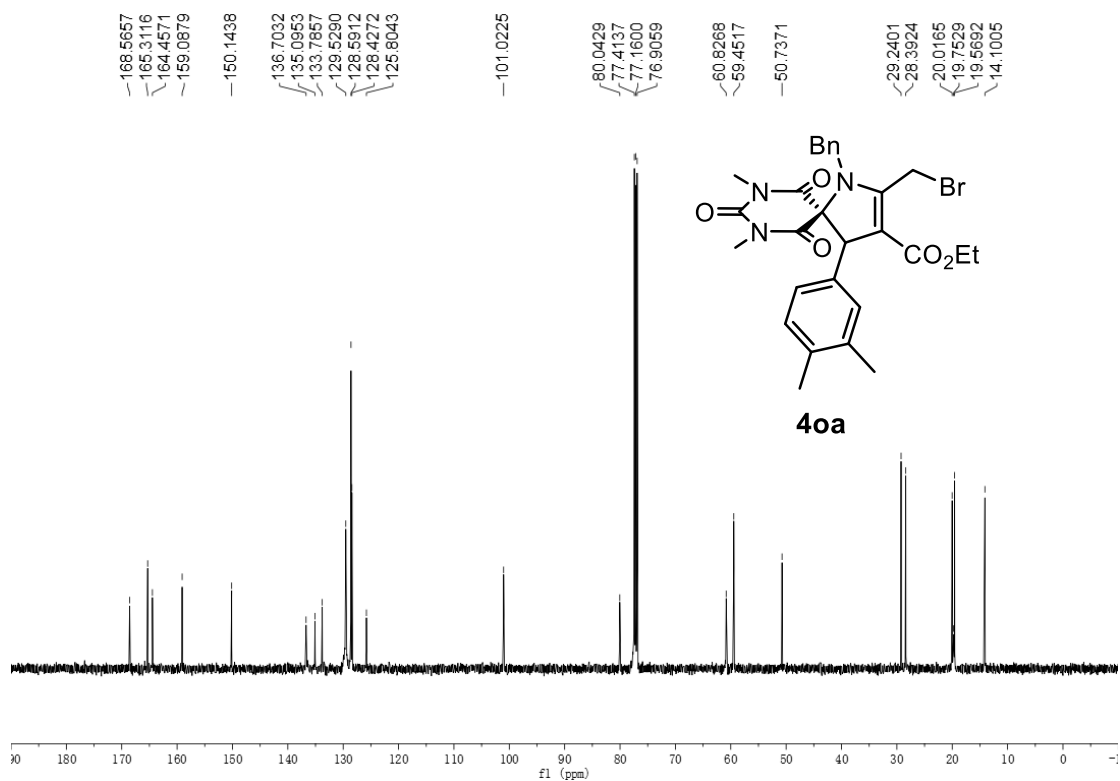

Figure S84. <sup>13</sup>C NMR (125 MHz, CDCl<sub>3</sub>) of compound 40a

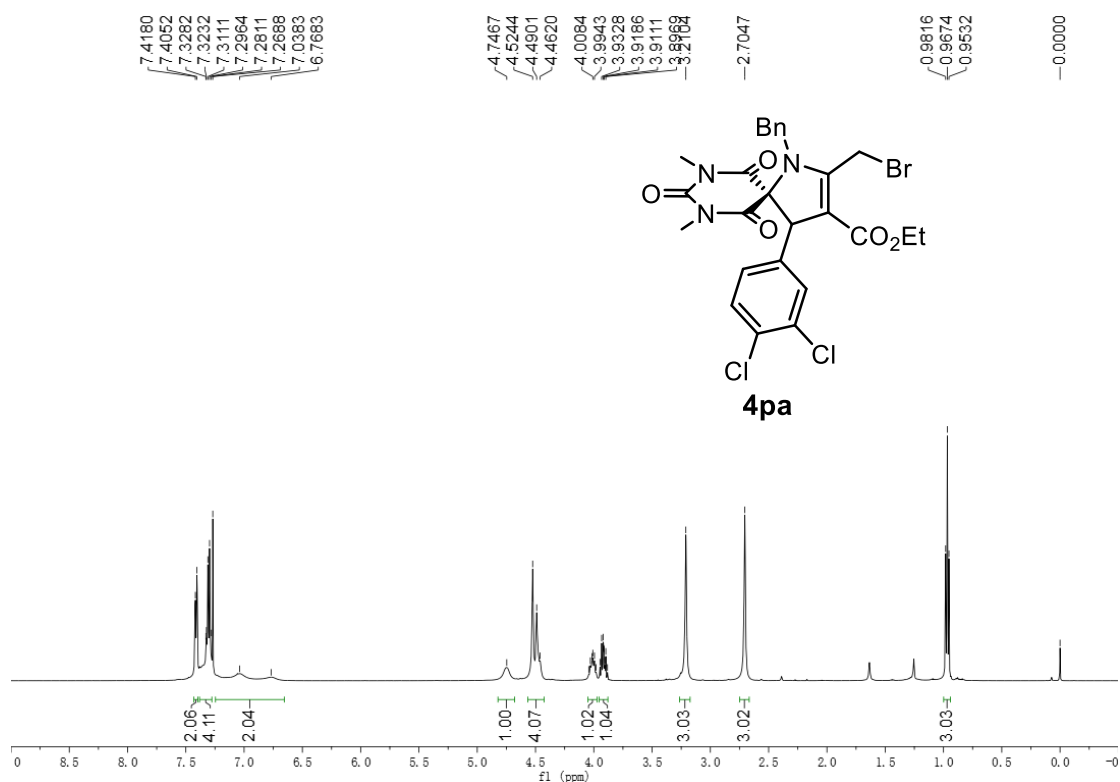

**Figure S85. <sup>1</sup>H NMR (500 MHz, CDCl<sub>3</sub>) of compound 4pa**

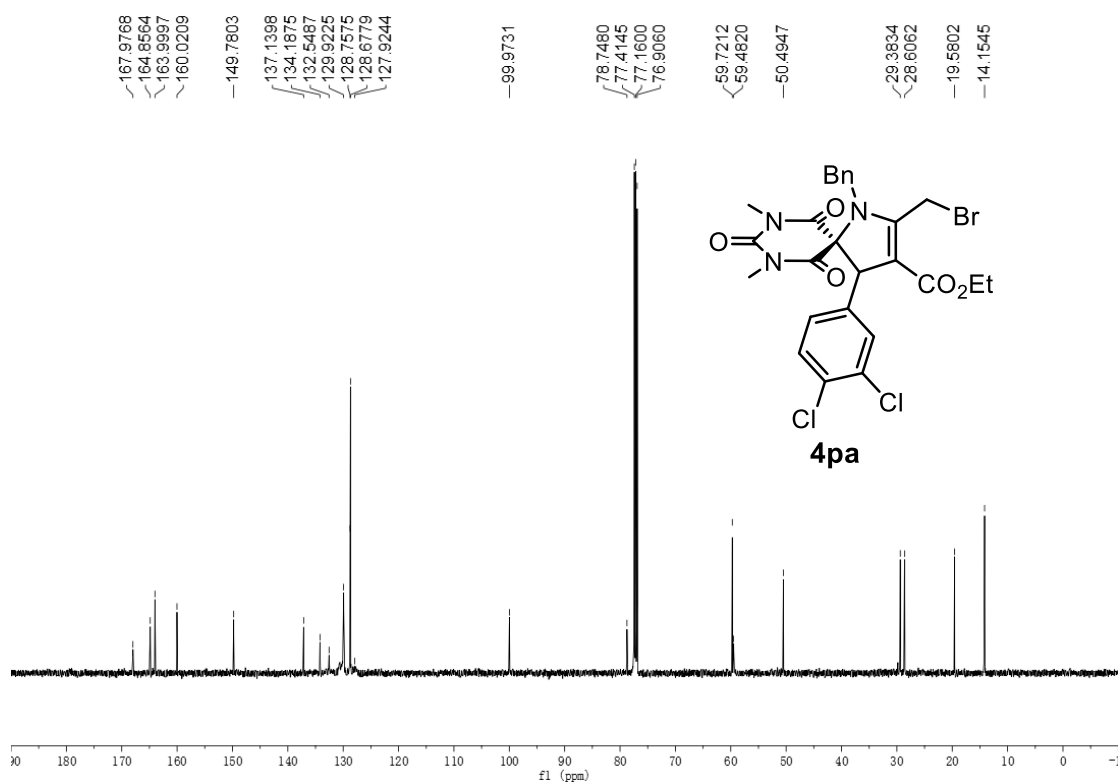

**Figure S86. <sup>13</sup>C NMR (125 MHz, CDCl<sub>3</sub>) of compound 4pa**

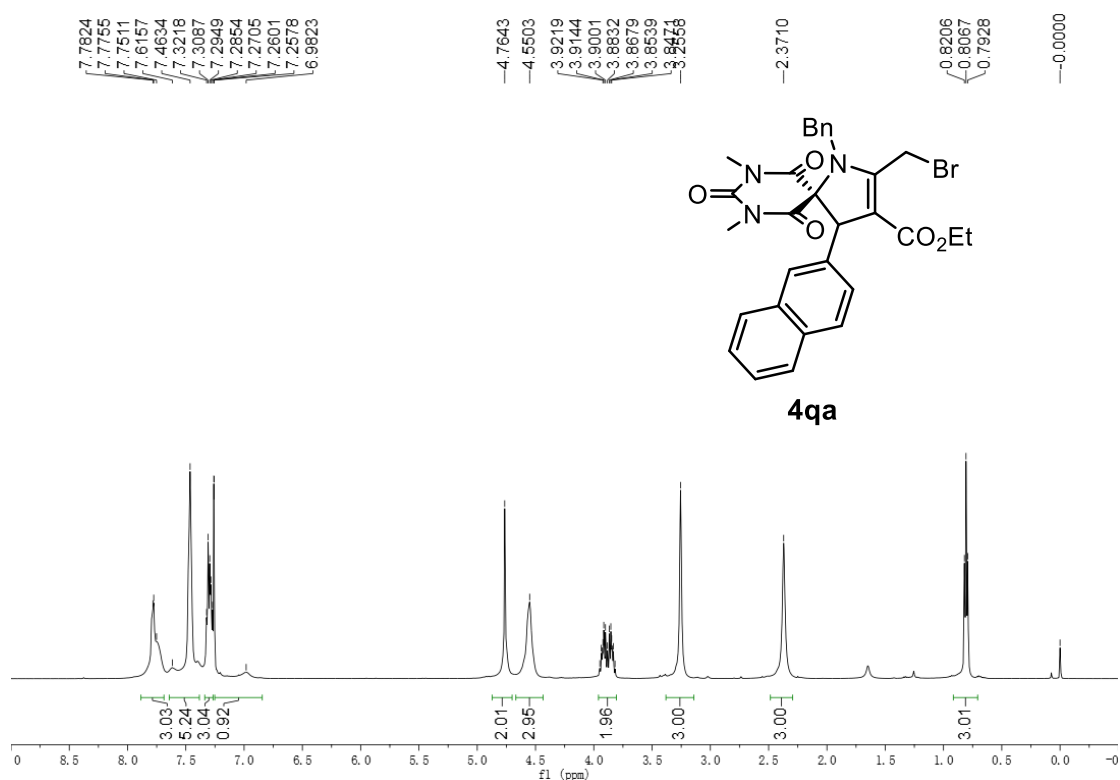

**Figure S87. <sup>1</sup>H NMR (500 MHz, CDCl<sub>3</sub>) of compound 4qa**

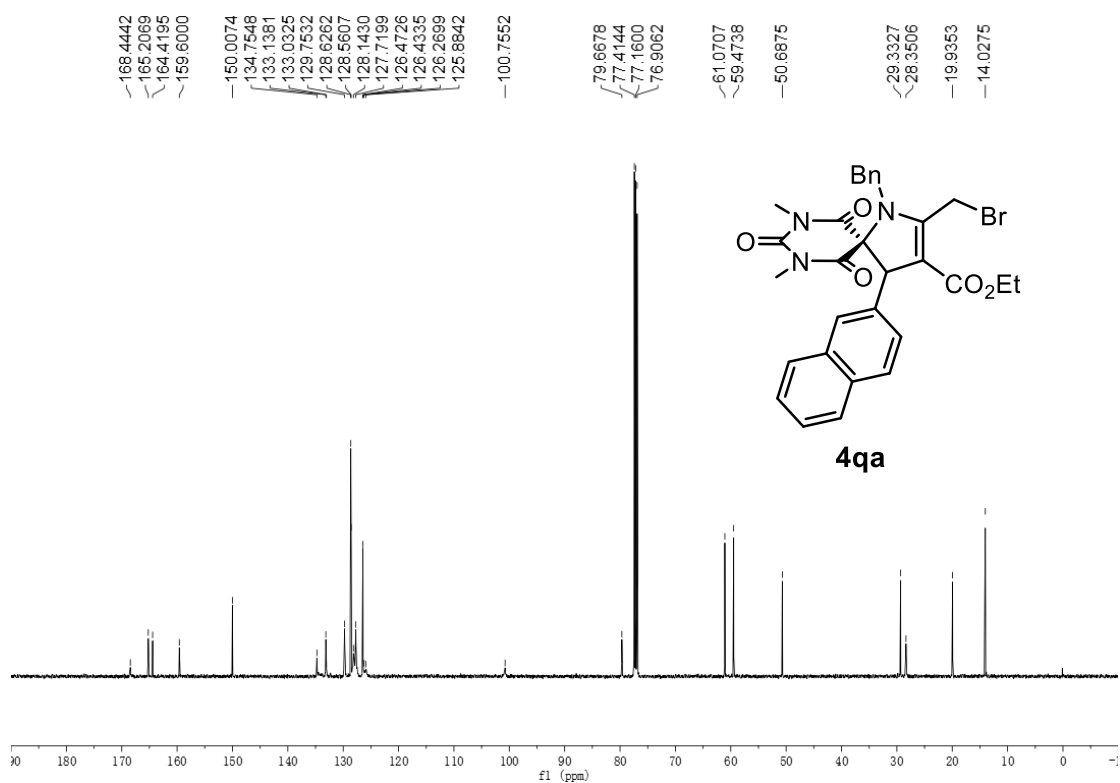

**Figure S88. <sup>13</sup>C NMR (125 MHz, CDCl<sub>3</sub>) of compound 4qa**

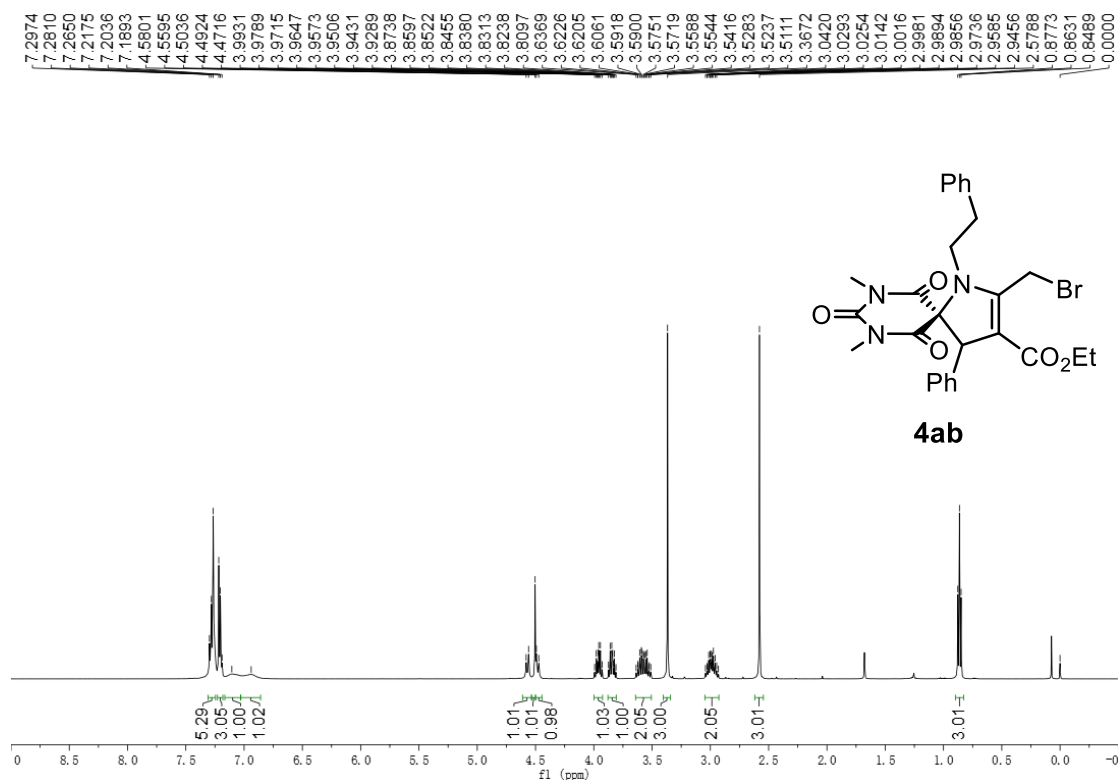

Figure S89. <sup>1</sup>H NMR (500 MHz, CDCl<sub>3</sub>) of compound **4ab**

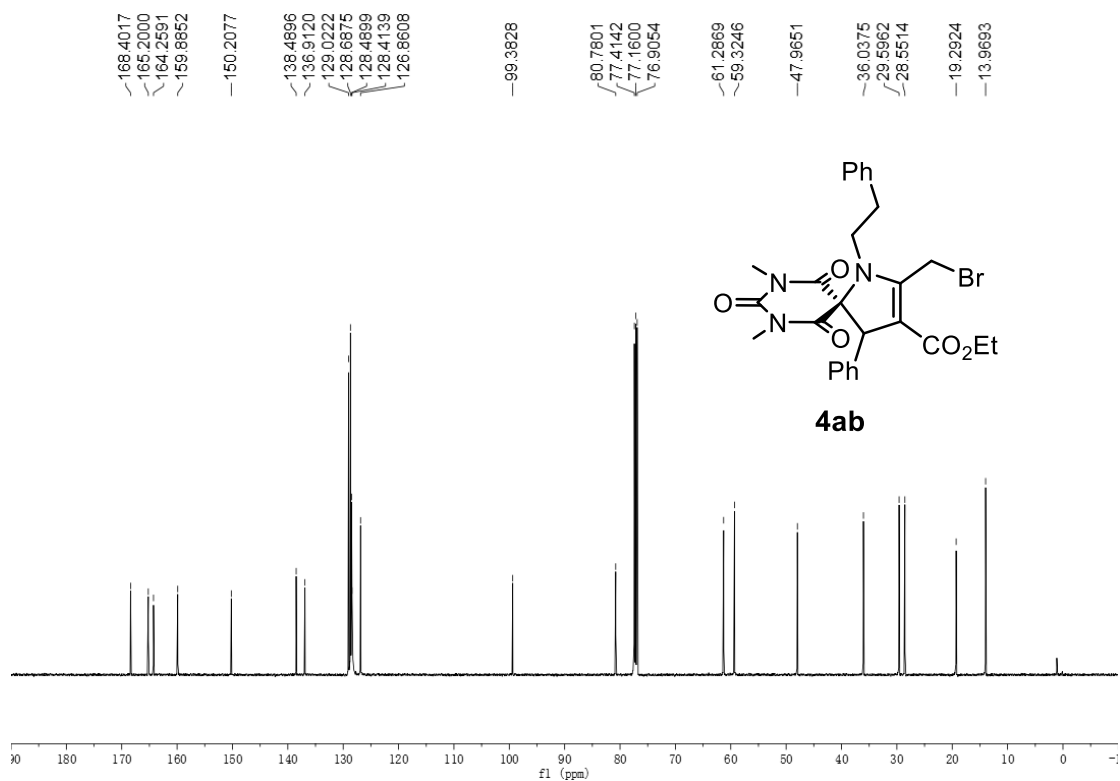

Figure S90. <sup>13</sup>C NMR (125 MHz, CDCl<sub>3</sub>) of compound **4ab**

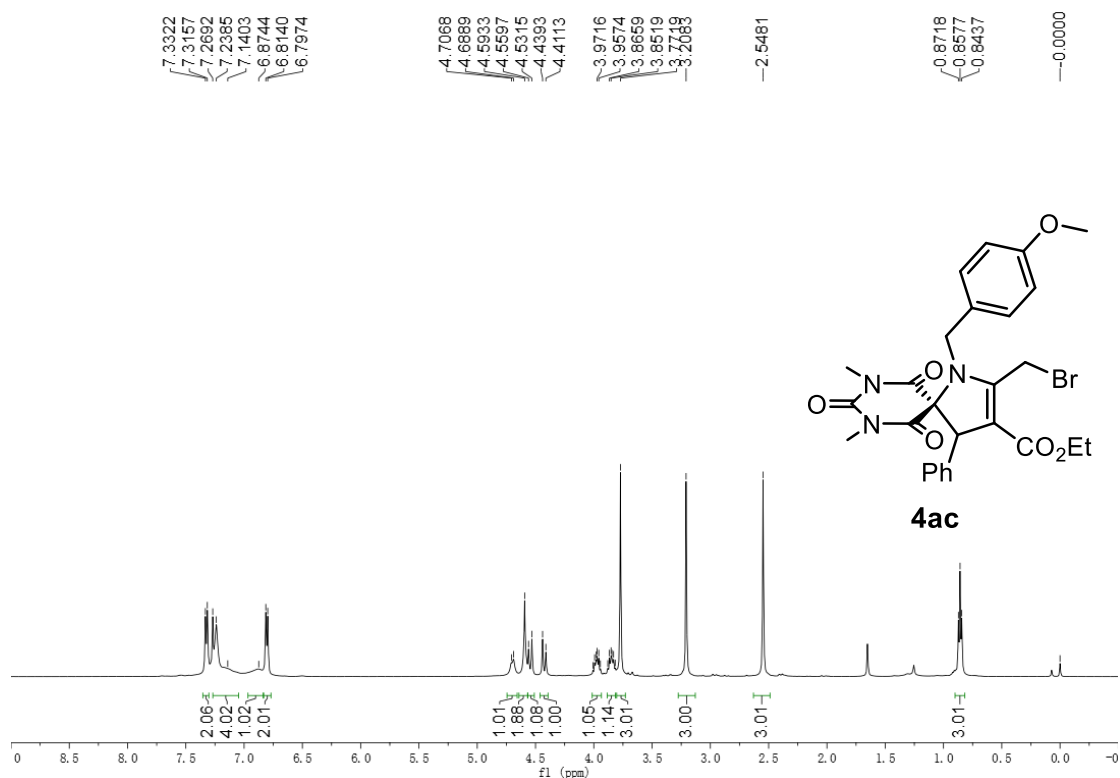

Figure S91. <sup>1</sup>H NMR (500 MHz, CDCl<sub>3</sub>) of compound 4ac

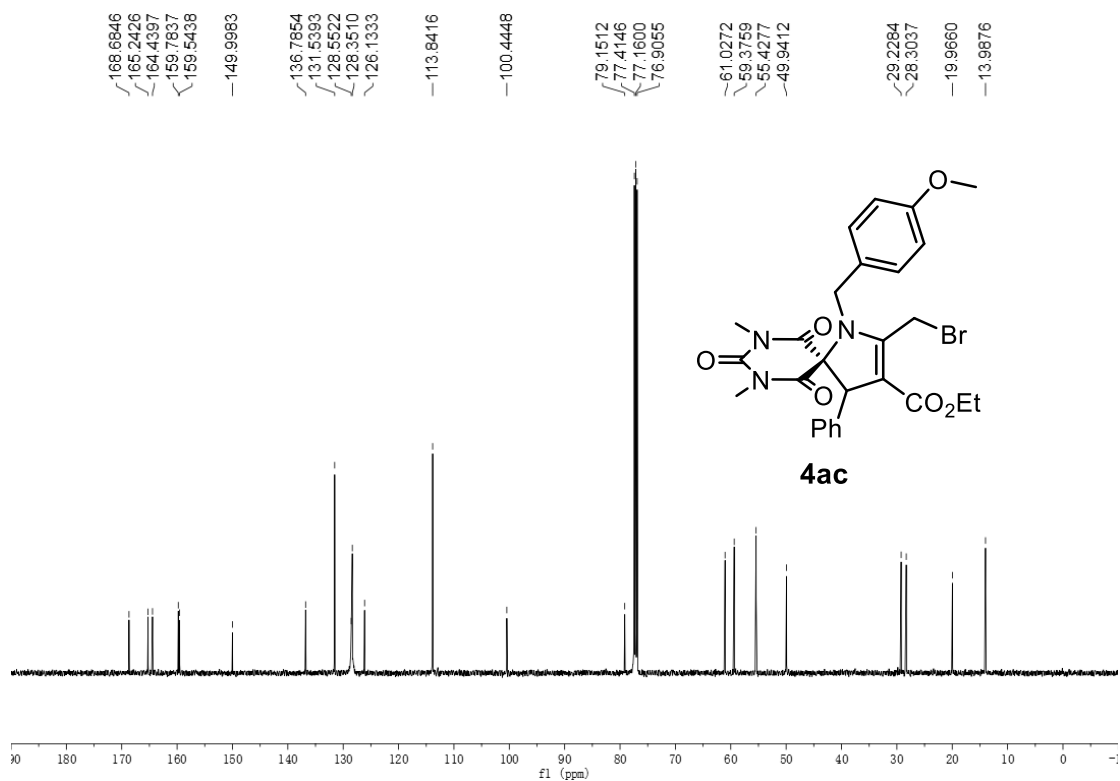

Figure S92. <sup>13</sup>C NMR (125 MHz, CDCl<sub>3</sub>) of compound 4ac

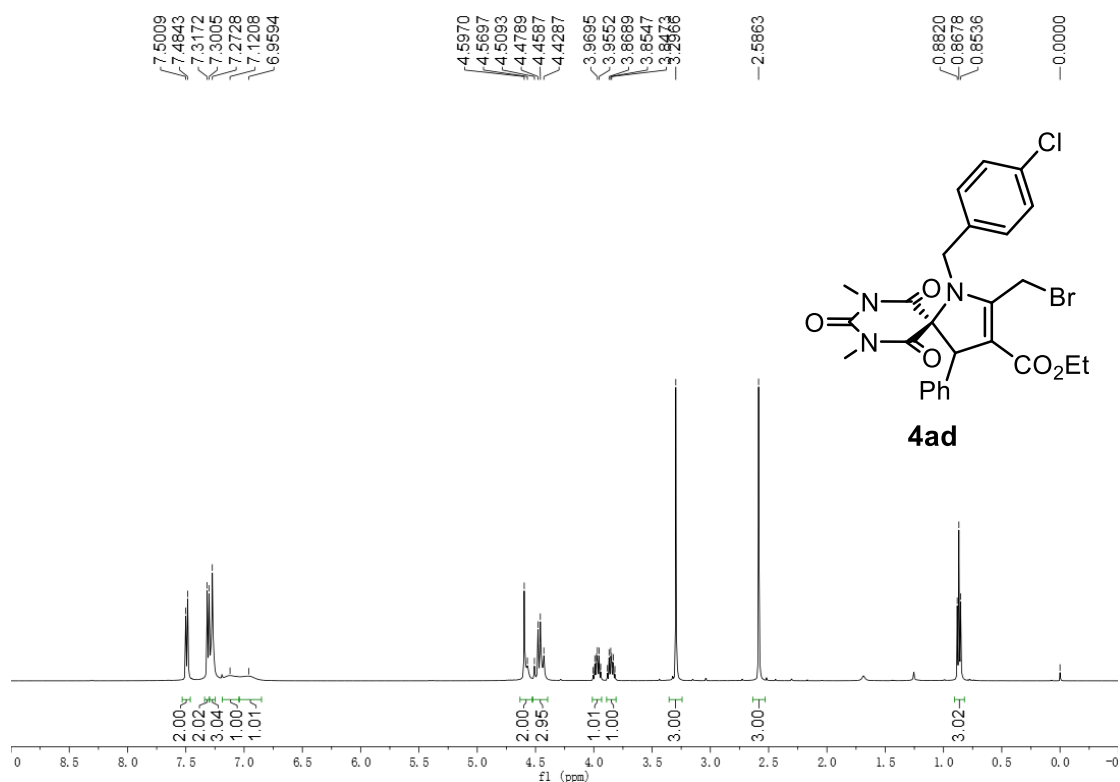

Figure S93. <sup>1</sup>H NMR (500 MHz, CDCl<sub>3</sub>) of compound 4ad

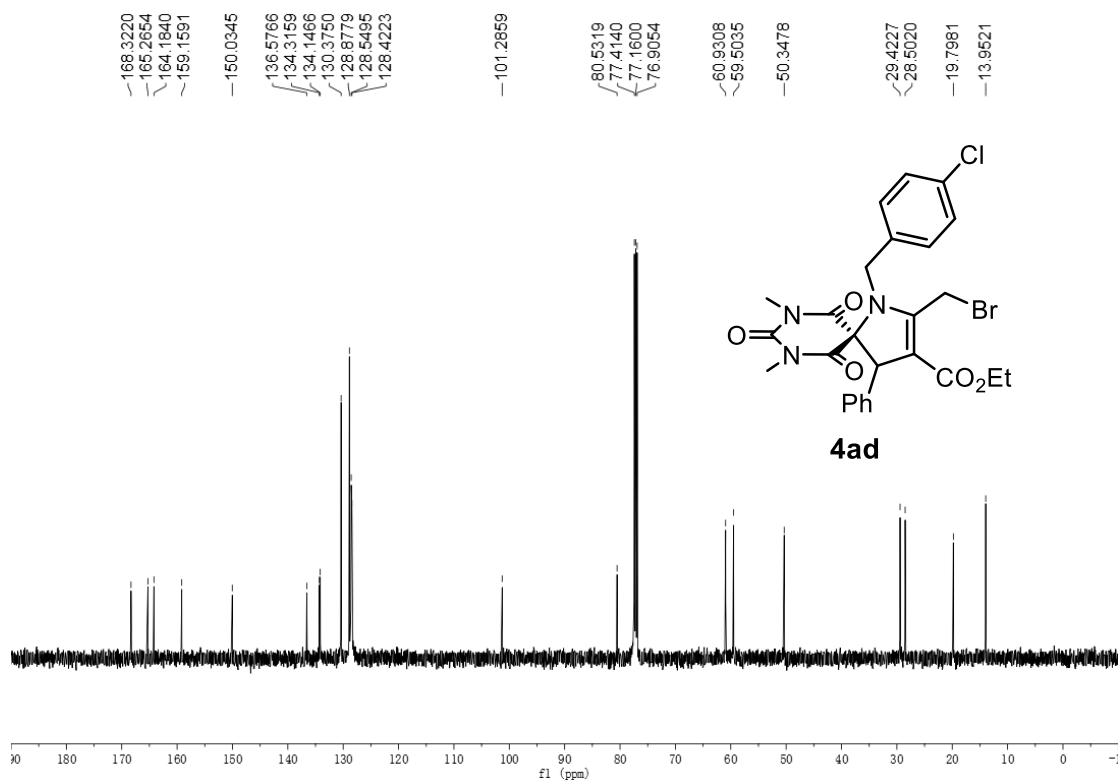

Figure S94. <sup>13</sup>C NMR (125 MHz, CDCl<sub>3</sub>) of compound 4ad

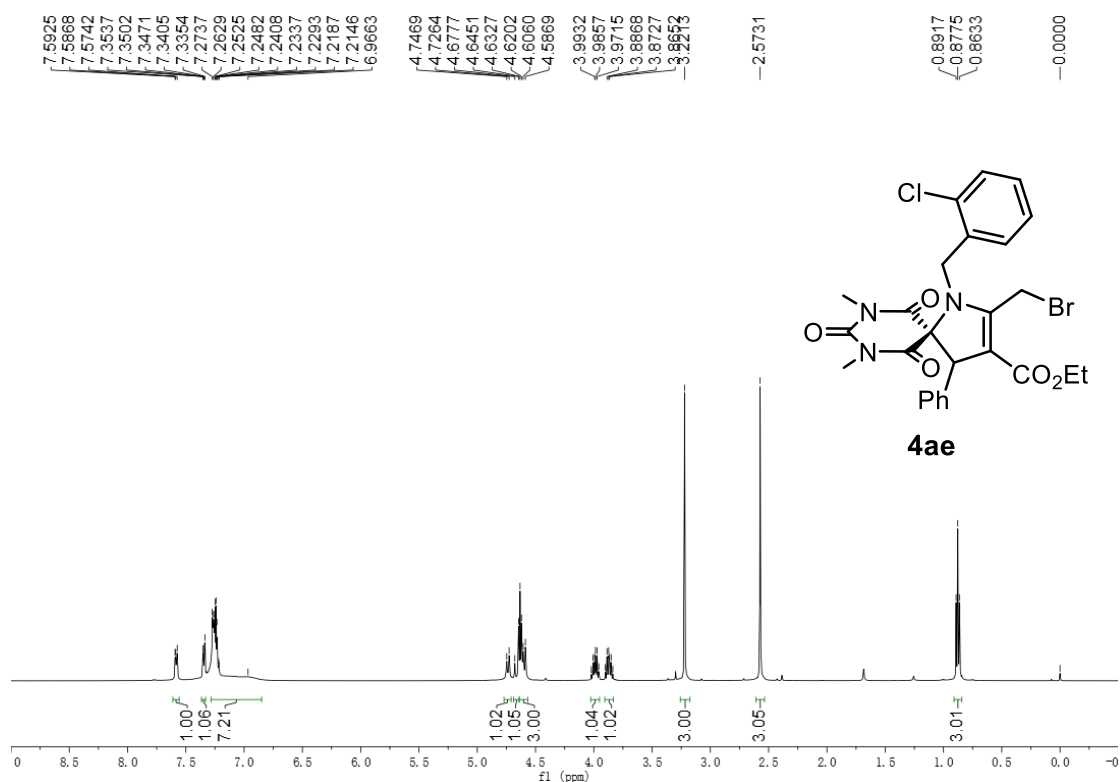

Figure S95. <sup>1</sup>H NMR (500 MHz, CDCl<sub>3</sub>) of compound 4ae

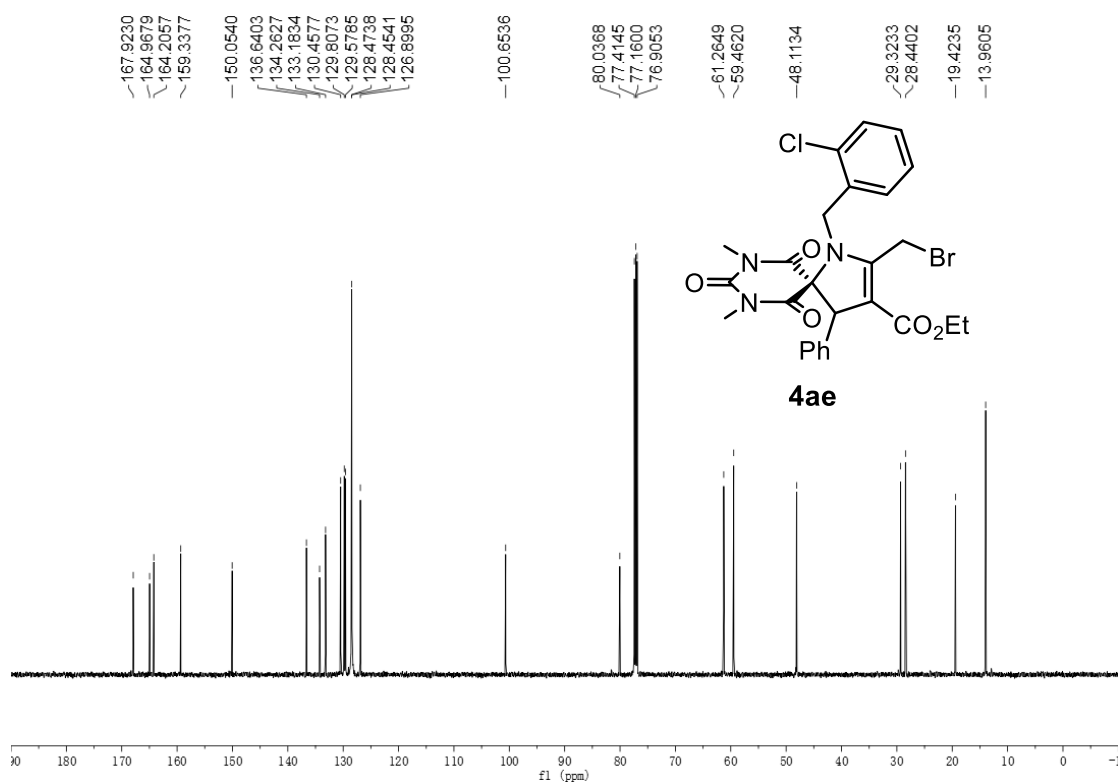

Figure S96. <sup>13</sup>C NMR (125 MHz, CDCl<sub>3</sub>) of compound 4ae

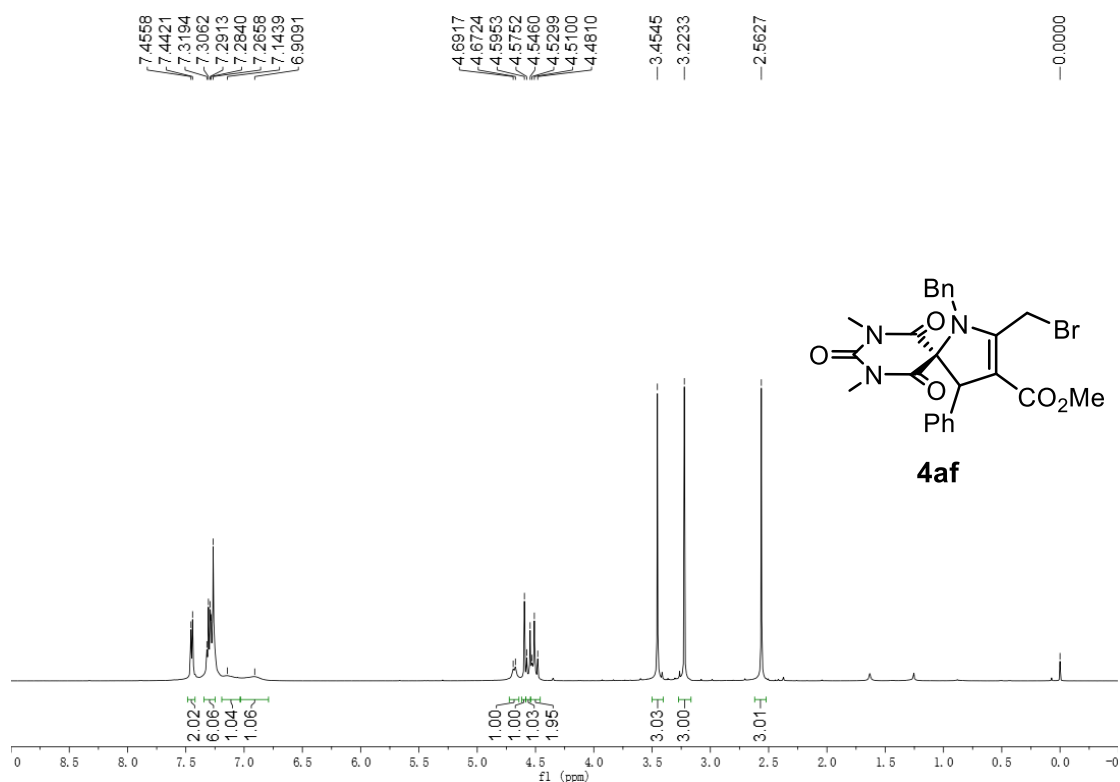

Figure S97. <sup>1</sup>H NMR (500 MHz, CDCl<sub>3</sub>) of compound **4af**

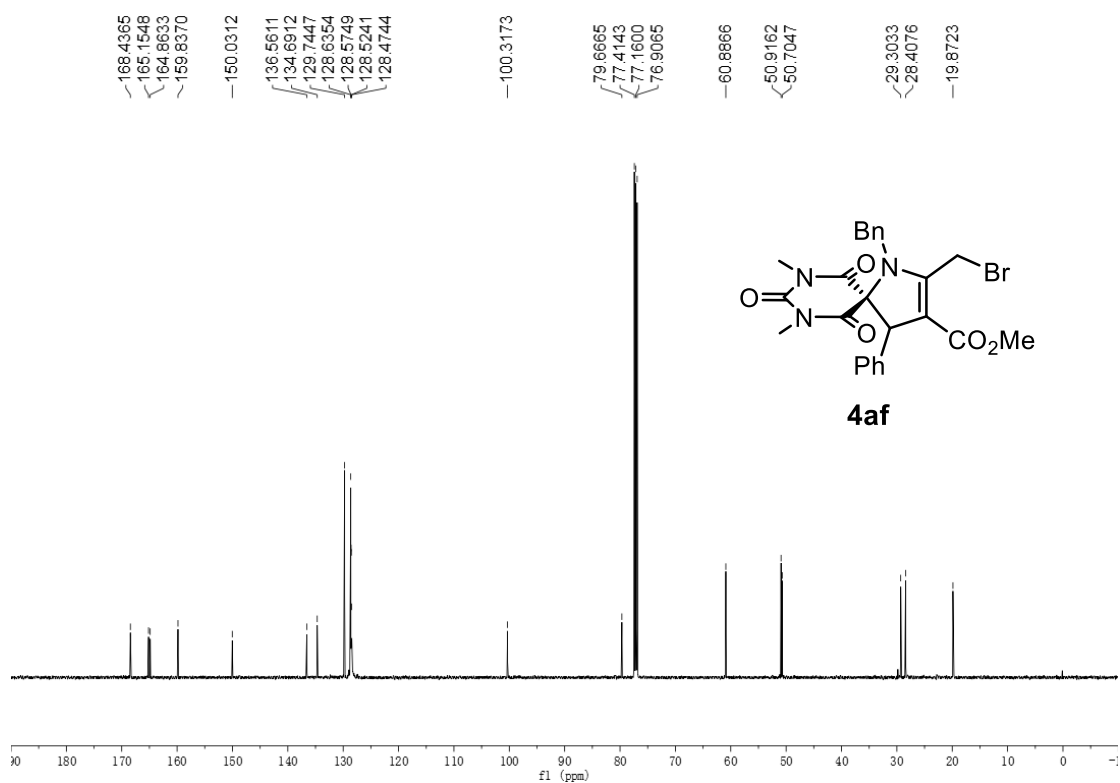

Figure S98. <sup>13</sup>C NMR (125 MHz, CDCl<sub>3</sub>) of compound **4af**

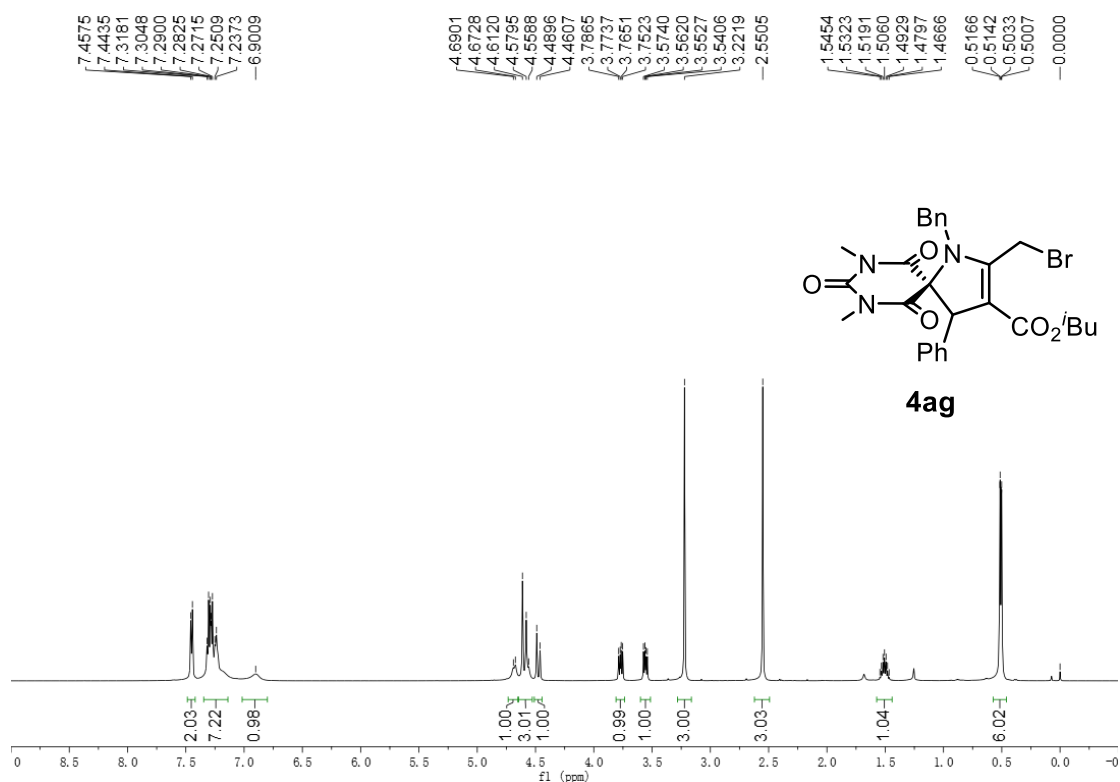

Figure S99. <sup>1</sup>H NMR (500 MHz, CDCl<sub>3</sub>) of compound 4ag

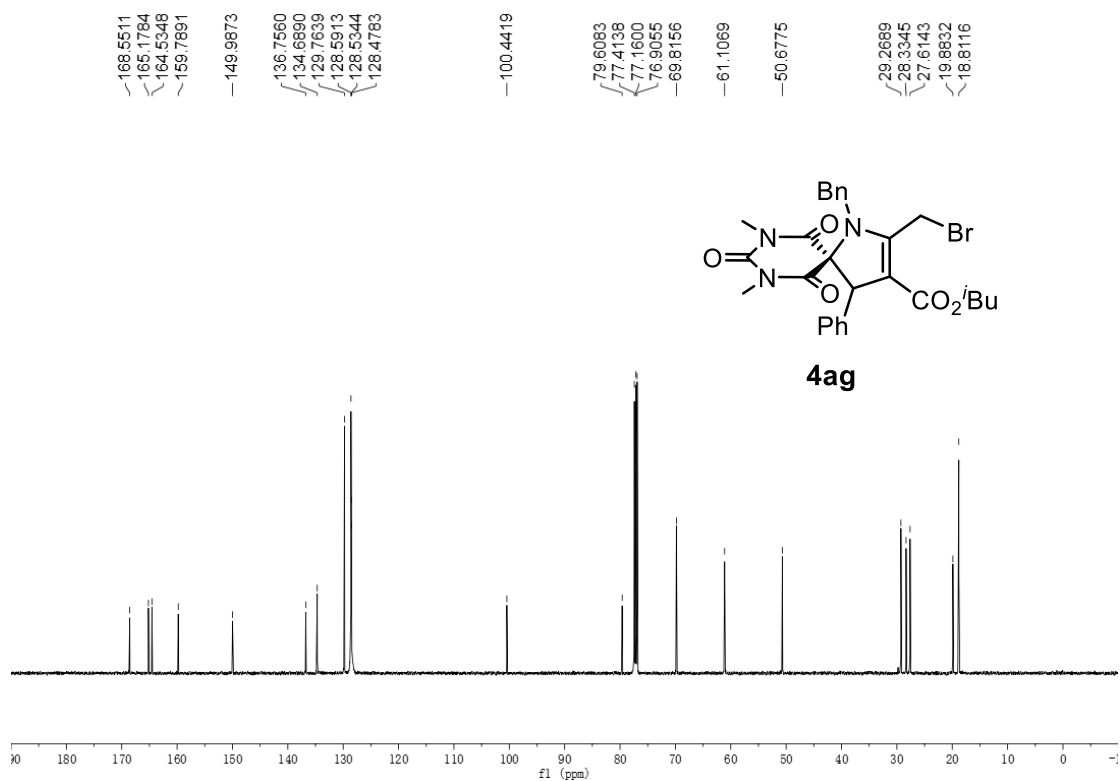

Figure S100. <sup>13</sup>C NMR (125 MHz, CDCl<sub>3</sub>) of compound 4ag

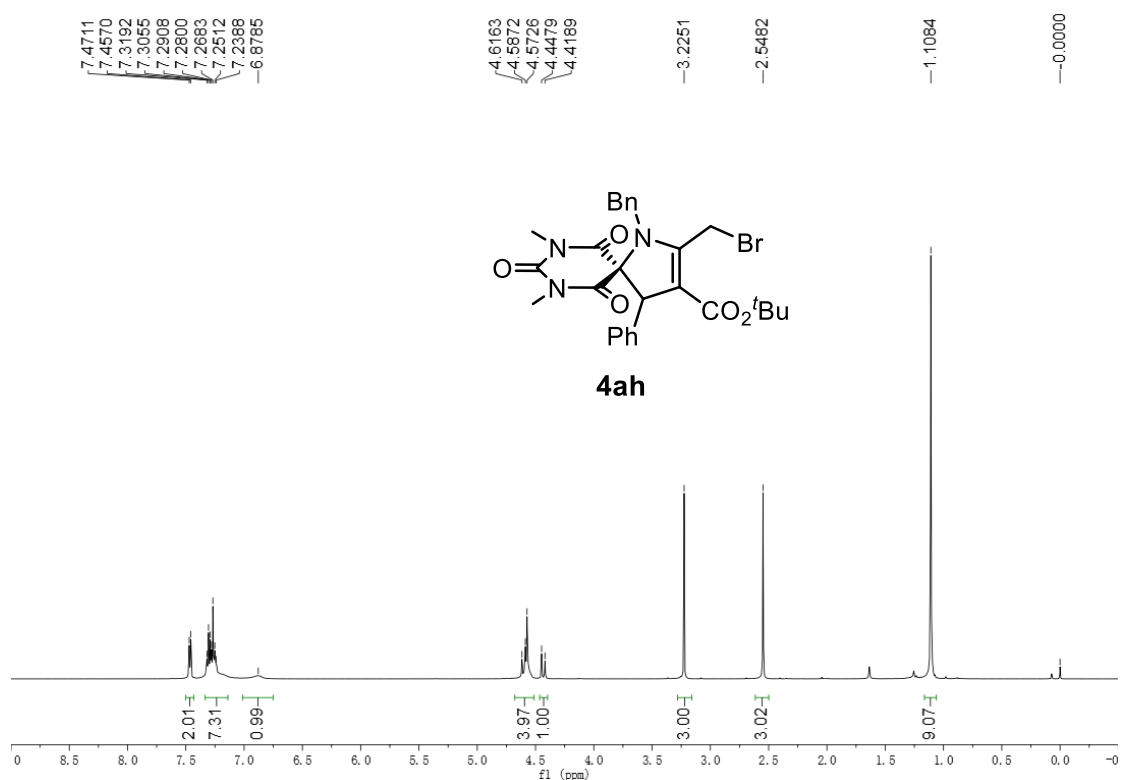

Figure S101. <sup>1</sup>H NMR (500 MHz, CDCl<sub>3</sub>) of compound **4ah**

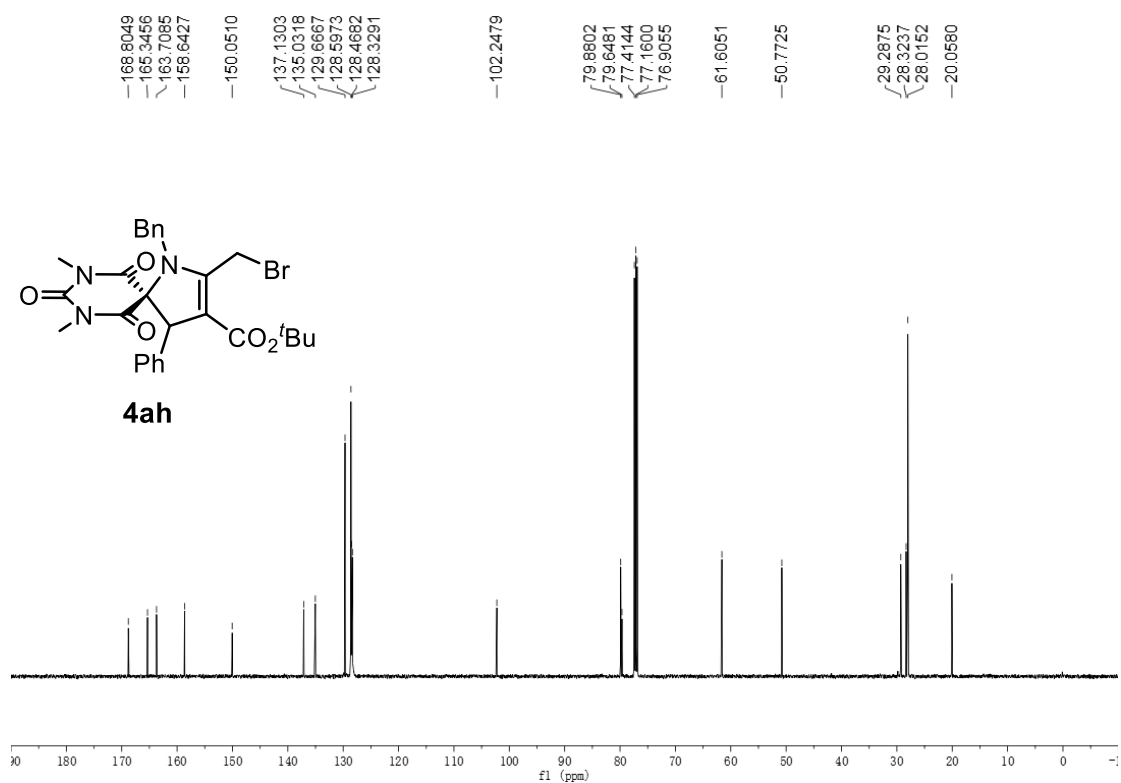

Figure S102. <sup>13</sup>C NMR (125 MHz, CDCl<sub>3</sub>) of compound **4ah**

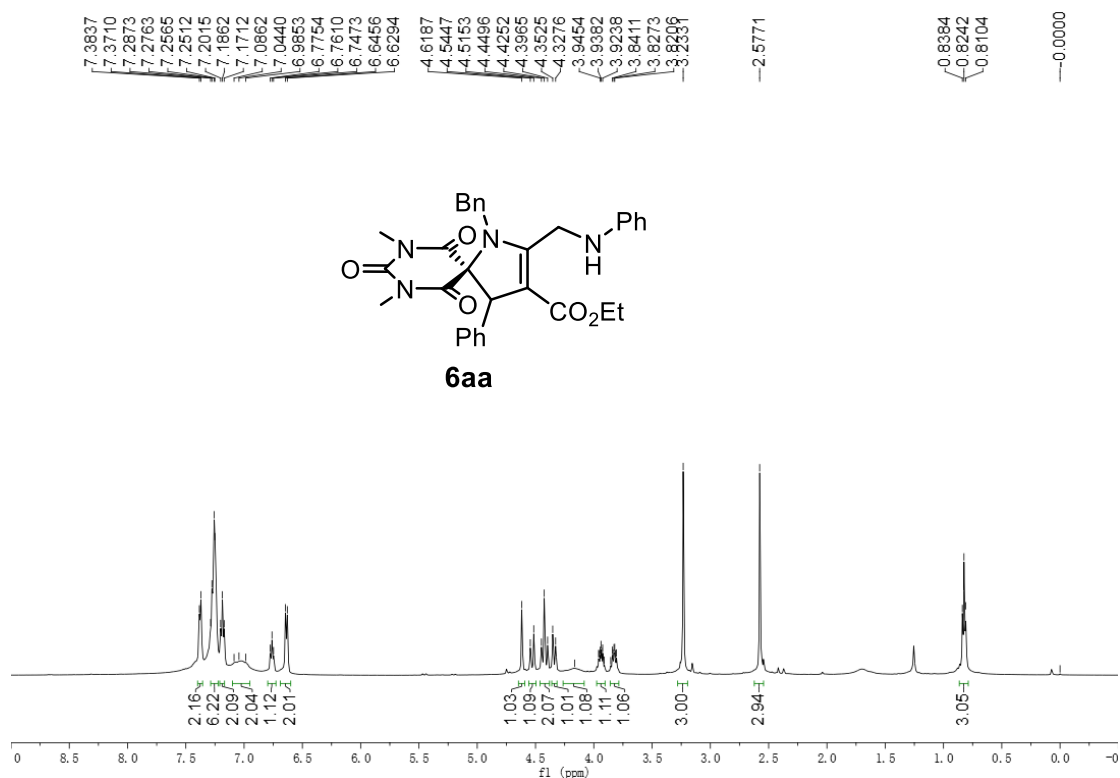

**Figure S103. <sup>1</sup>H NMR (500 MHz, CDCl<sub>3</sub>) of compound 6aa**

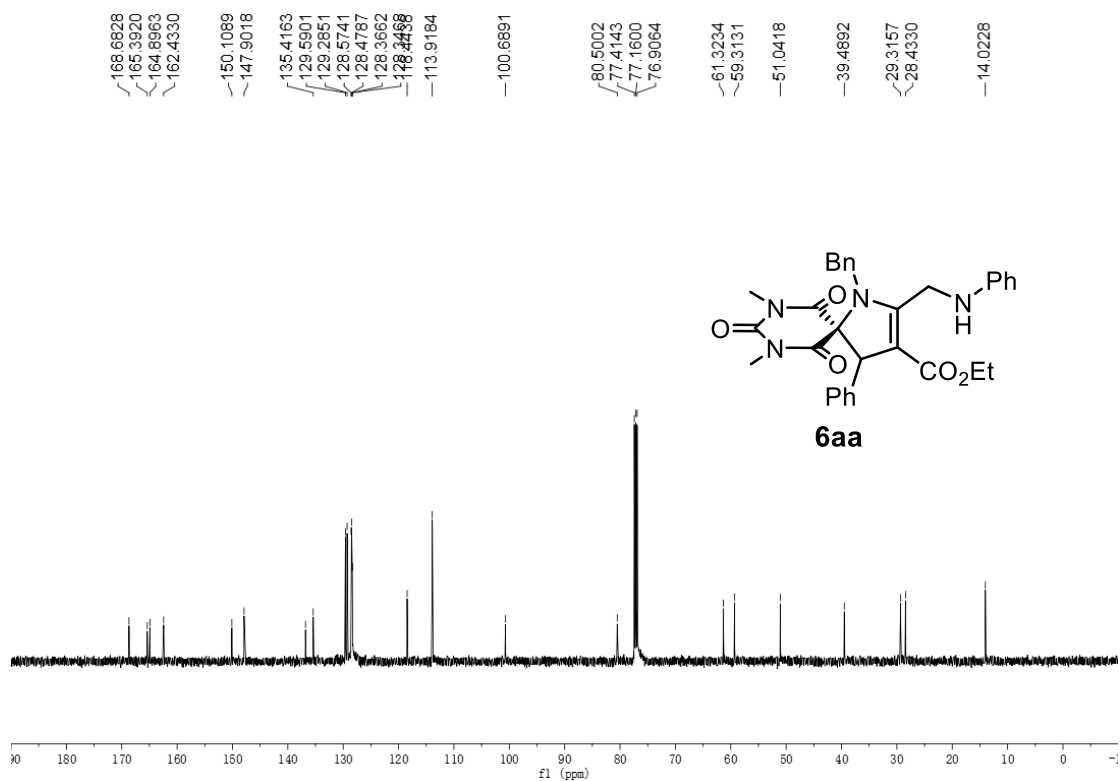

**Figure S104. <sup>13</sup>C NMR (125 MHz, CDCl<sub>3</sub>) of compound 6aa**
